# Supplementary material for: Comparison of carbon-sulfur and carbon-amine bond in therapeutic drug: 4β-S-aromatic heterocyclic podophyllum derivatives display antitumor activity
Source: PubMed Central journal article supplement (PMC4595834; doi:10.1038/srep14814), 2015-10-07
Supplement: srep14814-s1.pdf [file srep14814-s1.pdf]

**Comparison of carbon-sulfur and carbon-amine bond in therapeutic drug:  
4 $\beta$ -S-aromatic heterocyclic podophyllum derivatives display antitumor activity**

**Jian-Long Li <sup>1,a</sup>, Wei Zhao <sup>1,a</sup>, Chen Zhou <sup>1,a</sup>, Ya-Xuan Zhang <sup>a</sup>, Hong-Mei Li <sup>a</sup>, Ya-Ling  
Tang <sup>b</sup>, Xin-Hua Liang <sup>b</sup>, Tao Chen <sup>c</sup>, and Ya-Jie Tang <sup>a\*</sup>,**

*<sup>a</sup> Key Laboratory of Fermentation Engineering (Ministry of Education), Hubei Provincial  
Cooperative Innovation Center of Industrial Fermentation, Hubei University of Technology, Wuhan  
430068, China*

*<sup>b</sup> State Key Laboratory of Oral Diseases West China Hospital of Stomatology (Sichuan University),  
Chengdu Sichuan 610041, People's Republic of China*

*<sup>c</sup> Key Laboratory of Systems Bioengineering (Ministry of Education), School of Chemical  
Engineering and Technology, Tianjin University, Tianjin 300072, China*

\*Corresponding author. Tel. & Fax: +86-27-5975.0491 Email: yajietang@hotmail.com

<sup>1</sup> Equally contributed to this work

## Supporting Information

**Table S1.** Calculated docking of the complex of podophyllum derivatives with tubulin/Topo II.

| Compound | Energy<br>(-kcal/mol) | H-bond             | $\pi$ - $\pi$ packing | Compound | Energy<br>(-kcal/mol) | H-bond           | $\pi$ - $\pi$ packing           |
|----------|-----------------------|--------------------|-----------------------|----------|-----------------------|------------------|---------------------------------|
| 1S       | 2.11                  | -                  | Ser A178              | 1'S      | 6.51                  | Asp B479         | Arg B503, DG D13                |
| 1N       | 4.03                  | Asn B258           | Lys B352              | 1'N      | 3.04                  | Asp B479         | Arg B503, DT F9, DA D12, DG D13 |
| 2S       | 4.99                  | Lys B254           | Leu B248              | 2'S      | 10.26                 | Asp B479         | Arg B503, DT F9, DG D13         |
| 2N       | 5.72                  | Lys B352           | Leu B255, Lys B352    | 2'N      | 6.15                  | Asp B479         | Arg B503, DA D12, DG D13        |
| 3S       | 4.37                  | Ser A178           | Ala B316              | 3'S      | 3.86                  | Asp B479         | Arg B503, DT F9, DG D13         |
| 3N       | 3.87                  | Asn B258, Thr B353 | Leu B248              | 3'N      | 5.58                  | Asp B479         | Arg B503, DT F9, DG D13         |
| 4S       | 2.90                  | Thr A179           | Lys B254              | 4'S      | 4.52                  | Asp B479         | Arg B503, DT F9, DG D13         |
| 4N       | 2.45                  | Asn B258           | Lys B352              | 4'N      | 2.69                  | Asp B479         | Arg B503, DT F9, DG D13         |
| 5S       | 6.45                  | Lys B254           | Lys B254              | 5'S      | 5.10                  | Asp B479         | Arg B503, DT F9, DG D13         |
| 5N       | 6.13                  | -                  | Leu B248              | 5'N      | 4.12                  | Asp B479         | Arg B503, DA D12, DG D13        |
| 6S       | 6.28                  | Lys B352           | -                     | 6'S      | 8.42                  | Asp B479         | Arg B503, DT F9, DG D13         |
| 6N       | 3.14                  | Leu B255           | -                     | 6'N      | 8.10                  | Asp B479, DG D13 | Arg B503, DA D12, DG D13        |
| 7S       | -2.03                 | -                  | -                     | 7'S      | -7.23                 | -                | -                               |
| 7N       | -2.37                 | Thr B353           | -                     | 7'N      | -6.25                 | DC E8            | DT F9, DA D12                   |
| 8S       | -1.49                 | -                  | -                     | 8'S      | -4.23                 | Lys B456         | Arg B503                        |
| 8N       | -5.37                 | -                  | Leu B248              | 8'N      | -6.43                 | -                | Arg B503, DT F9                 |
| 9S       | -10.00                | -                  | -                     | 9'S      | -7.26                 | Lys B456         | Arg B503                        |
| 9N       | -11.04                | Leu B255           | -                     | 9'N      | -5.32                 | -                | Arg B503                        |
| PTOX     | 4.11                  | Leu B248           | Ala B316              | VP-16    | 6.38                  | Asp B479         | Arg B503, DC E8, DG D13         |

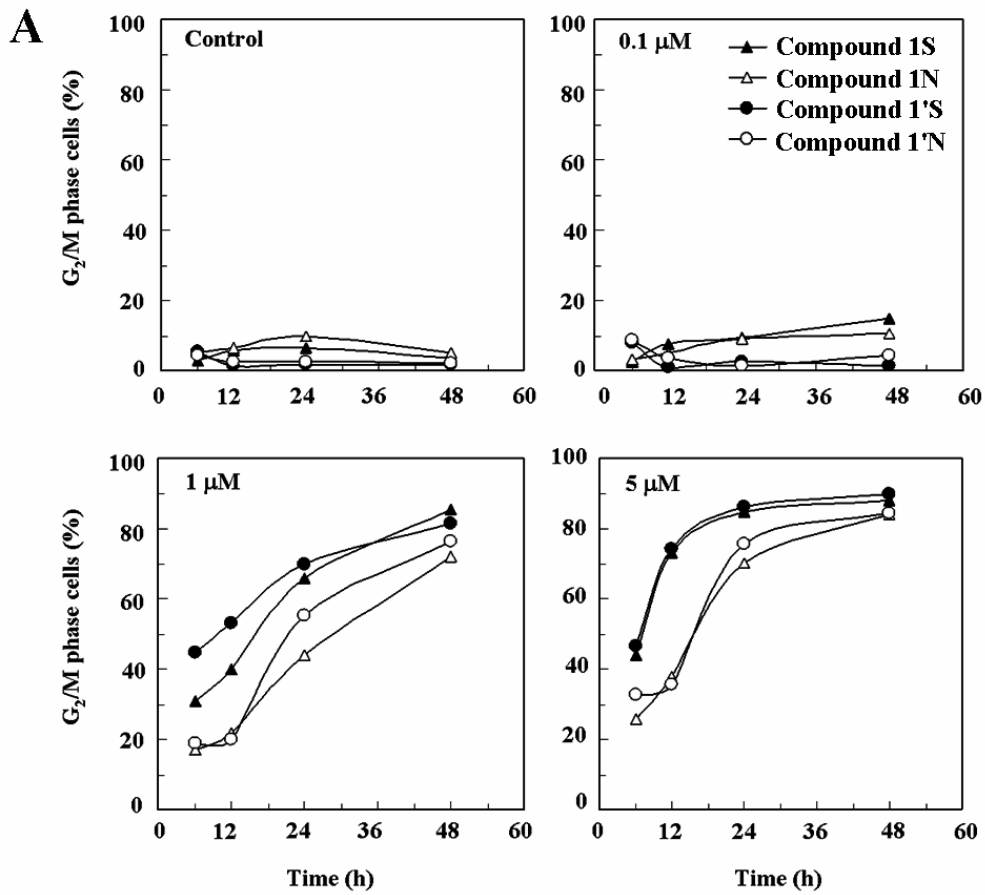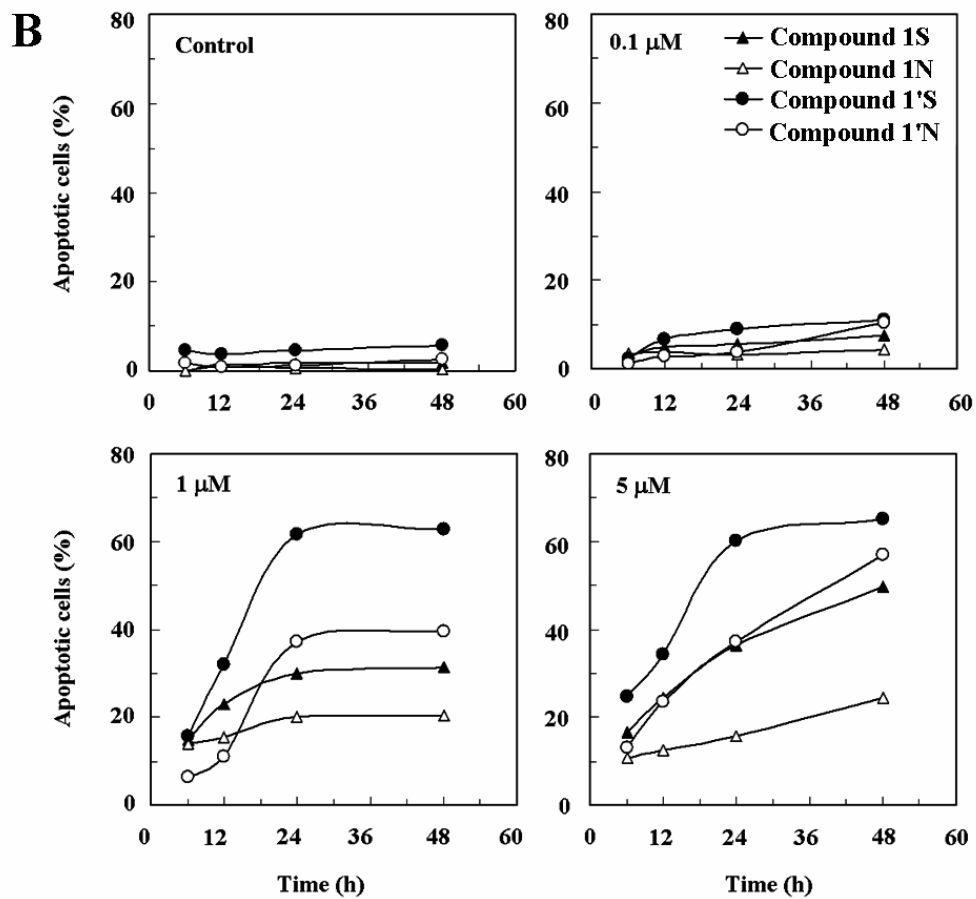

**Figure S1.** Effects of podophyllum derivatives on the HeLa cell cycle arrest and apoptosis induce. (A) Compound 4 $\beta$ -S-(1, 3, 4-trizole-2)-4-deoxy-podophyllotoxin (Compound 1S), Compound 4 $\beta$ -NH-(1, 3, 4-trizole-2)-4-deoxy-podophyllotoxin (Compound 1N), 4 $\beta$ -S-(1, 3, 4-trizole-2)-4-deoxy-4'-demethylepipodophyllotoxin (Compound 1'S) and Compound 4 $\beta$ -NH-(1, 3, 4-trizole-2)-4-deoxy-4'-demethylepipodophyllotoxin (Compound 1'N) arrested cell cycle in HeLa cells in a dose- and time-dependent manner at the concentration of 0, 0.1, 1, and 5  $\mu$ M for 6, 12, 24, and 48 h, respectively. Compared with the cells incubated with no drug, the treatment of Compounds 1S and 1N did not induce the G<sub>2</sub>/M phase arrest at a lower concentration of 0.1  $\mu$ M. However, the percentage of G<sub>2</sub>/M phase cells was accumulated significantly to about 80% at 48 h when the concentration was increased to 1  $\mu$ M. And then the percentage of G<sub>2</sub>/M phase cells continuously increased to the maximum about 80-90% at the higher concentration of 5  $\mu$ M after the incubation of 48 h. Corresponding to Compounds 1S and 1N, the comparison between Compound 1'S and 1'N showed the similar trend that Compound 1'S was superior than Compound 1'N to arrest the cell cycle. (B) Compound 1S, 1N, 1'S, and 1'N induced cell apoptosis in HeLa cells in a dose- and time-dependent manner at the concentration of 0, 0.1, 1, and 5  $\mu$ M for 6, 12, 24, and 48 h, respectively. Symbols: the negative control without adding Compounds 1S, 1N, 1'S and 1'N (0  $\mu$ M), Compound 1S (black triangle, ▲), Compound 1N (open triangle, △), Compound 1'S (black circle, ●), and Compound 1'N (open circle, ○).

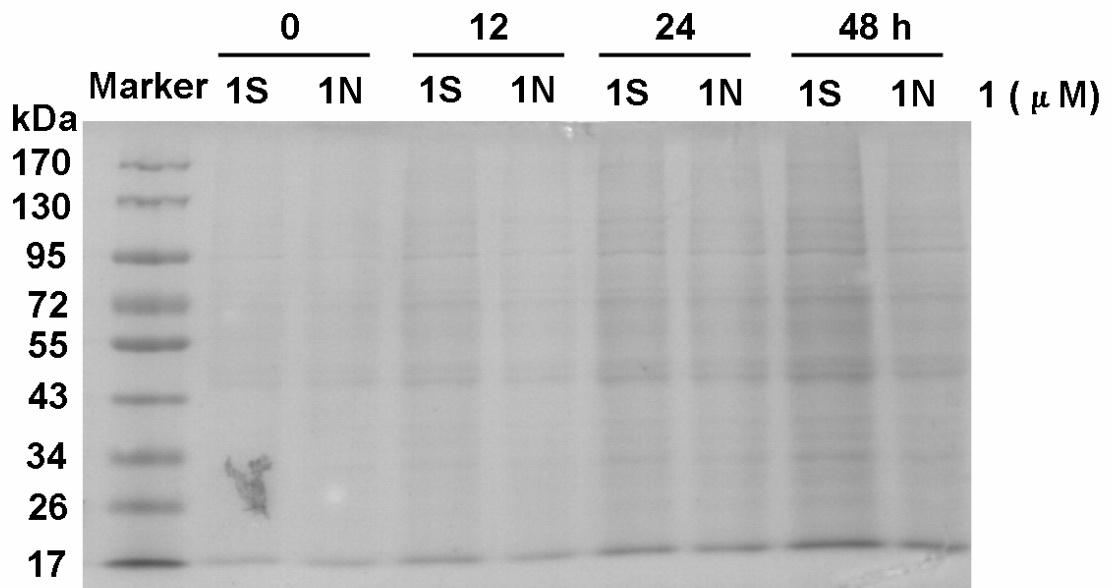

Figure S2

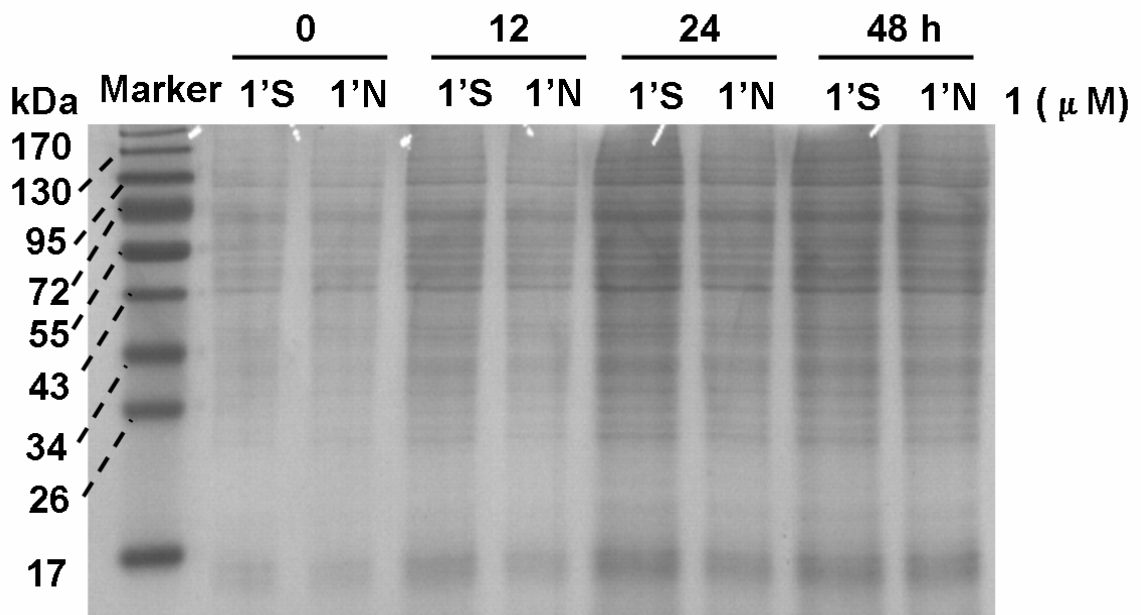

Figure S3



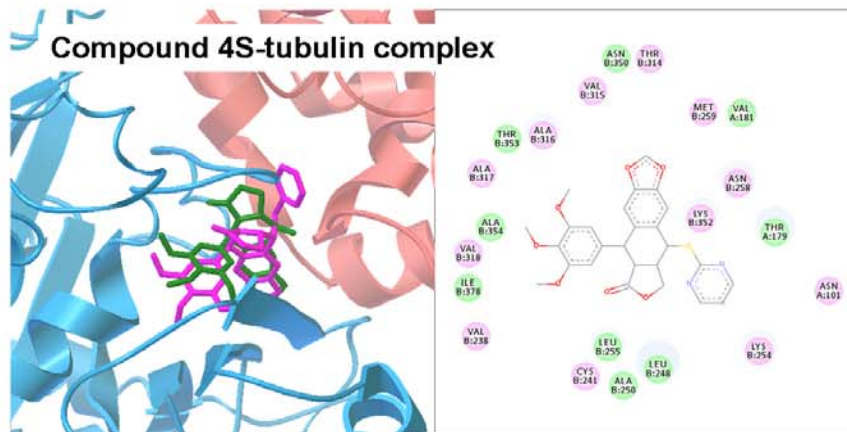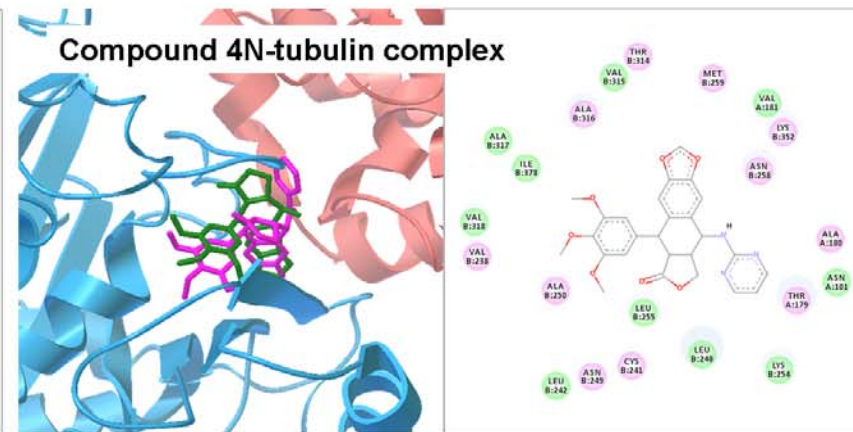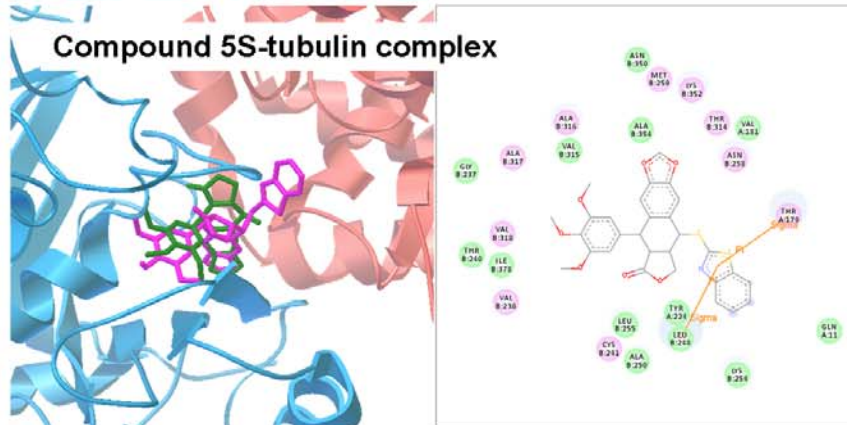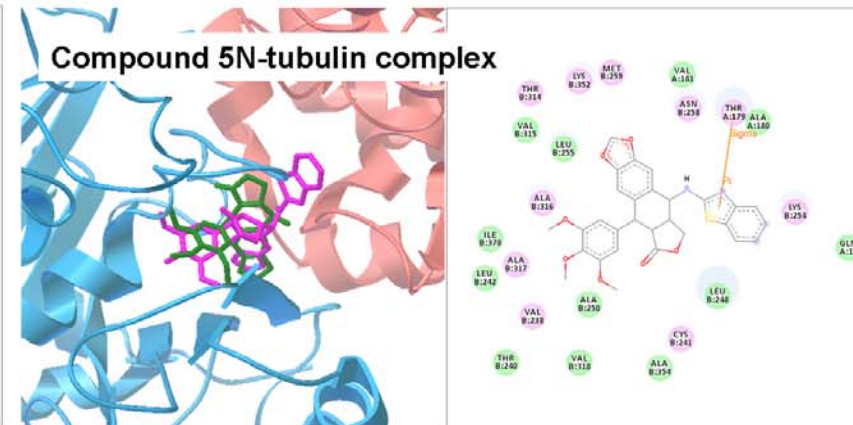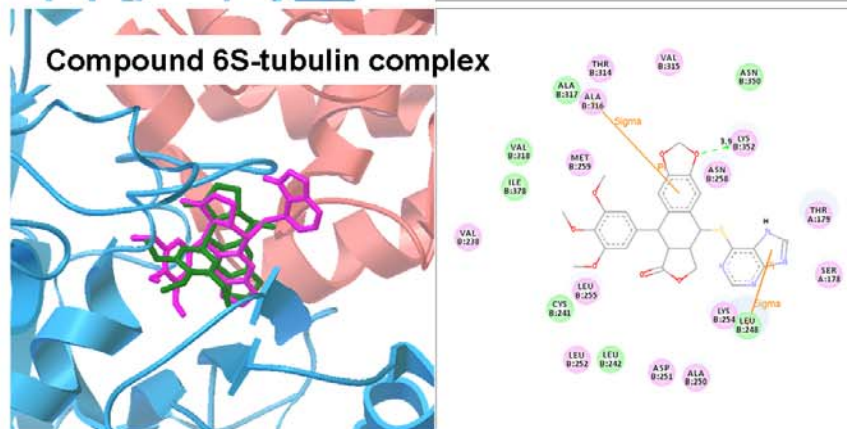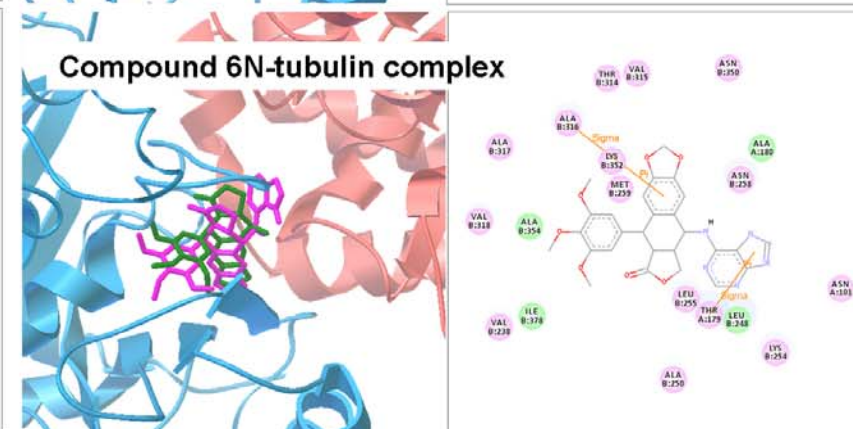

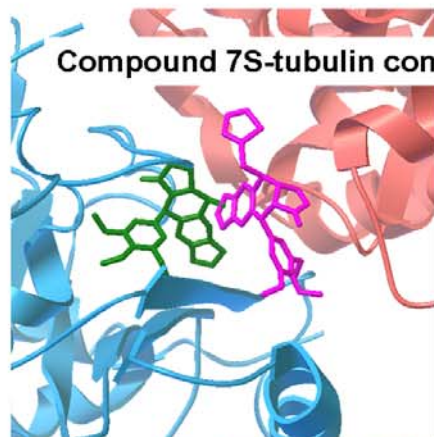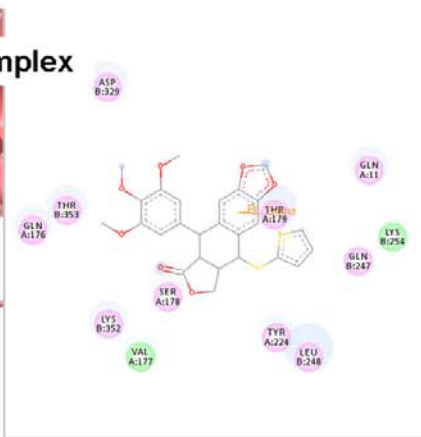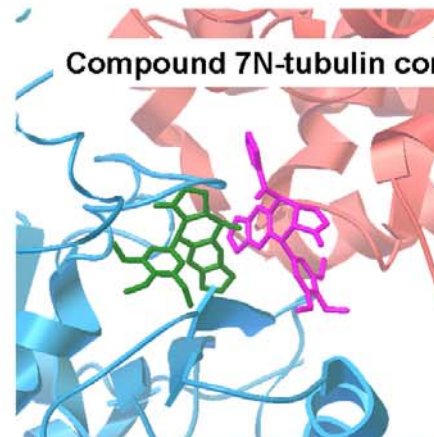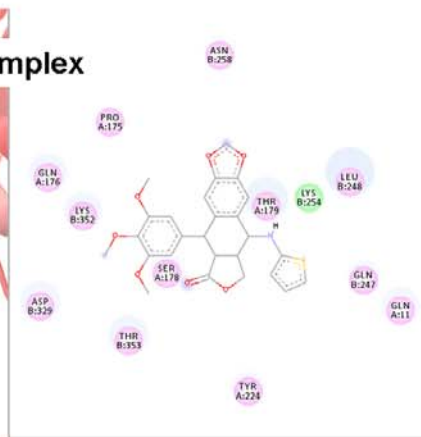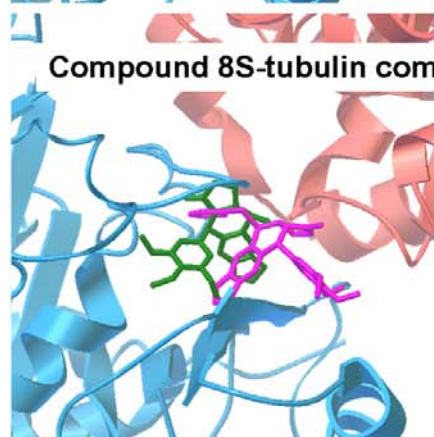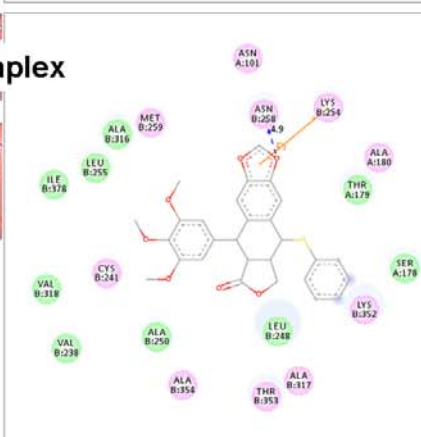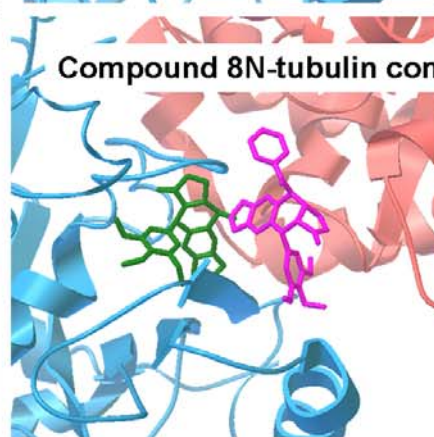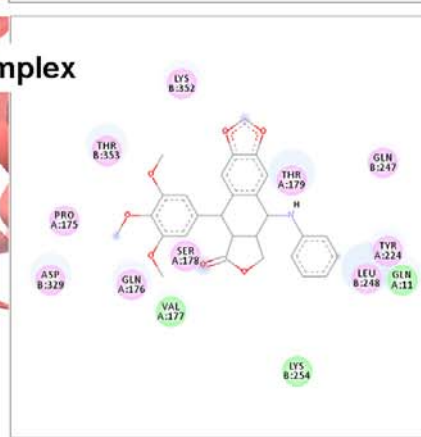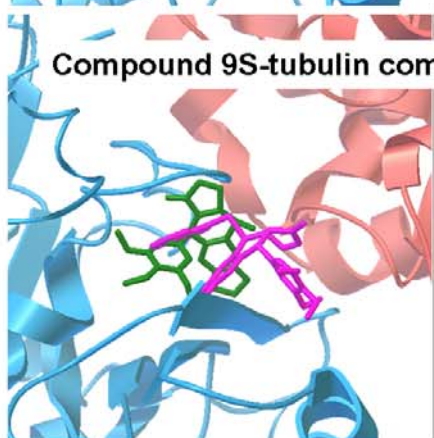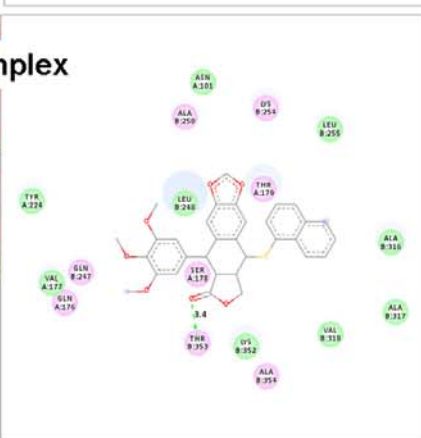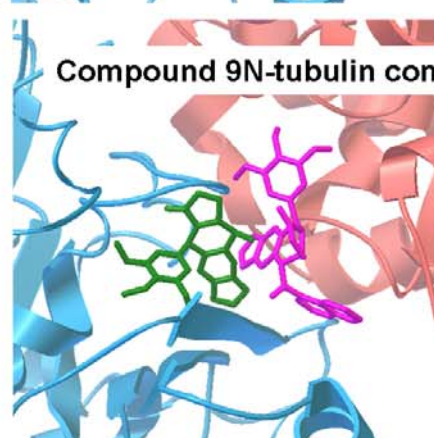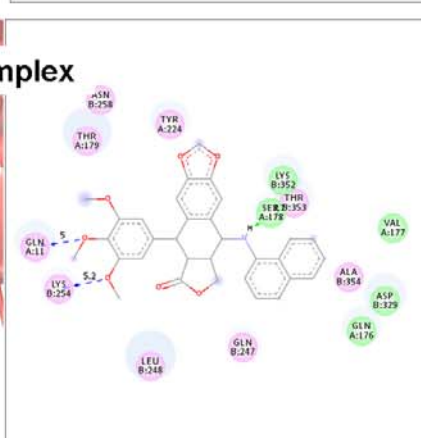



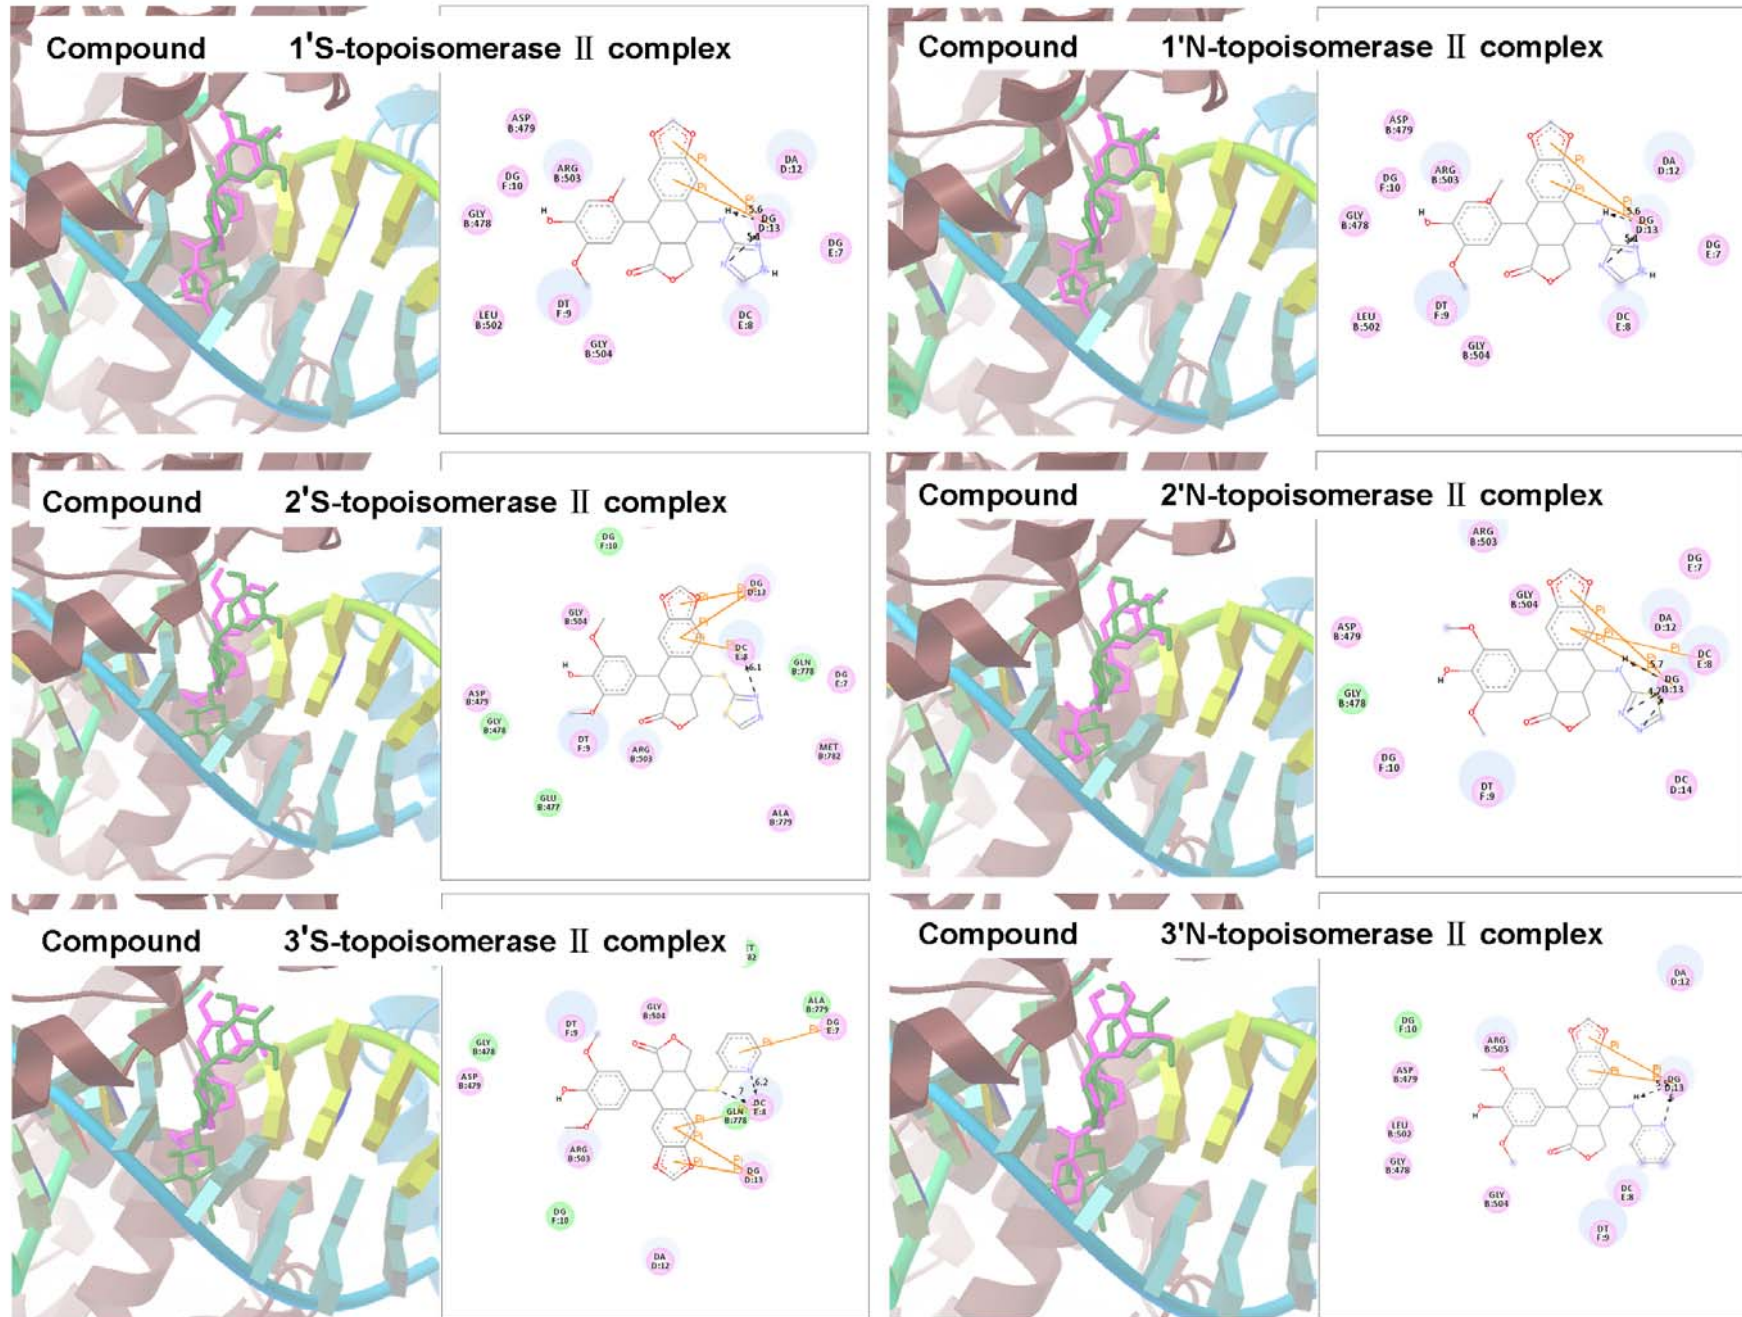

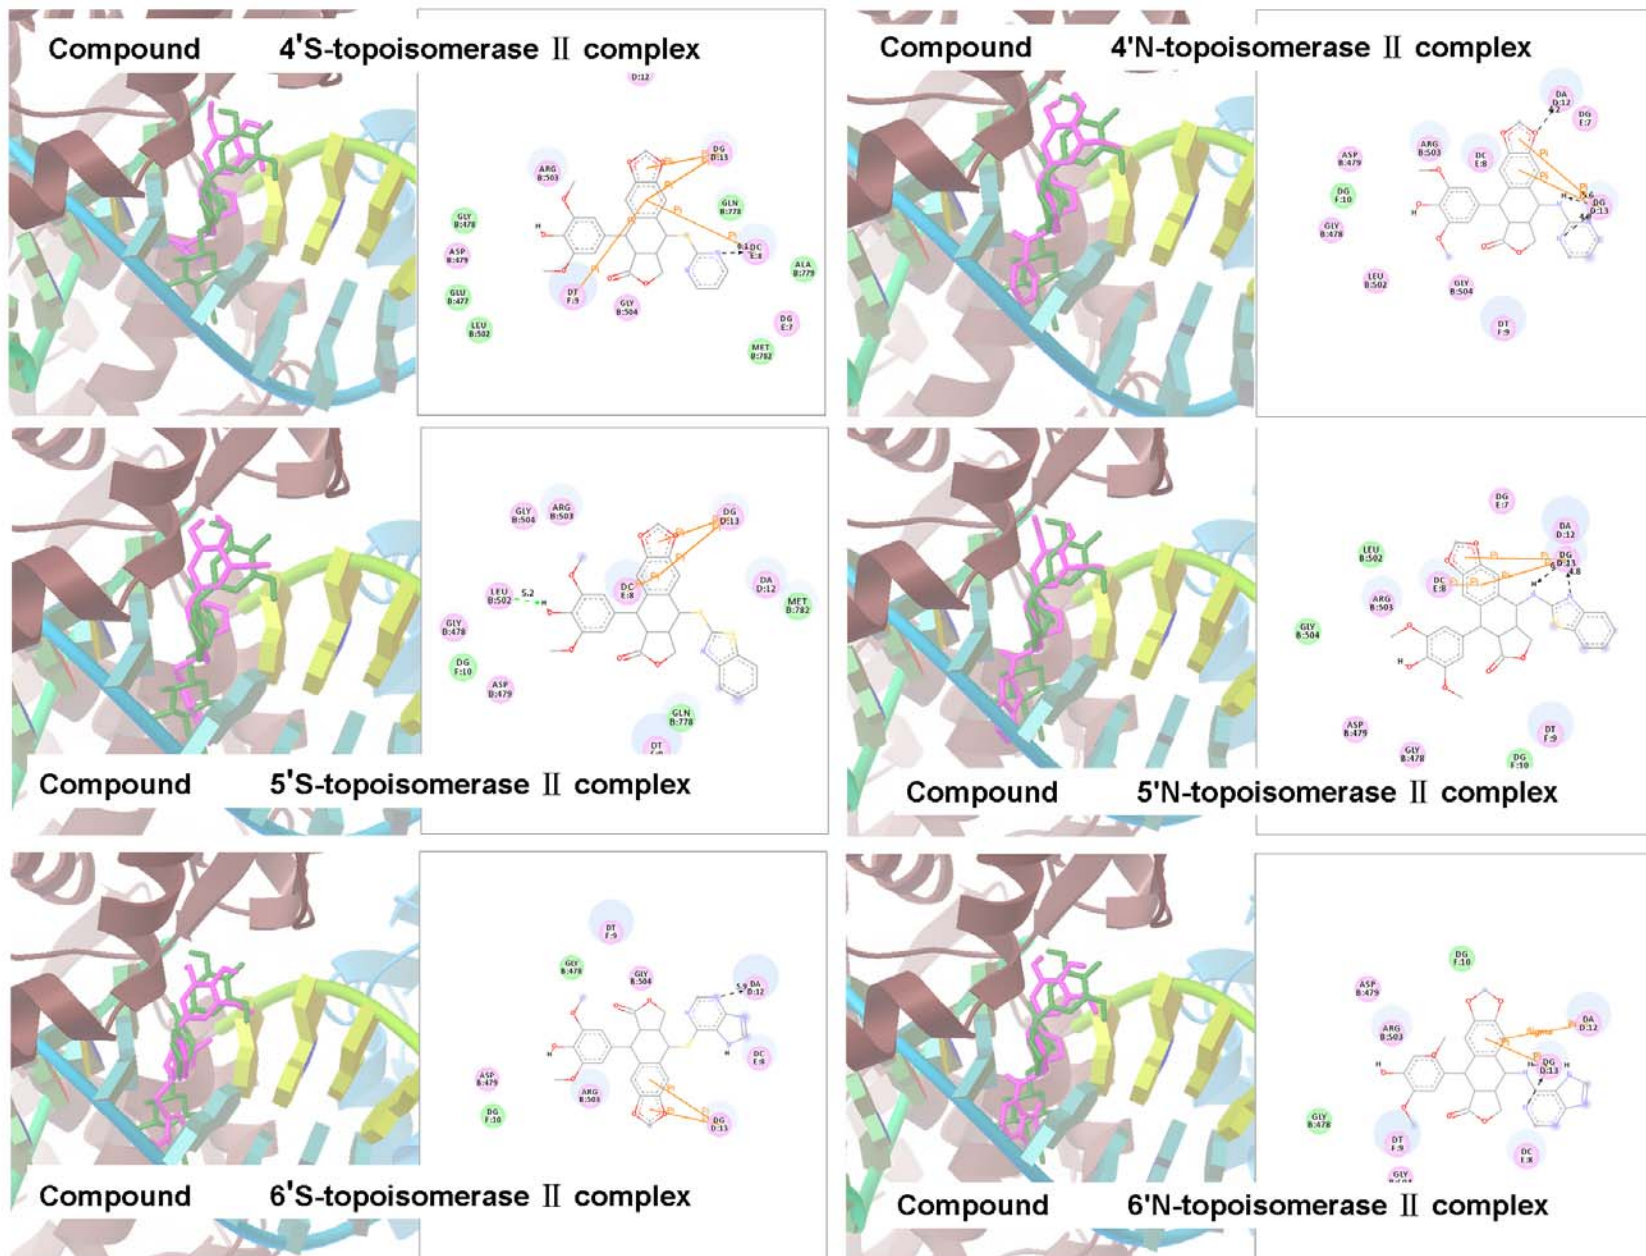

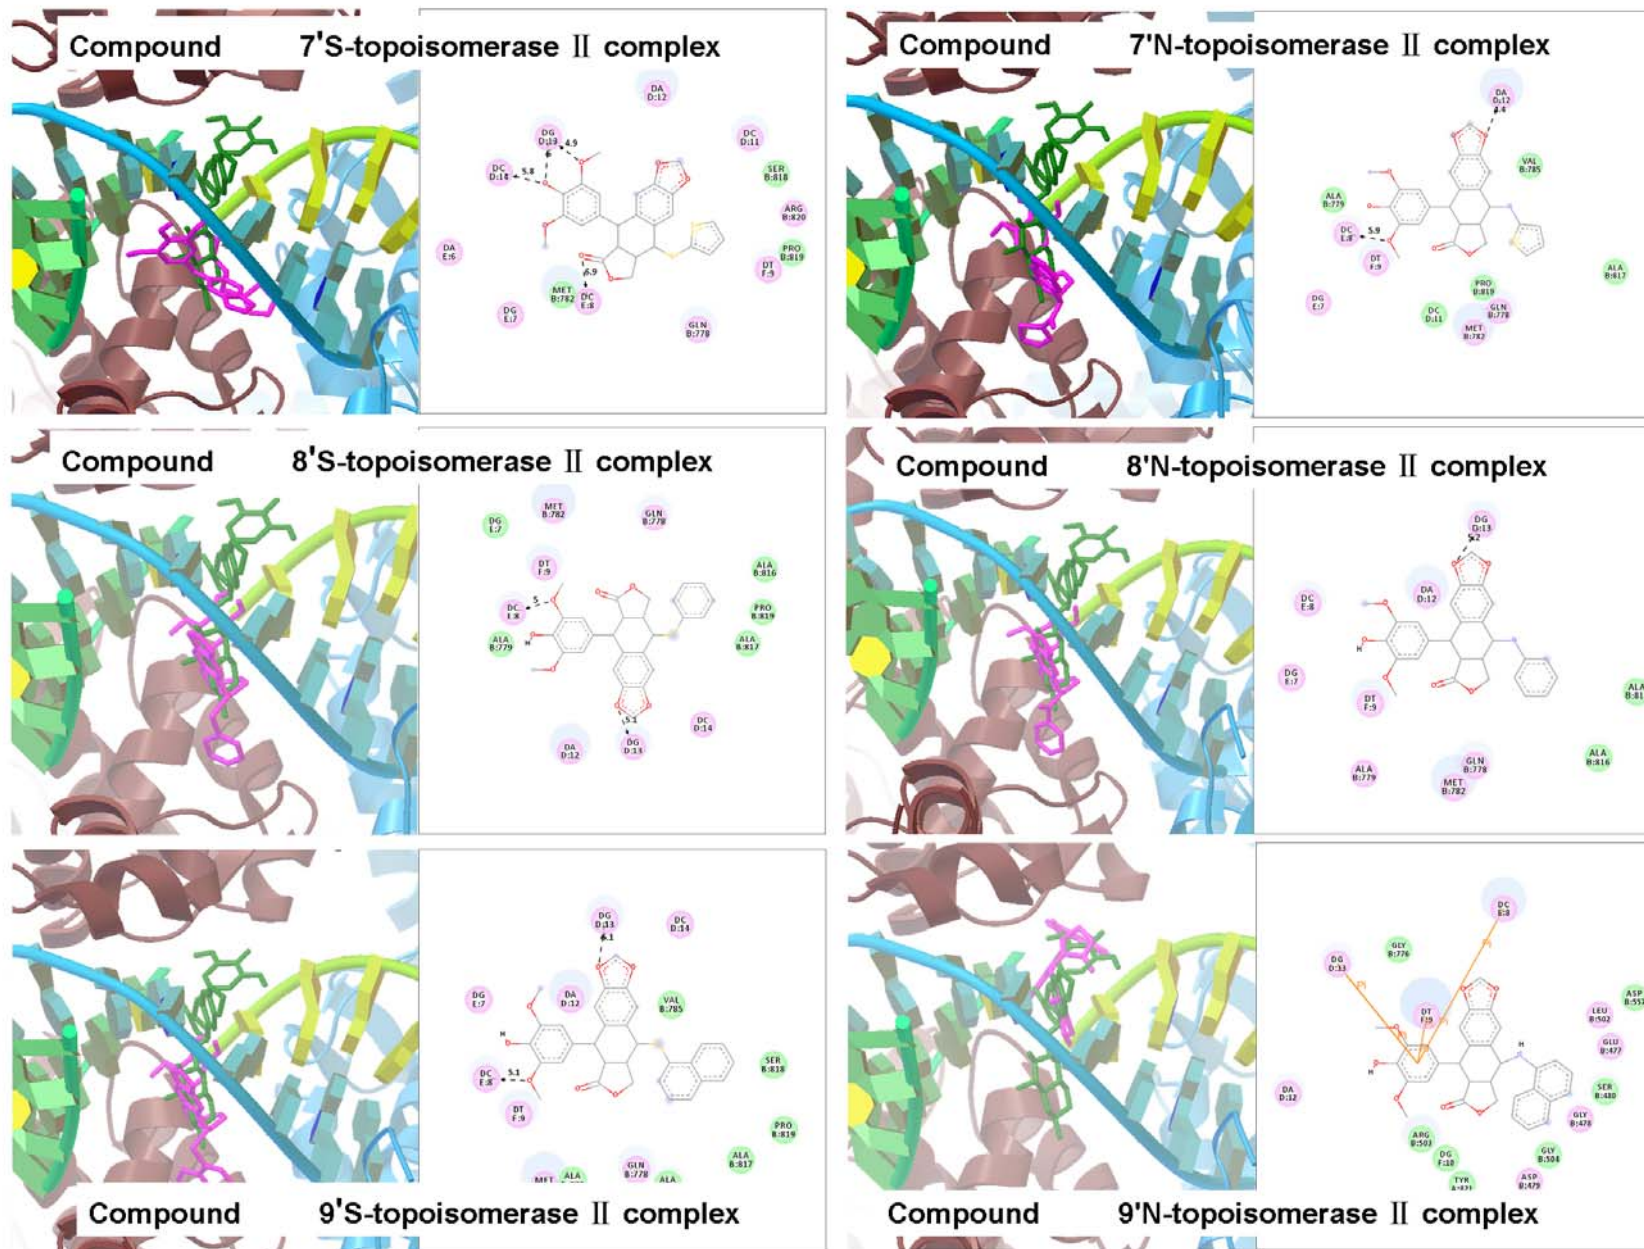

|    |                                                                                             |
|----|---------------------------------------------------------------------------------------------|
| 8  | Copies of $^1\text{H}$ , $^{13}\text{C}$ NMR and 2D NMR (1H-1H COSY, HMBC, HSQC) Spectra    |
| 9  | 1. NMR and MS spectrum of compound 3S.                                                      |
| 10 | <b>1.1. <math>^1\text{H}</math> NMR spectrum of compound 3S.</b>                            |
| 11 | <b>1.2. <math>^{13}\text{C}</math> NMR spectrum of compound 3S.</b>                         |
| 12 | <b>1.3. <math>^1\text{H}</math>-<math>^1\text{H}</math> COSY spectrums for compound 3S.</b> |
| 13 | <b>1.4. HMBC spectrums for compound 3S.</b>                                                 |
| 14 | <b>1.5. HSQC spectrums for compound 3S.</b>                                                 |
| 15 | <b>1.6. MS diagram for compound 3S.</b>                                                     |
| 16 | 2. NMR spectrum of compound 4S.                                                             |
| 17 | <b>2.1. <math>^1\text{H}</math> NMR spectrum of compound 4S.</b>                            |
| 18 | <b>2.2. <math>^{13}\text{C}</math> NMR spectrum of compound 4S.</b>                         |
| 19 | <b>2.3. <math>^1\text{H}</math>-<math>^1\text{H}</math> COSY spectrums for compound 4S.</b> |
| 20 | <b>2.4. HMBC spectrums for compound 4S.</b>                                                 |
| 21 | <b>2.5. HSQC spectrums for compound 4S.</b>                                                 |
| 22 | <b>2.6. MS diagram for compound 4S.</b>                                                     |
| 23 | 3. NMR and MS spectrum of compound 5S.                                                      |
| 24 | <b>3.1. <math>^1\text{H}</math> NMR spectrum of compound 5S.</b>                            |
| 25 | <b>3.2. <math>^{13}\text{C}</math> NMR spectrum of compound 5S.</b>                         |
| 26 | <b>3.3. <math>^1\text{H}</math>-<math>^1\text{H}</math> COSY spectrums for compound 5S.</b> |
| 27 | <b>3.4. HMBC spectrums for compound 5S.</b>                                                 |
| 28 | <b>3.5. HSQC spectrums for compound 5S.</b>                                                 |
| 29 | <b>3.6. MS diagram for compound 5S.</b>                                                     |
| 30 | 4. NMR and MS spectrum of compound 6S.                                                      |

- 31 **4.1.  $^1\text{H}$  NMR spectrum of compound 6S.**
- 32 **4.2.  $^{13}\text{C}$  NMR spectrum of compound 6S.**
- 33 **4.3.  $^1\text{H}$ - $^1\text{H}$  COSY spectrums for compound 6S.**
- 34 **4.4. HMBC spectrums for compound 6S.**
- 35 **4.5. HSQC spectrums for compound 6S.**
- 36 **4.6. MS diagram for compound 6S.**
- 37 5. NMR and MS spectrum of compound 3'S.
- 38 **5.1.  $^1\text{H}$  NMR spectrum of compound 3'S.**
- 39 **5.2.  $^{13}\text{C}$  NMR spectrum of compound 3'S.**
- 40 **5.3.  $^1\text{H}$ - $^1\text{H}$  COSY spectrums for compound 3'S.**
- 41 **5.4. HMBC spectrums for compound 3'S.**
- 42 **5.5. HSQC spectrums for compound 3'S.**
- 43 **5.6. MS diagram for compound 3'S.**
- 44 6. NMR and MS spectrum of compound 4'S.
- 45 **6.1.  $^1\text{H}$  NMR spectrum of compound 4'S.**
- 46 **6.2.  $^{13}\text{C}$  NMR spectrum of compound 4'S.**
- 47 **6.3.  $^1\text{H}$ - $^1\text{H}$  COSY spectrums for compound 4'S.**
- 48 **6.4. HMBC spectrums for compound 4'S.**
- 49 **6.5. HSQC spectrums for compound 4'S.**
- 50 **6.6. MS diagram for compound 4'S.**
- 51 7. NMR and MS spectrum of compound 5'S.
- 52 **7.1.  $^1\text{H}$  NMR spectrum of compound 5'S.**
- 53 **7.2.  $^{13}\text{C}$  NMR spectrum of compound 5'S.**

|    |                                                                                              |
|----|----------------------------------------------------------------------------------------------|
| 54 | <b>7.3. <math>^1\text{H}</math>-<math>^1\text{H}</math> COSY spectrums for compound 5'S.</b> |
| 55 | <b>7.4. HMBC spectrums for compound 5'S.</b>                                                 |
| 56 | <b>7.5. HSQC spectrums for compound 5'S.</b>                                                 |
| 57 | <b>7.6. MS diagram for compound 5'S.</b>                                                     |
| 58 | 8. NMR spectrum of compound 6'S.                                                             |
| 59 | <b>8.1. <math>^1\text{H}</math> NMR spectrum of compound 6'S.</b>                            |
| 60 | <b>8.2. <math>^{13}\text{C}</math> NMR spectrum of compound 6'S.</b>                         |
| 61 | <b>8.3. <math>^1\text{H}</math>-<math>^1\text{H}</math> COSY spectrums for compound 6'S.</b> |
| 62 | <b>8.4. HMBC spectrums for compound 6'S.</b>                                                 |
| 63 | <b>8.5. HSQC spectrums for compound 6'S.</b>                                                 |
| 64 | <b>8.6. MS diagram for compound 6'S.</b>                                                     |
| 65 | 9. NMR and MS spectrum of compound 1N.                                                       |
| 66 | <b>9.1. <math>^1\text{H}</math> NMR spectrum of compound 1N.</b>                             |
| 67 | <b>9.2. <math>^{13}\text{C}</math> NMR spectrum of compound 1N.</b>                          |
| 68 | <b>9.3. <math>^1\text{H}</math>-<math>^1\text{H}</math> COSY spectrums for compound 1N.</b>  |
| 69 | <b>9.4. HMBC spectrums for compound 1N.</b>                                                  |
| 70 | <b>9.5. HSQC spectrums for compound 1N.</b>                                                  |
| 71 | <b>9.6. MS diagram for compound 1N.</b>                                                      |
| 72 | 10. NMR spectrum of compound 2N.                                                             |
| 73 | <b>10.1. <math>^1\text{H}</math> NMR spectrum of compound 2N.</b>                            |
| 74 | <b>10.2. <math>^{13}\text{C}</math> NMR spectrum of compound 2N.</b>                         |
| 75 | <b>10.3. <math>^1\text{H}</math>-<math>^1\text{H}</math> COSY spectrums for compound 2N.</b> |
| 76 | <b>10.4. HMBC spectrums for compound 2N.</b>                                                 |

- 77 **10.5. HSQC spectrums for compound 2N.**
- 78 **10.6. MS diagram for compound 2N.**
- 79 11. NMR spectrum of compound 3N.
- 80 **11.1.  $^1\text{H}$  NMR spectrum of compound 3N.**
- 81 **11.2.  $^{13}\text{C}$  NMR spectrum of compound 3N.**
- 82 **11.3.  $^1\text{H}$ - $^1\text{H}$  COSY spectrums for compound 3N.**
- 83 **11.4. HMBC spectrums for compound 3N.**
- 84 **11.5. HSQC spectrums for compound 3N.**
- 85 **11.6. MS diagram for compound 3N.**
- 86 12. NMR spectrum of compound 4N.
- 87 **12.1.  $^1\text{H}$  NMR spectrum of compound 4N.**
- 88 **12.2.  $^{13}\text{C}$  NMR spectrum of compound 4N.**
- 89 **12.3. COSY spectrums for compound 4N.**
- 90 **12.4. HMBC spectrums for compound 4N.**
- 91 **12.5. HSQC spectrums for compound 4N.**
- 92 **12.6. MS diagram for compound 4N.**
- 93 13. NMR and MS spectrum of compound 5N.
- 94 **13.1.  $^1\text{H}$  NMR spectrum of compound 5N.**
- 95 **13.2.  $^{13}\text{C}$  NMR spectrum of compound 5N.**
- 96 **13.3. COSY spectrums for compound 5N.**
- 97 **13.4. HMBC spectrums for compound 5N.**
- 98 **13.5. HSQC spectrums for compound 5N.**
- 99 **13.6. MS diagram for compound 5N.**

|     |                                                                           |
|-----|---------------------------------------------------------------------------|
| 100 | 14. NMR and MS spectrum of compound 6N.                                   |
| 101 | <b>14.1. <sup>1</sup>H NMR spectrum of compound 6N.</b>                   |
| 102 | <b>14.2. <sup>13</sup>C NMR spectrum of compound 6N.</b>                  |
| 103 | <b>14.3. COSY spectrums for compound 6N.</b>                              |
| 104 | <b>14.4. HMBC spectrums for compound 6N.</b>                              |
| 105 | <b>14.5. HSQC spectrums for compound 6N.</b>                              |
| 106 | <b>13.6. MS diagram for compound 6N.</b>                                  |
| 107 | 15. NMR and MS spectrum of compound 1'N.                                  |
| 108 | <b>15.1. <sup>1</sup>H NMR spectrum of compound 1'N.</b>                  |
| 109 | <b>15.2. <sup>13</sup>C NMR spectrum of compound 1'N.</b>                 |
| 110 | <b>15.3. <sup>1</sup>H-<sup>1</sup>H COSY spectrums for compound 1'N.</b> |
| 111 | <b>15.4. HMBC spectrums for compound 1'N.</b>                             |
| 112 | <b>15.5. HSQC spectrums for compound 1'N.</b>                             |
| 113 | <b>15.6. MS diagram for compound 1'N.</b>                                 |
| 114 | 16. NMR spectrum of compound 2'N.                                         |
| 115 | <b>16.1. <sup>1</sup>H NMR spectrum of compound 2'N.</b>                  |
| 116 | <b>16.2. <sup>13</sup>C NMR spectrum of compound 2'N.</b>                 |
| 117 | <b>16.3. <sup>1</sup>H-<sup>1</sup>H COSY spectrums for compound 2'N.</b> |
| 118 | <b>16.4. HMBC spectrums for compound 2'N.</b>                             |
| 119 | <b>16.5. HSQC spectrums for compound 2'N.</b>                             |
| 120 | <b>16.6. MS diagram for compound 2'N.</b>                                 |
| 121 | 17. NMR spectrum of compound 3'N.                                         |
| 122 | <b>17.1. <sup>1</sup>H NMR spectrum of compound 3'N.</b>                  |



- 123 **17.2.  $^{13}\text{C}$  NMR spectrum of compound 3'N.**
- 124 **17.3.  $^1\text{H}$ - $^1\text{H}$  COSY spectrums for compound 3'N.**
- 125 **17.4. HMBC spectrums for compound 3'N.**
- 126 **17.5. HSQC spectrums for compound 3'N.**
- 127 **17.6. MS diagram for compound 3'N.**
- 128 18. NMR spectrum of compound 4'N.
- 129 **18.1.  $^1\text{H}$  NMR spectrum of compound 4'N.**
- 130 **18.2.  $^{13}\text{C}$  NMR spectrum of compound 4'N.**
- 131 **18.3. COSY spectrums for compound 4'N.**
- 132 **18.4. HMBC spectrums for compound 4'N.**
- 133 **18.5. HSQC spectrums for compound 4'N.**
- 134 **18.6. MS diagram for compound 4'N.**
- 135 19. NMR and MS spectrum of compound 5'N.
- 136 **19.1.  $^1\text{H}$  NMR spectrum of compound 5'N.**
- 137 **19.2.  $^{13}\text{C}$  NMR spectrum of compound 5'N.**
- 138 **19.3. COSY spectrums for compound 5'N.**
- 139 **19.4. HMBC spectrums for compound 5'N.**
- 140 **19.5. HSQC spectrums for compound 5'N.**
- 141 **19.6. MS diagram for compound 5'N.**
- 142 20. NMR and MS spectrum of compound 6'N.
- 143 **20.1.  $^1\text{H}$  NMR spectrum of compound 6'N.**
- 144 **20.2.  $^{13}\text{C}$  NMR spectrum of compound 6'N.**
- 145 **20.3. COSY spectrums for compound 6'N.**

146 **20.4. HMBC spectrums for compound 6'N.**

147 **20.5. HSQC spectrums for compound 6'N.**

148 **20.6. MS diagram for compound 6'N.**

149

150

151

152

153

154

155

156

157

158

159

160

161

162

163

164

165

166

167

168

169  
170  
171

**Copies of  $^1\text{H}$ ,  $^{13}\text{C}$  NMR and 2D NMR ( $^1\text{H}$ - $^1\text{H}$  COSY, HMBC, HSQC) Spectra**

1.1.  $^1\text{H}$  NMR spectrum of compound 3S.

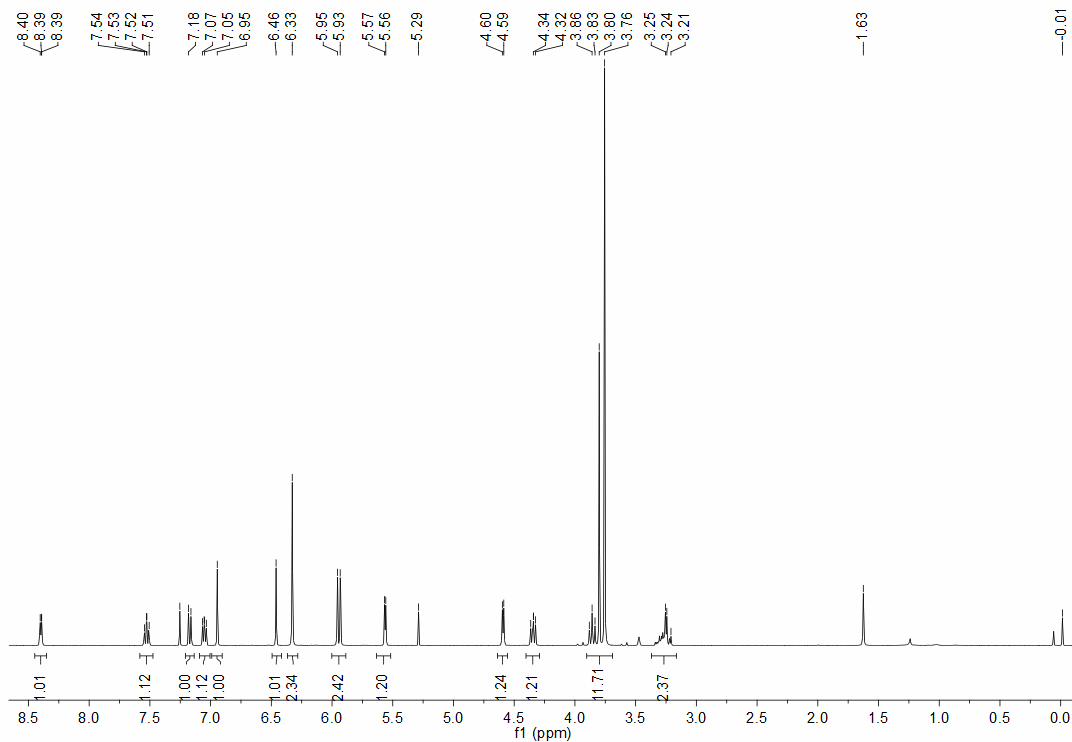

172  
173

1.2.  $^{13}\text{C}$  NMR spectrum of compound 3S.

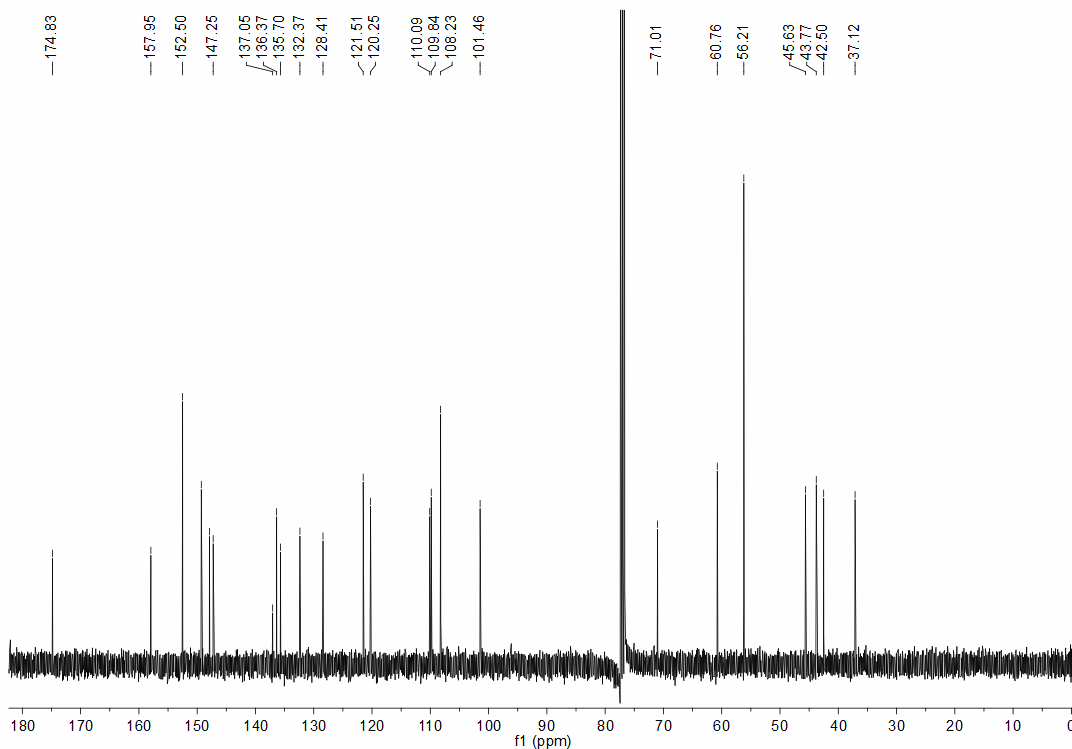

174  
175  
176  
177  
178  
179

180  
181

1.3.  $^1\text{H}$ - $^1\text{H}$  COSY diagram of compound 3S.

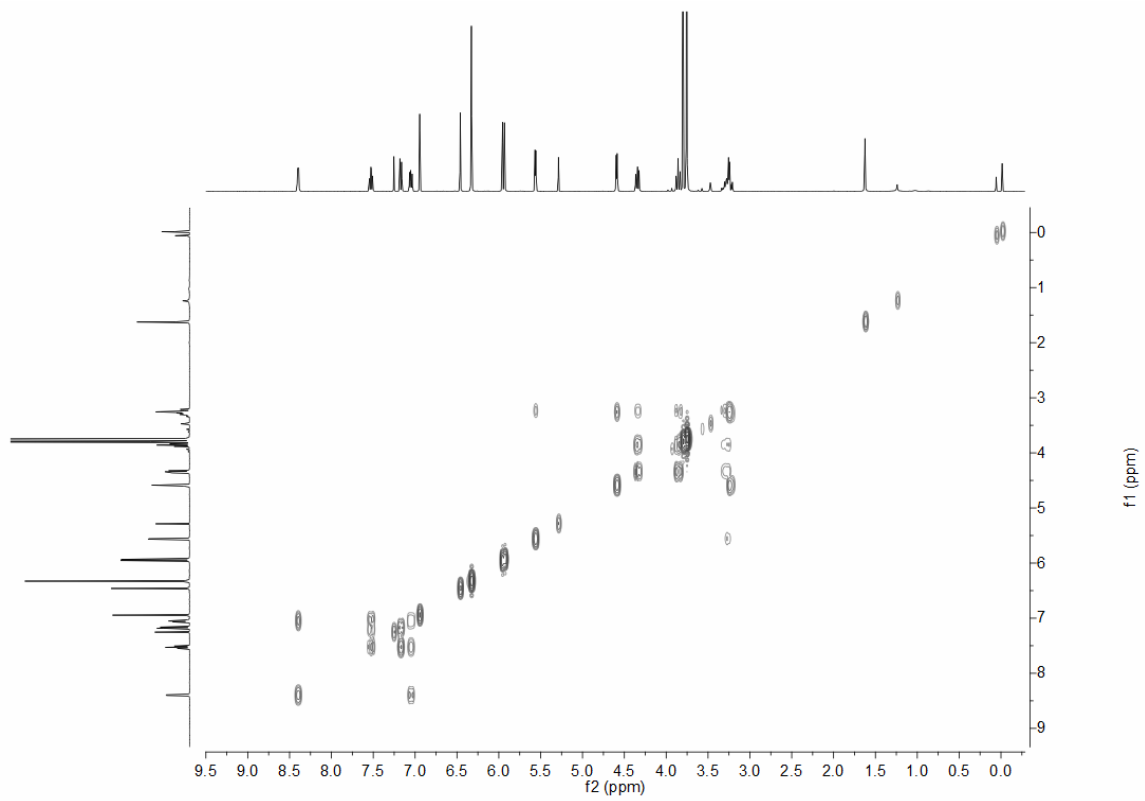

182  
183  
184

1.4. HMBC diagram of compound 3S.

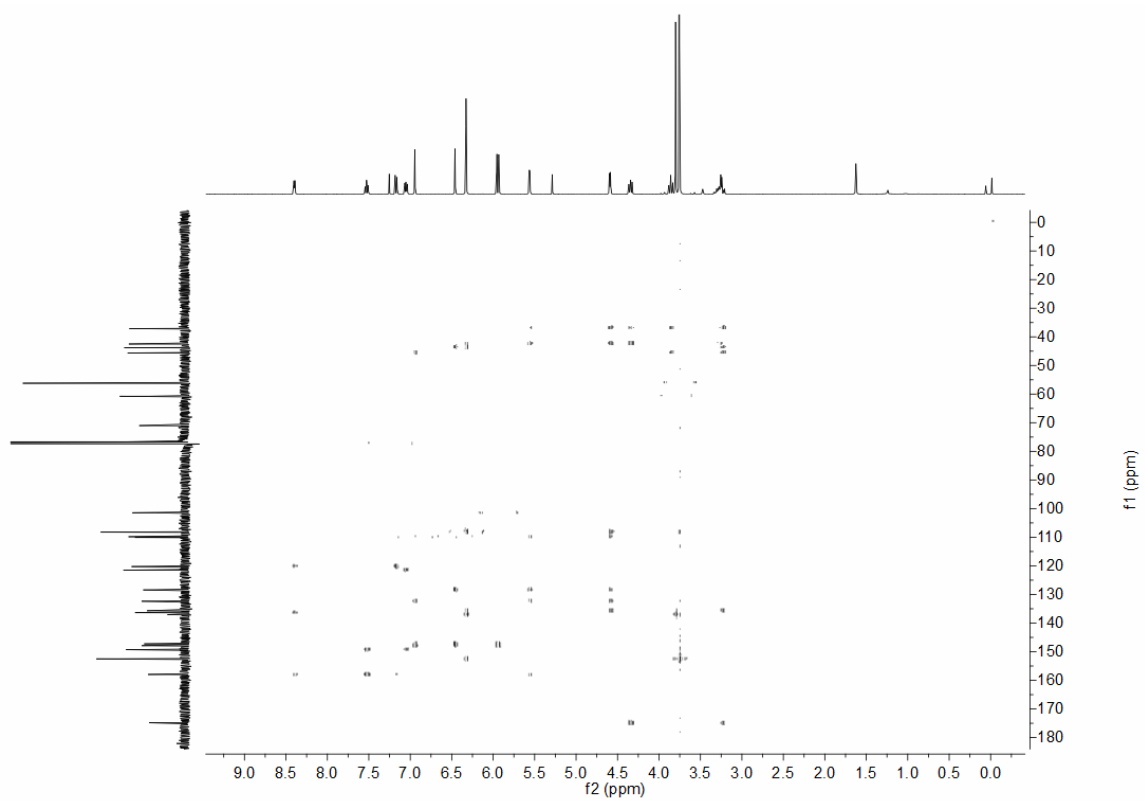

185  
186  
187  
188

## 1.5. HSQC diagram of compound 3S.

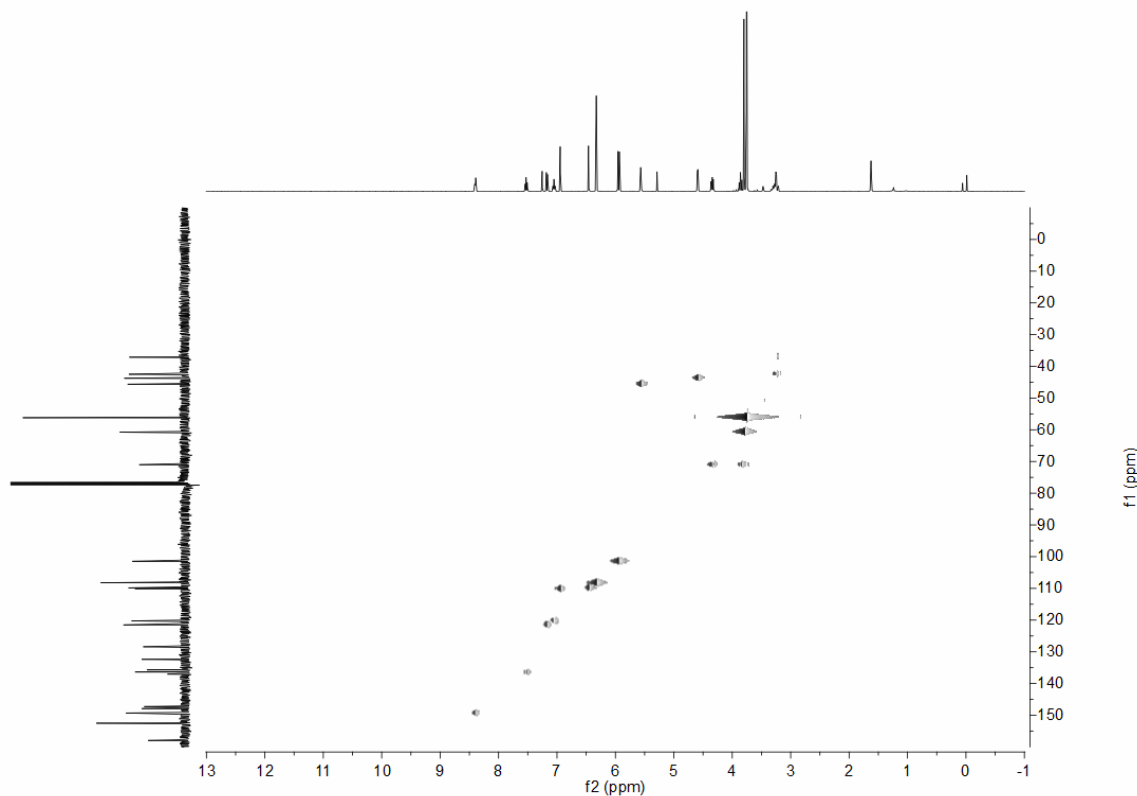

190

191

192

## 1.6. MS spectrum of compound 3S.

193

194

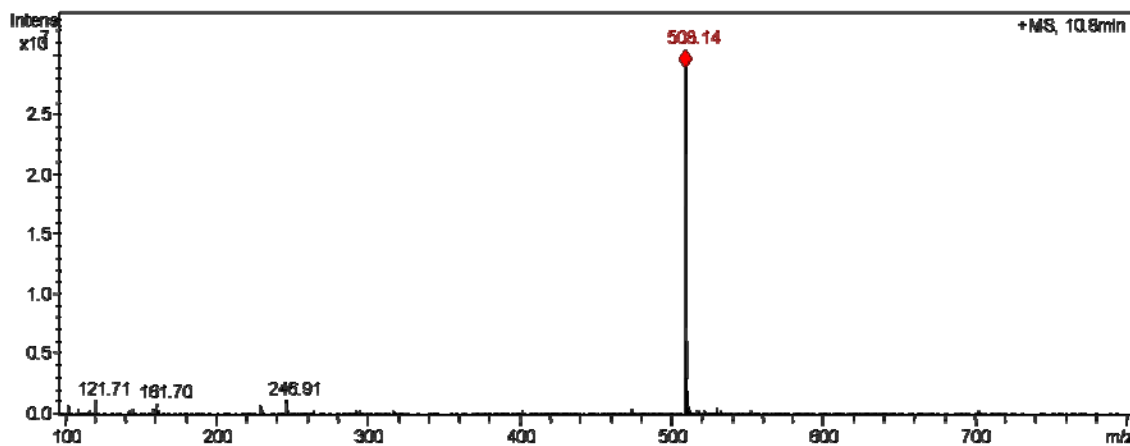

195

196

197 4 $\beta$ -S-(pyridine-2)-4-deoxy-podophyllotoxin (3S).

198  $^1\text{H}$  NMR (400 MHz,  $\text{CDCl}_3$ ,  $\delta$ ): 8.40 (d,  $J = 4.0$  Hz, 1H), 7.52 (t,  $J = 4.0$  Hz, 1H), 7.18 (d,  $J = 8.0$  Hz, 1H), 7.05  
 199 (t,  $J = 4.0$  Hz, 1H), 6.95 (s, 1H), 6.46 (s, 1H), 6.33 (s, 2H), 5.95 (d,  $J = 8.0$  Hz, 2H), 5.57 (d,  $J = 4.0$  Hz, 1H),  
 200 4.60 (d,  $J = 4.0$  Hz, 1H), 4.34 (t,  $J = 8.0$  Hz, 1H), 3.86 (t,  $J = 8.0$  Hz, 1H), 3.80 (s, 3H), 3.76 (s, 6H), 3.25-3.21  
 201 (m, 2H);  $^{13}\text{C}$  NMR (101 MHz,  $\text{CDCl}_3$ ,  $\delta$ ): 174.83, 157.95, 152.50 (2C), 147.99, 147.89, 147.25, 137.05, 136.37,  
 202 135.70, 132.37, 128.41, 121.51, 120.25, 110.09, 109.84, 108.23 (2C), 101.46, 71.01, 60.76, 56.21 (2C), 45.63,  
 203 43.77, 42.50, 37.12.

204 ESI-MS: calc'd for  $\text{C}_{27}\text{H}_{25}\text{NO}_7\text{S}$   $[\text{M}+\text{H}]^+$ : 508.14, found 508.14  $[\text{M}+\text{H}]^+$ .

205

### 2.1. <sup>1</sup>H NMR spectrum of compound 4S.

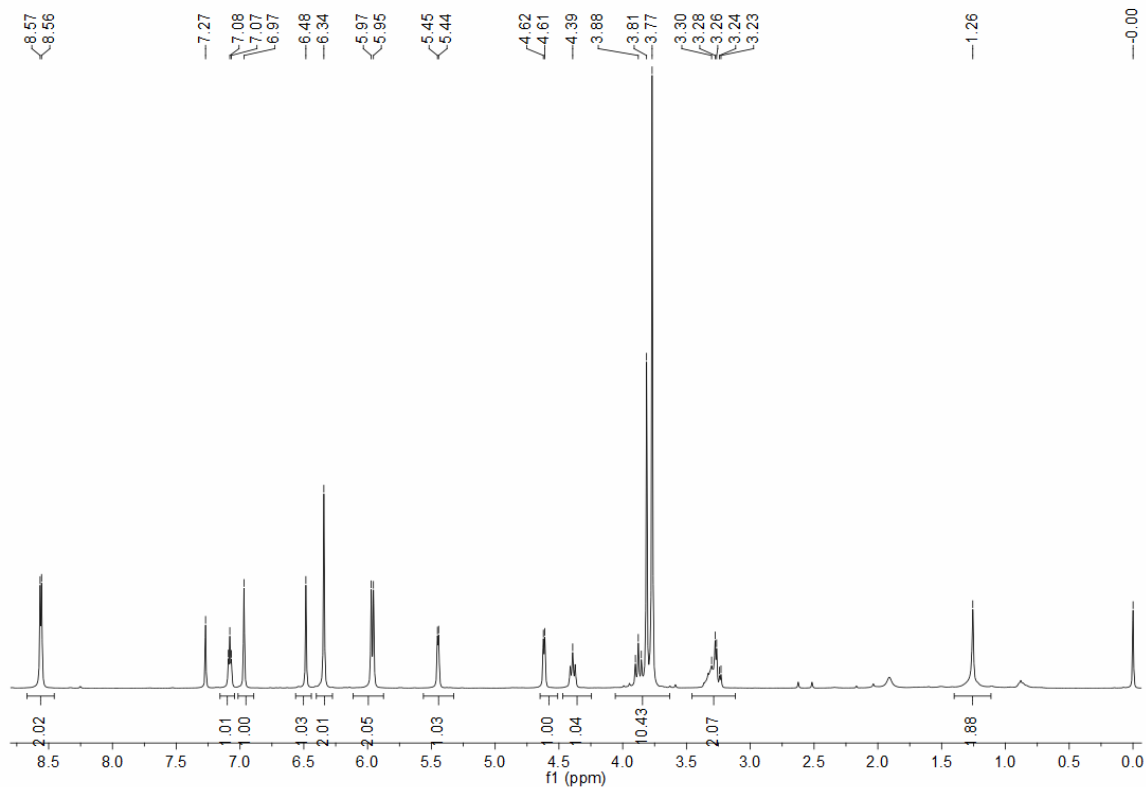

206

207

208

### 2.2. <sup>13</sup>C NMR spectrum of compound 4S.

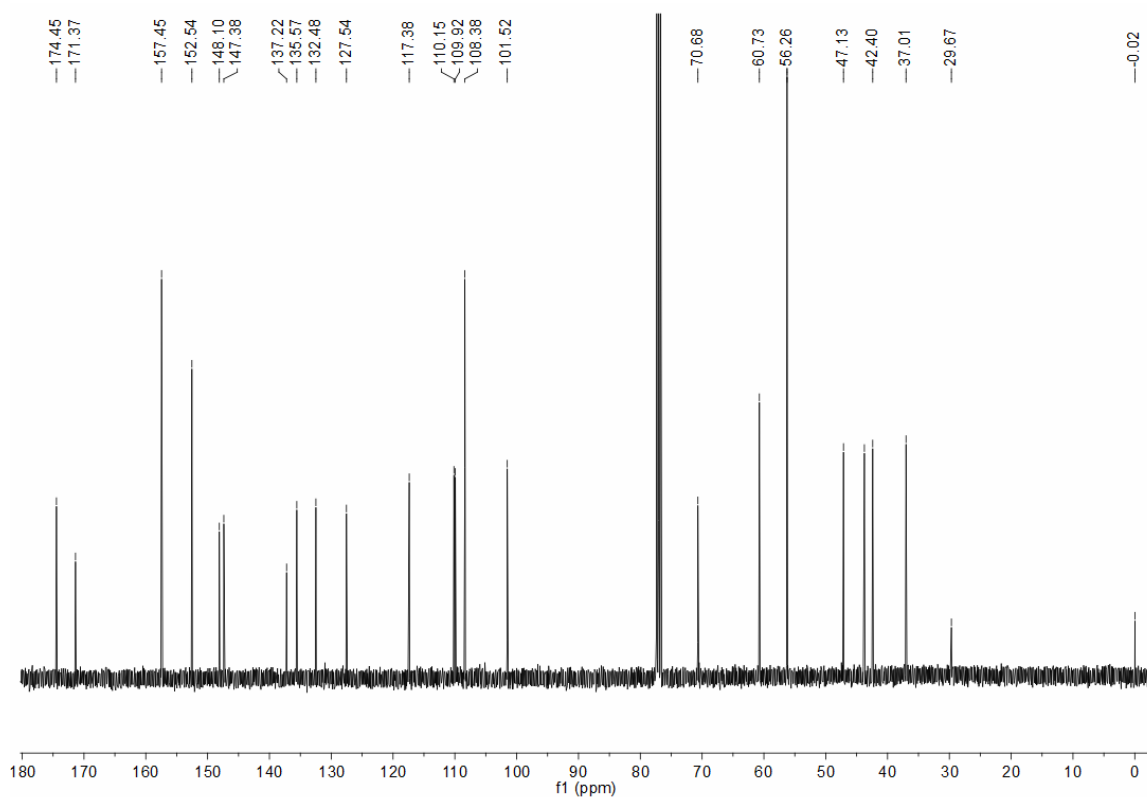

209

210

211

212

213

214

215

2.3.  $^1\text{H}$ - $^1\text{H}$  COSY diagram of compound 4S.

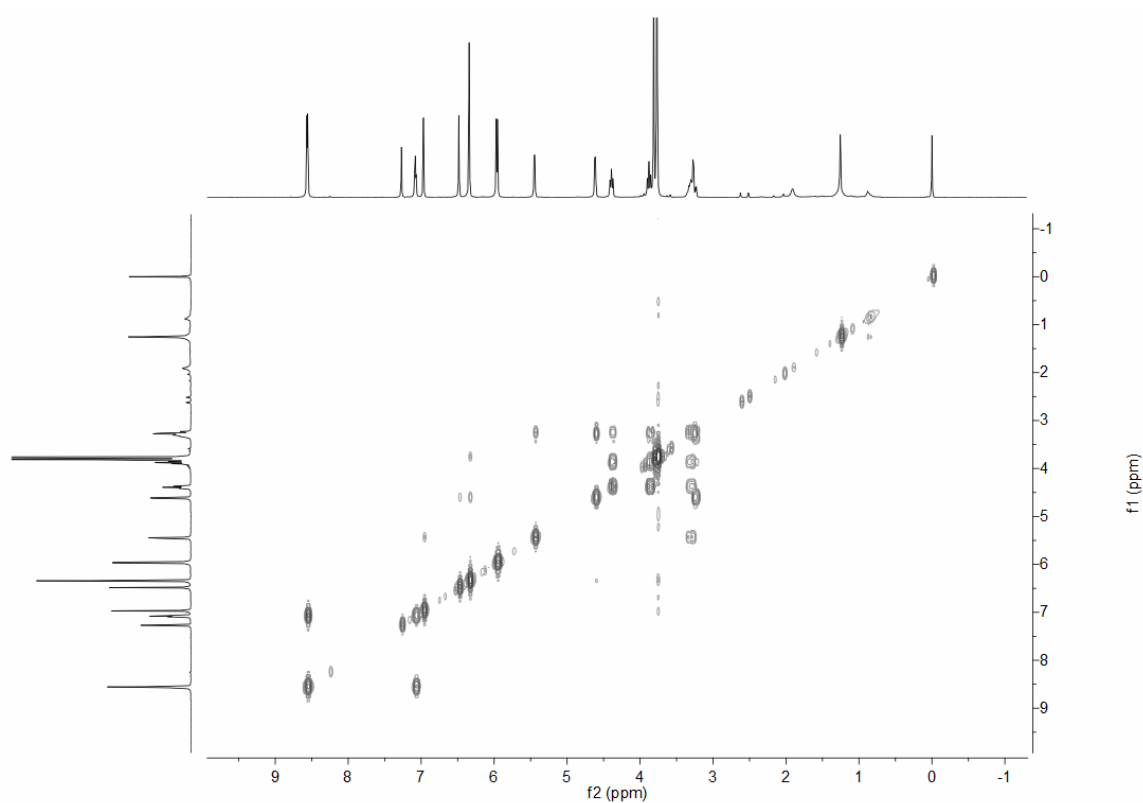

216

217

218

219

2.4. HMBC diagram of compound 4S.

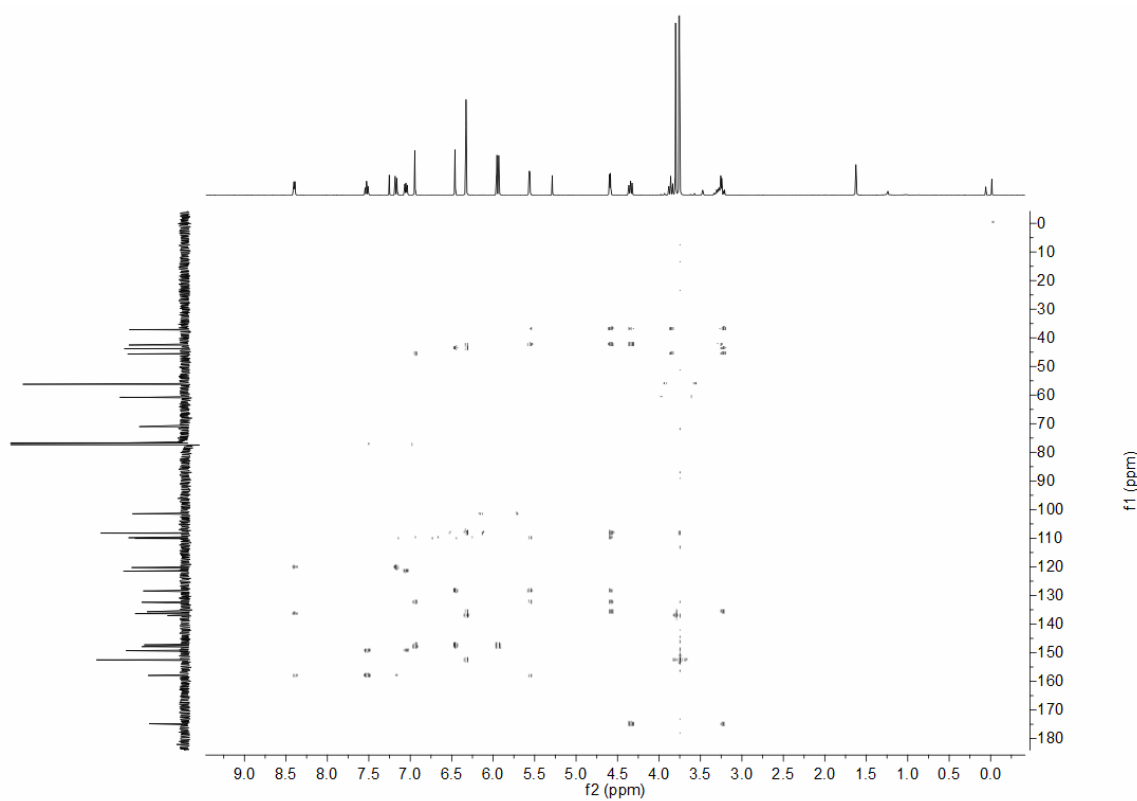

220

221

222

223  
224

## 2.5. HSQC diagram of compound 4S.

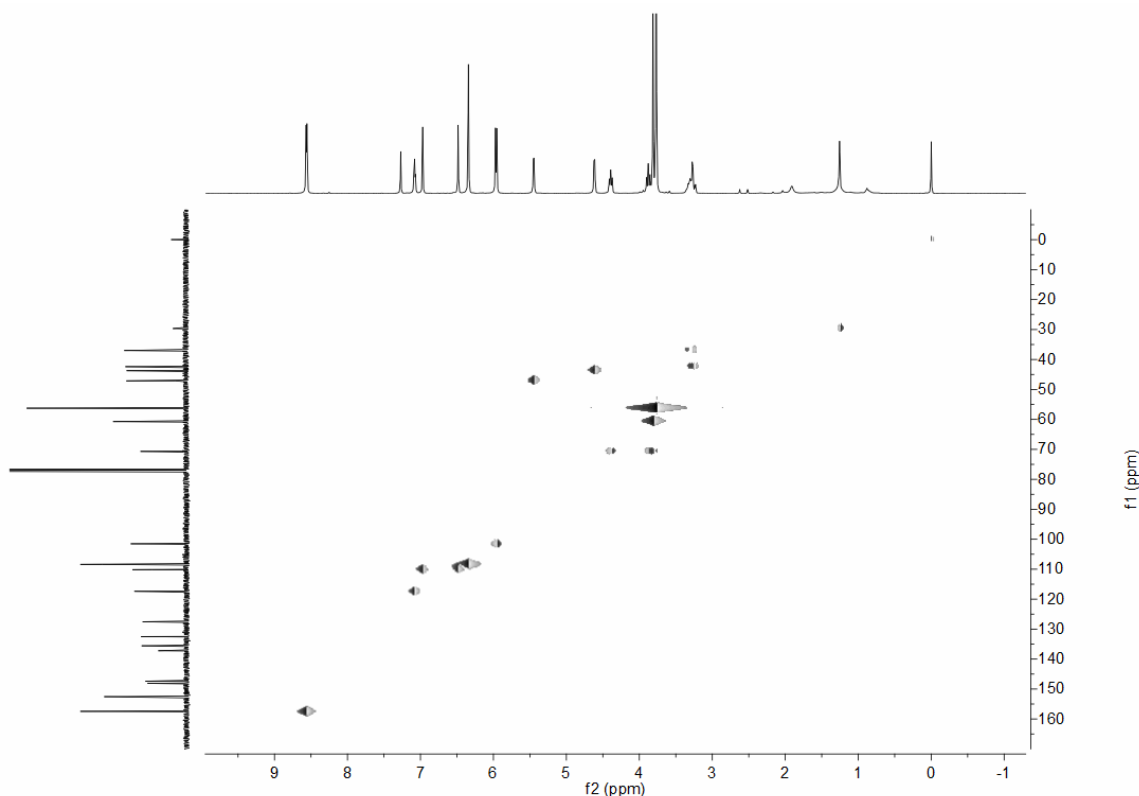

225  
226  
227

## 2.6. MS spectrum of compound 4S.

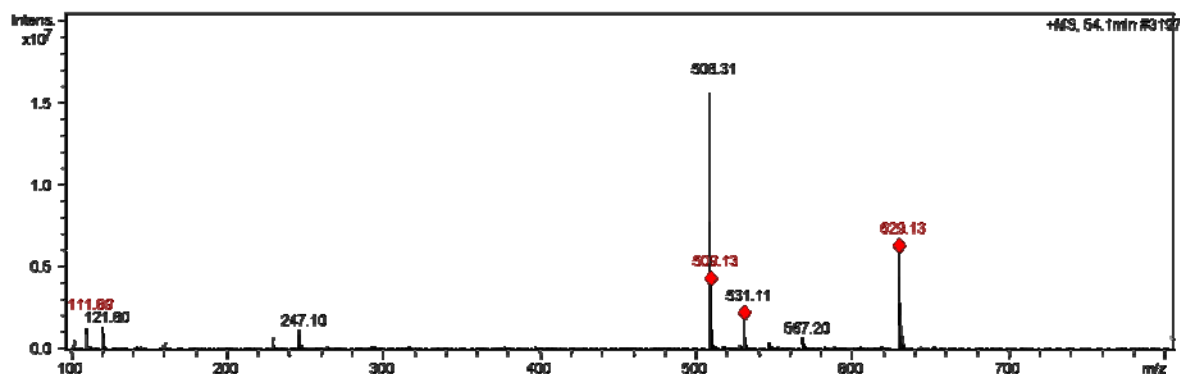

228  
229  
230  
231  
232  
233  
234  
235  
236  
237  
238  
239  
240

4 $\beta$ -S-(pyrimidine-2)-4-deoxy-podophyllotoxin (4S)

$^1\text{H}$  NMR (400 MHz,  $\text{CDCl}_3$ ,  $\delta$ ): 8.57 (d,  $J = 4.0$  Hz, 2H), 7.08 (t,  $J = 4.0$  Hz, 1H), 6.97 (s, 1H), 6.48 (s, 1H), 6.34 (s, 2H), 5.97 (d,  $J = 8.0$  Hz, 2H), 5.45 (d,  $J = 4.0$  Hz, 1H), 4.62 (d,  $J = 4.0$  Hz, 1H), 4.39 (t,  $J = 8.0$  Hz, 1H), 3.88 (t,  $J = 8.0$  Hz, 1H), 3.81 (s, 3H), 3.77 (s, 6H), 3.30-3.23 (m, 2H);  $^{13}\text{C}$  NMR (101 MHz,  $\text{CDCl}_3$ ,  $\delta$ ): 174.45, 171.37, 157.45 (2C), 152.54 (2C), 148.10, 147.38, 137.22, 135.57, 132.48, 127.54, 117.38, 110.15, 109.92, 108.38 (2C), 101.52, 70.68, 60.73, 56.26 (2C), 47.13, 43.75, 42.40, 37.01.

ESI-MS: calc'd for  $\text{C}_{26}\text{H}_{24}\text{N}_2\text{O}_7\text{S}$   $[\text{M}+\text{H}]^+$ : 508.13, found 508.31  $[\text{M}+\text{H}]^+$ ; calc'd for  $\text{C}_{26}\text{H}_{24}\text{N}_2\text{O}_7\text{S}$   $[\text{M}+\text{H}]^+$ : 509.54, found 509.13  $[\text{M}+2\text{H}]^+$ ; calc'd for  $\text{C}_{26}\text{H}_{24}\text{N}_2\text{O}_7\text{S}$   $[\text{M}+\text{Na}]^+$ : 531.53, found 531.11  $[\text{M}+\text{Na}]^+$ ; calc'd for  $\text{C}_{26}\text{H}_{24}\text{N}_2\text{O}_7\text{S}$   $[\text{M}+2\text{Na}+2\text{K}-2\text{H}]^+$ : 629.16, found 629.13  $[\text{M}+2\text{Na}+2\text{K}-2\text{H}]^+$ .



241

### 3.1. <sup>1</sup>H NMR spectrum of compound 5S.

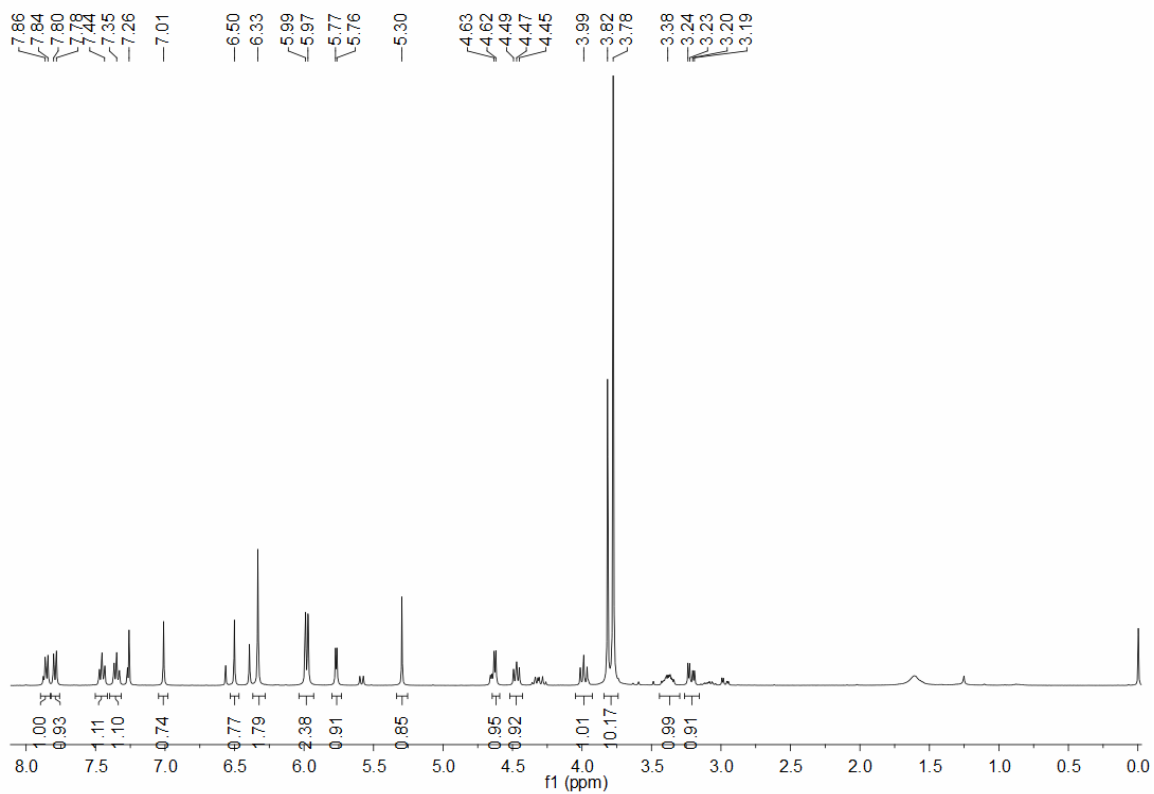

242

243

244

### 3.2. <sup>13</sup>C NMR spectrum of compound 5S.

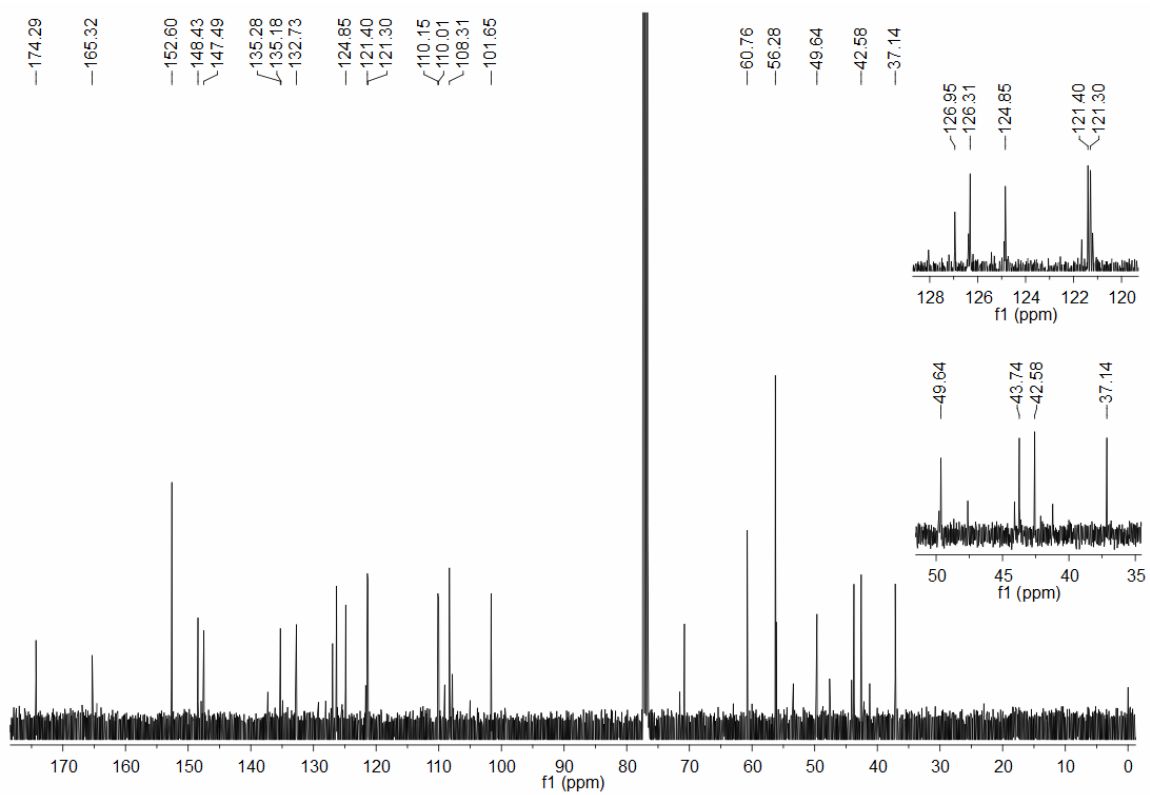

245

246

247

248

249

250

### 3.3. $^1\text{H}$ - $^1\text{H}$ COSY spectrums for compound 5S.

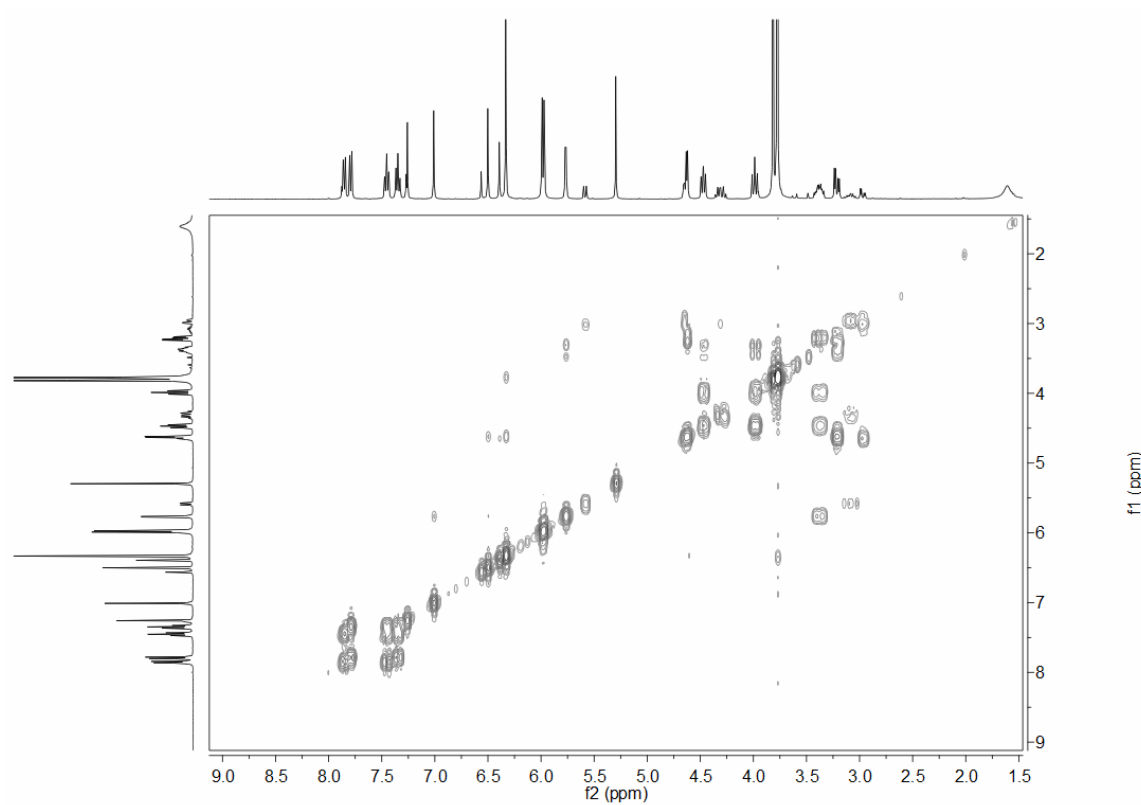

251

252

253

### 3.4. HMBC spectrums for compound 5S.

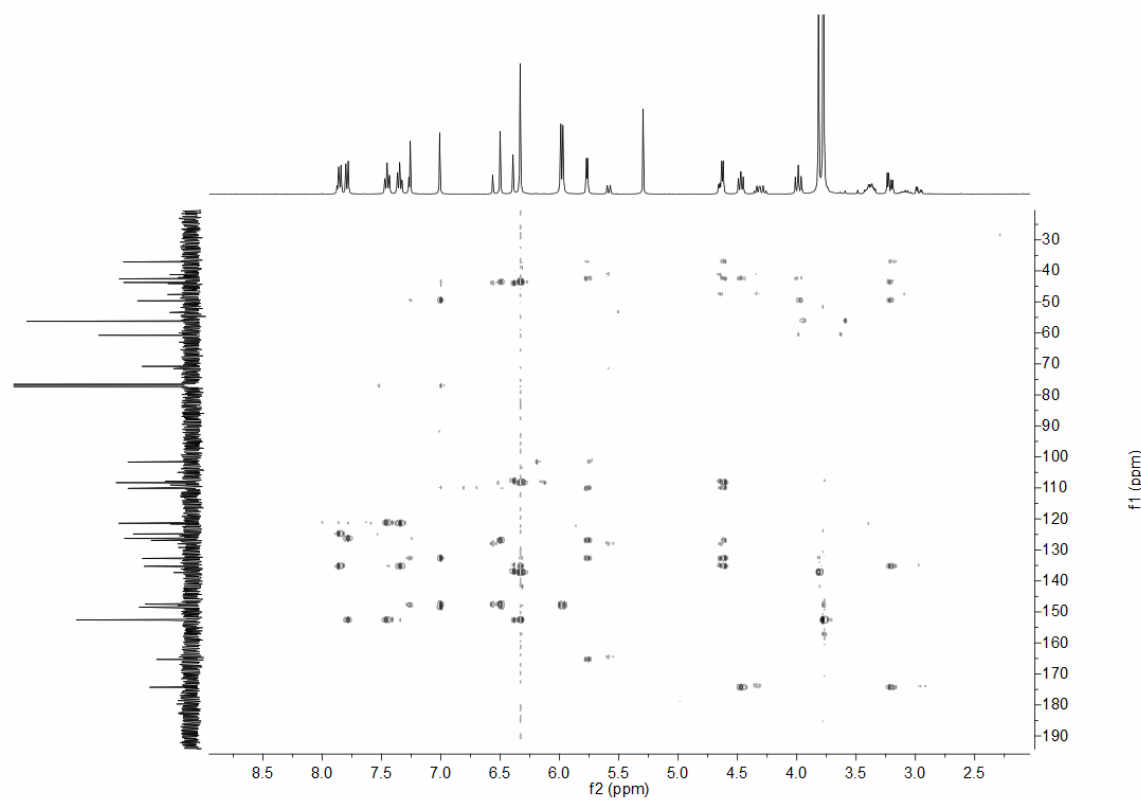

254

255

256

257

## 3.5. HSQC spectrums for compound 5S.

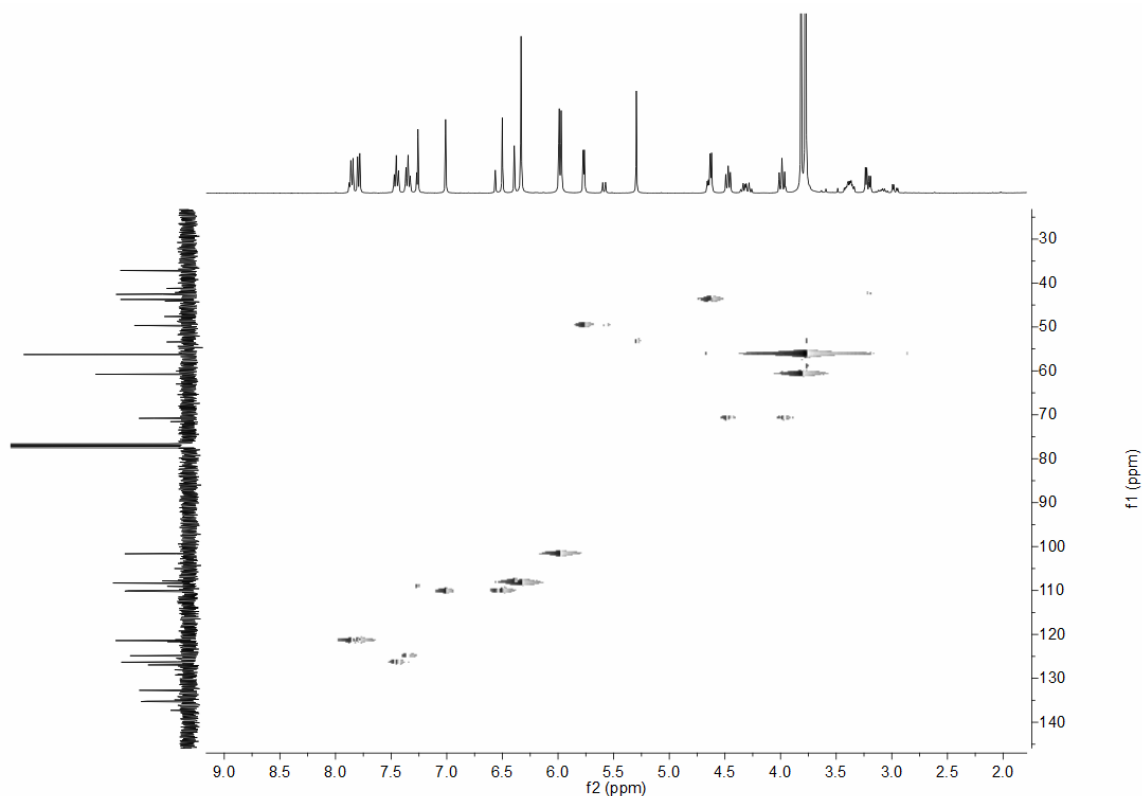

258

259

## 3.6. MS spectrum of compound 5S.

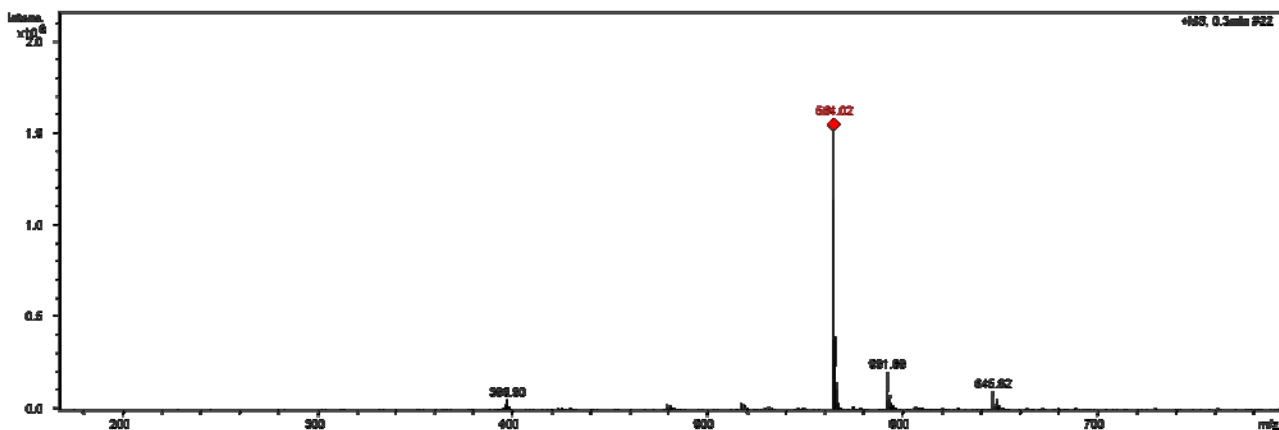

260

261 4 $\beta$ -S-(benzothiazole-2)-4-deoxy-podophyllotoxin (5S)

262  $^1\text{H}$  NMR (400 MHz,  $\text{CDCl}_3$ ,  $\delta$ ): 7.86 (d,  $J = 8.0$  Hz, 1H), 7.80 (d,  $J = 8.0$  Hz, 1H), 7.45 (t,  $J = 8.0$  Hz, 1H), 7.35  
 263 (t,  $J = 8.0$  Hz, 1H), 7.01 (s, 1H), 6.50 (s, 1H), 6.33 (s, 2H), 6.99 (d,  $J = 8.0$  Hz, 2H), 5.77 (d,  $J = 4.0$  Hz, 1H),  
 264 4.63 (d,  $J = 4.0$  Hz, 1H), 4.47 (t,  $J = 8.0$  Hz, 1H), 3.99 (t,  $J = 8.0$  Hz, 1H), 3.82 (s, 3H), 3.78 (s, 6H), 3.43-3.34  
 265 (m, 1H), 3.24-3.19 (m, 1H);  $^{13}\text{C}$  NMR (101 MHz,  $\text{CDCl}_3$ ,  $\delta$ ): 174.29, 165.32, 152.60 (2C), 148.43 (2C), 147.49,  
 266 135.28, 135.18, 132.73, 126.95, 126.31, 124.85 (2C), 121.40, 121.30, 110.15, 110.01, 108.31 (2C), 101.65, 70.79,  
 267 60.76, 56.28 (2C), 49.64, 43.74, 42.58, 37.14.

268 ESI-MS: calc'd for  $\text{C}_{29}\text{H}_{25}\text{NO}_7\text{S}_2$   $[\text{M}+\text{H}]^+$ : 564.11, found 564.02  $[\text{M}+\text{H}]^+$ .

269

270

271

272

273

4.1.  $^1\text{H}$  NMR spectrum of compound 6S.

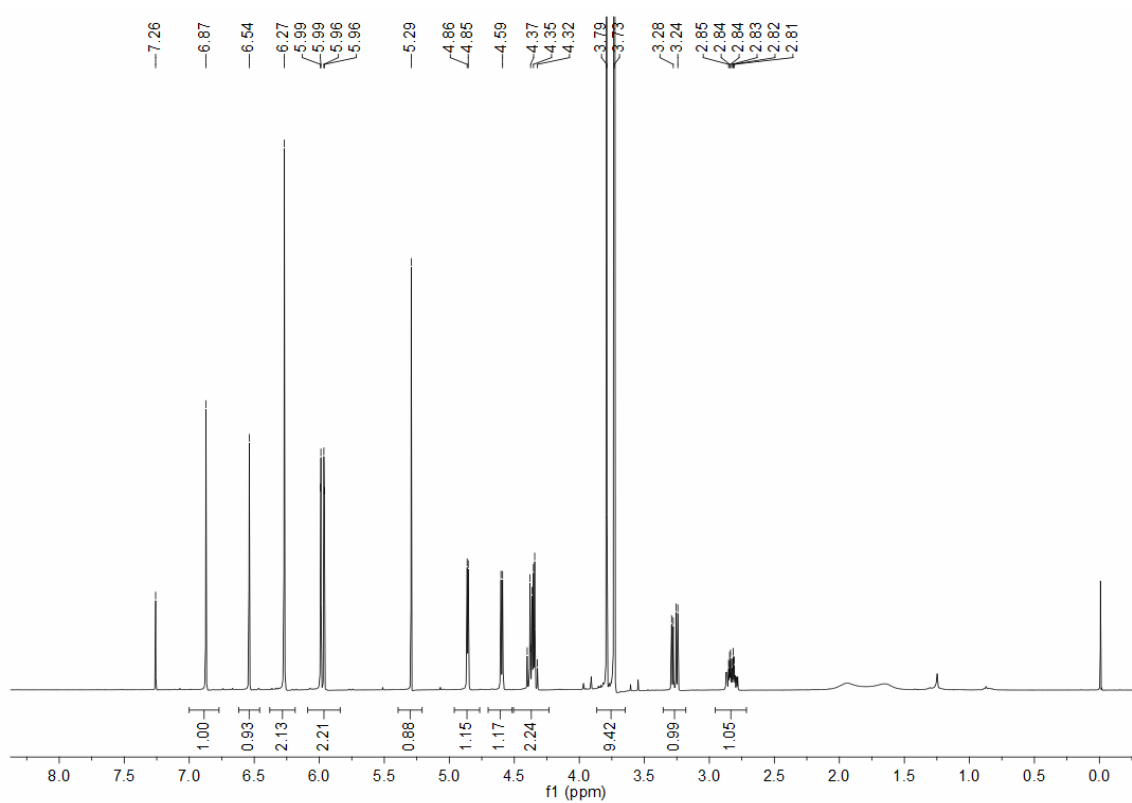

274

275

4.2.  $^{13}\text{C}$  NMR spectrum of compound 6S.

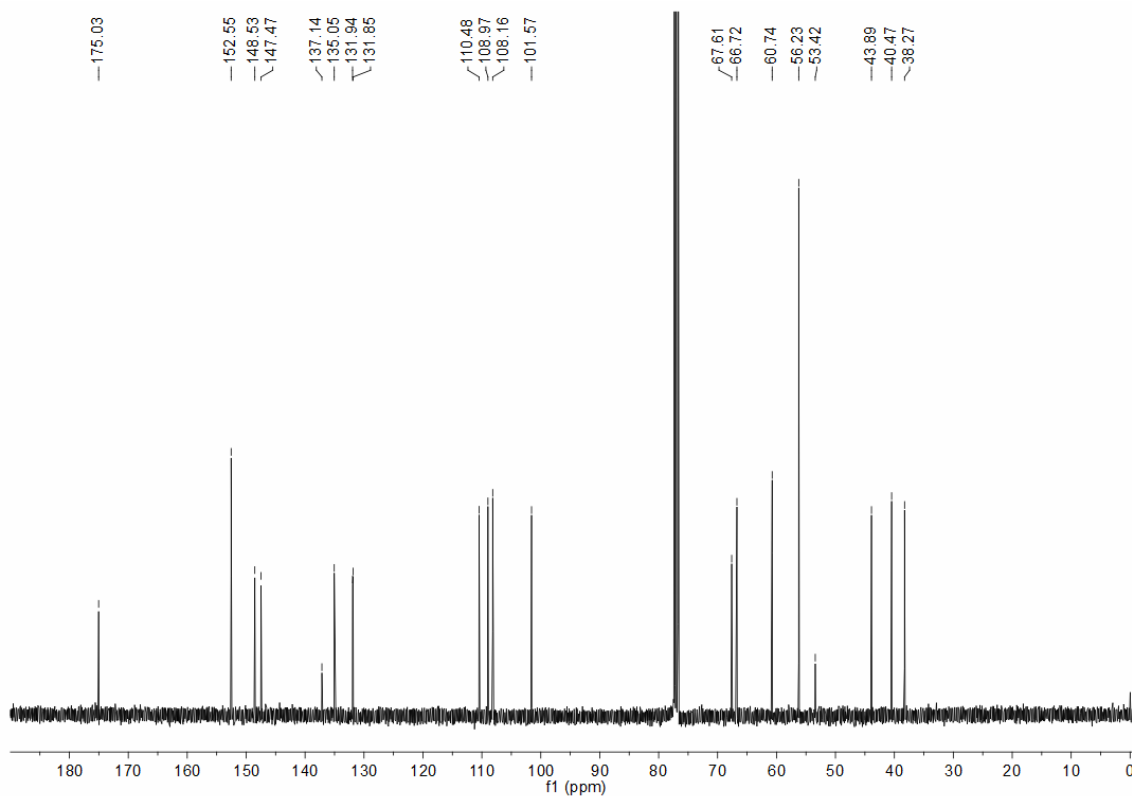

276

277

278

279

### 4.3. $^1\text{H}$ - $^1\text{H}$ COSY spectrums for compound 6S.

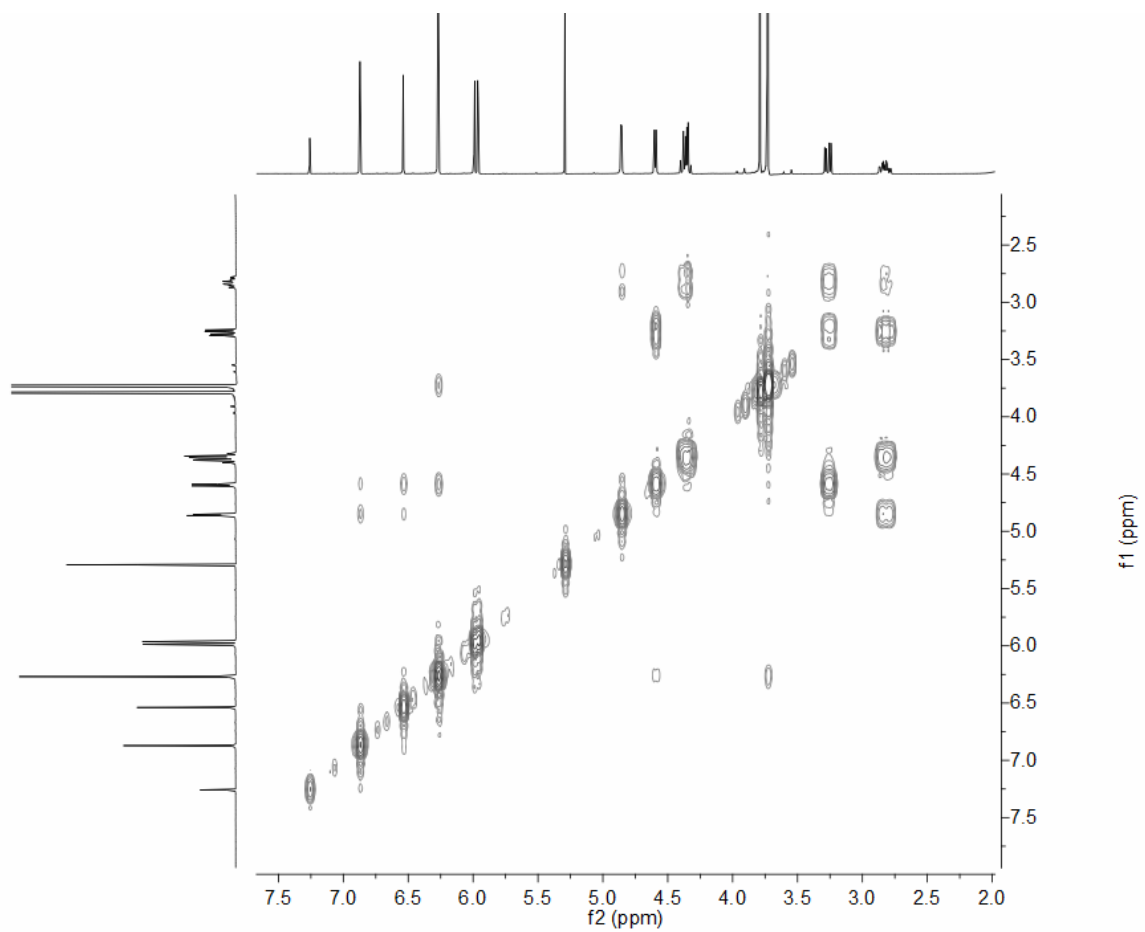

280

281

### 4.4. HMBC spectrums for compound 6S.

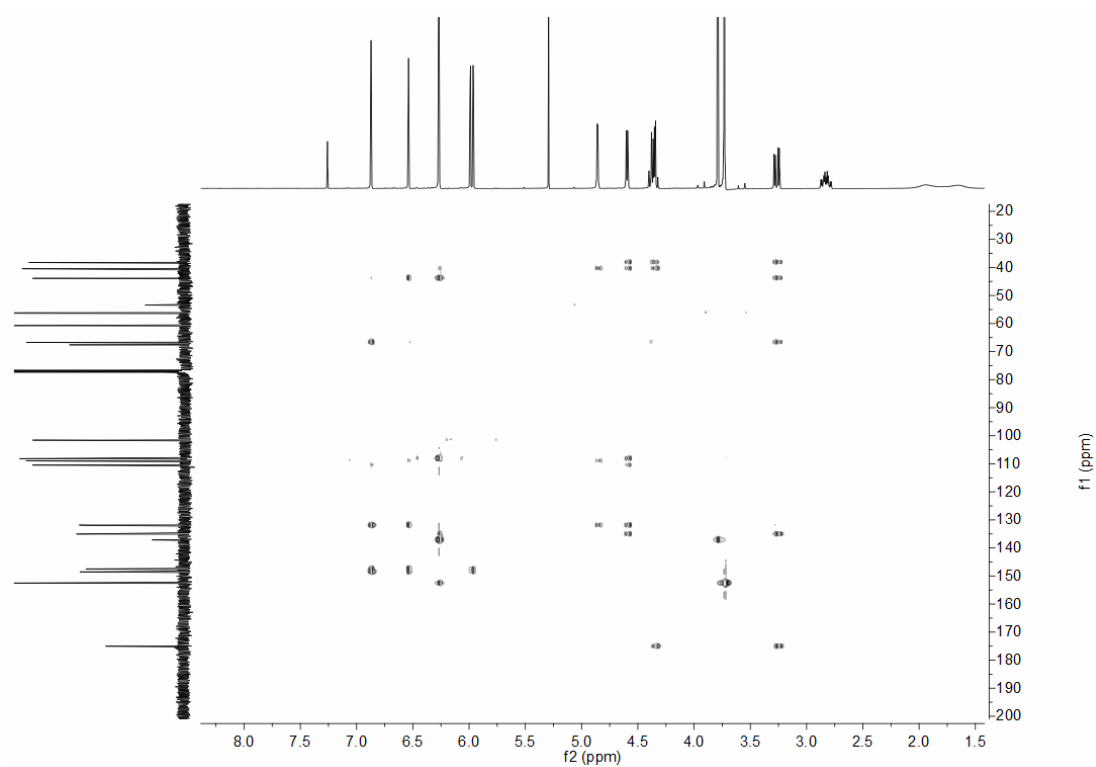

282

283

## 4.5. HSQC spectrums for compound 6S.

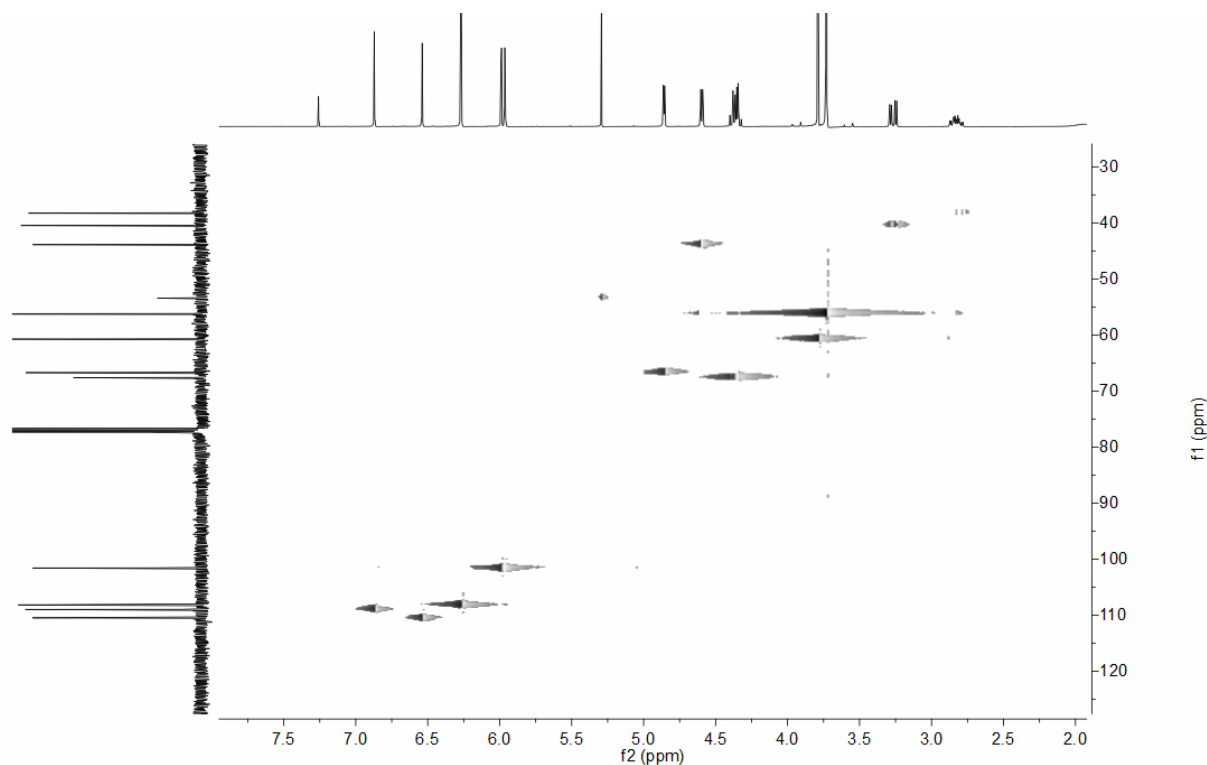

284

285

## 4.6. MS spectrum of compound 6S.

286

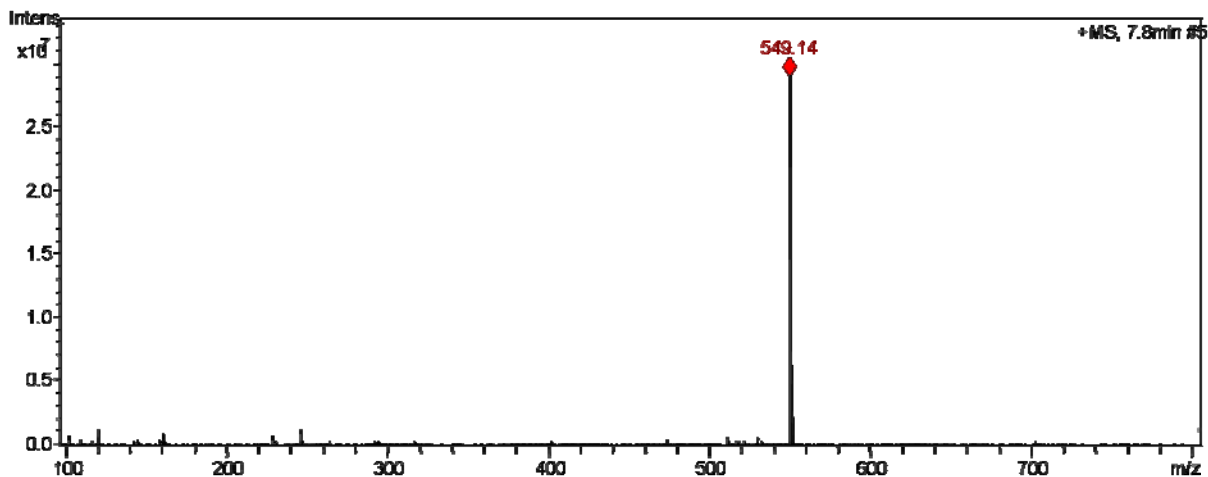

287

288

289 4 $\beta$ -S-(purine-6)-4-deoxy-podophyllotoxin (6S)

290  $^1\text{H}$  NMR (300 MHz,  $\text{CDCl}_3$ ,  $\delta$ ): 6.87 (s, 1H), 6.54 (s, 1H), 6.27 (s, 2H), 5.99 (d,  $J = 9.0$  Hz, 2H), 5.29 (s, 1H),  
 291 4.86 (d,  $J = 9.0$  Hz, 1H), 4.59 (d,  $J = 9.0$  Hz, 1H), 4.37 - 4.32 (m, 1H), 3.79 (s, 3H), 3.73 (s, 6H), 3.28 (dd,  $J_1 =$   
 292 16.0 Hz,  $J_2 = 6.0$  Hz, 1H), 3.212-3.177 (m, 1H);  $^{13}\text{C}$  NMR (75 MHz,  $\text{CDCl}_3$ ,  $\delta$ ): 175.03 (2C), 152.55 (2C),  
 293 148.53, 147.47 (2C), 137.14, 135.05 (2C), 131.94, 131.85, 110.48 (2C), 108.97, 108.16 (2C), 67.61, 66.72, 60.74,  
 294 56.23 (2C), 53.42, 47.258, 43.89, 40.47, 38.27.

295 ESI-MS: calc'd for  $\text{C}_{27}\text{H}_{24}\text{N}_4\text{O}_7\text{S}$   $[\text{M}+\text{H}]^+$ : 549.14, found 549.14  $[\text{M}+\text{H}]^+$ .

296

297

5.1.  $^1\text{H}$  NMR spectrum of compound 3'S.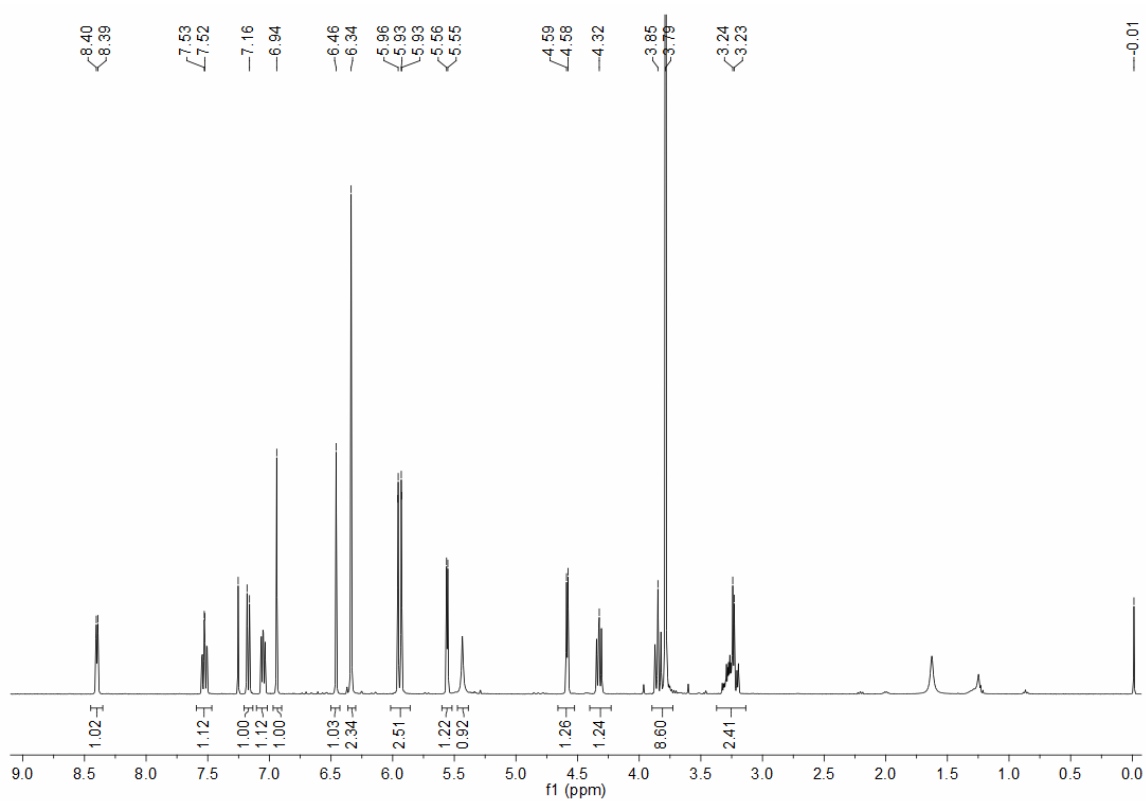

299

300

301

5.2.  $^{13}\text{C}$  NMR spectrum of compound 3'S.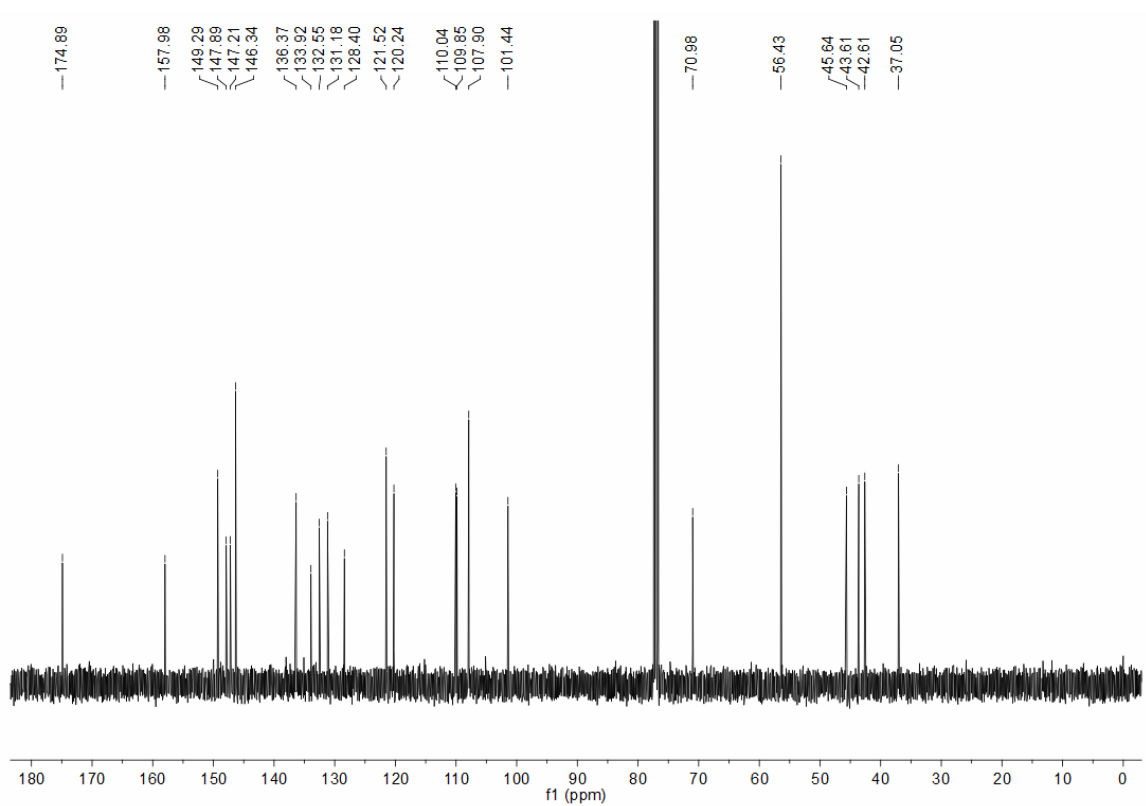

302

303

304

305

306

307

### 5.3. $^1\text{H}$ - $^1\text{H}$ COSY spectrums for compound 3'S.

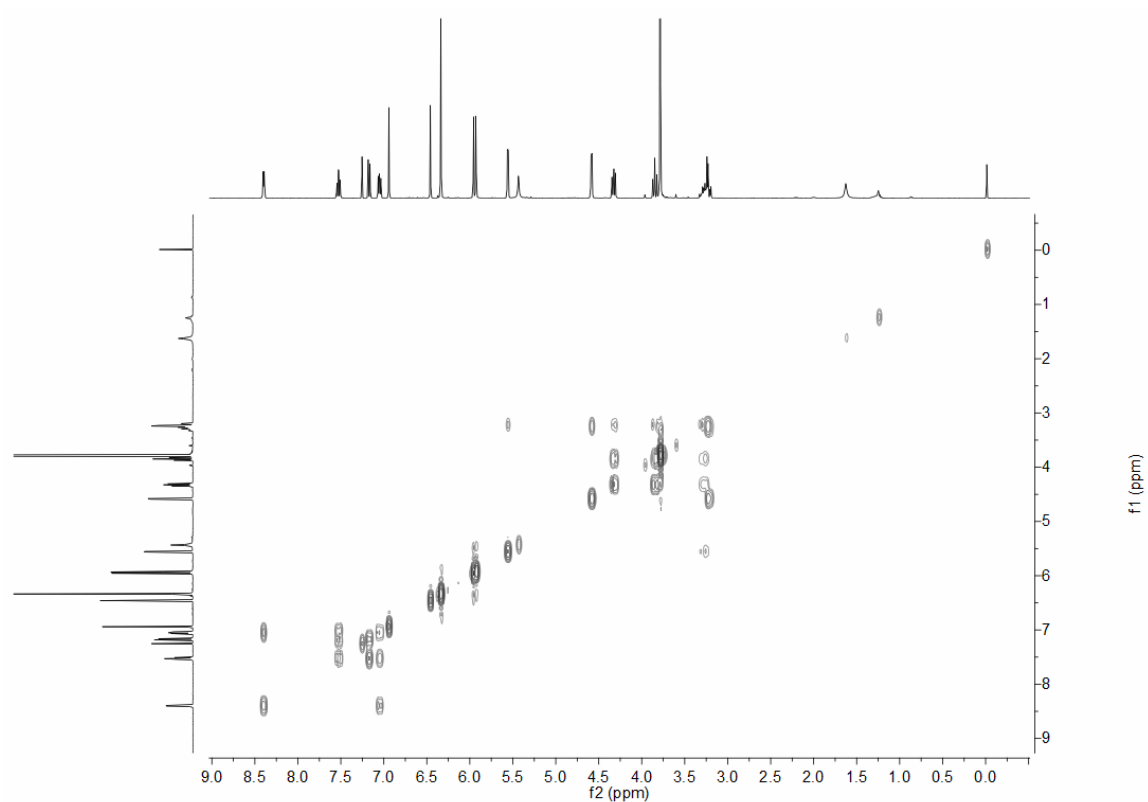

308

309

310

### 5.4. HMBC spectrums for compound 3'S.

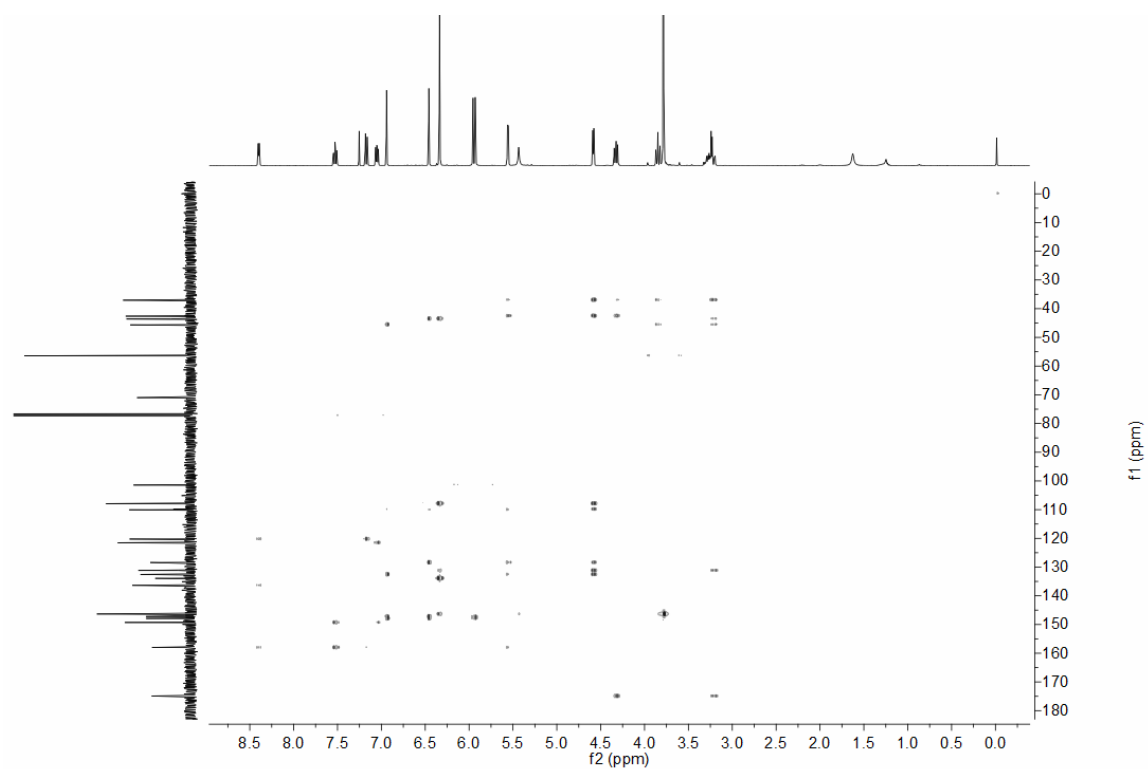

311

312

313

314



315

316

## 5.5. HSQC spectrums for compound 3'S.

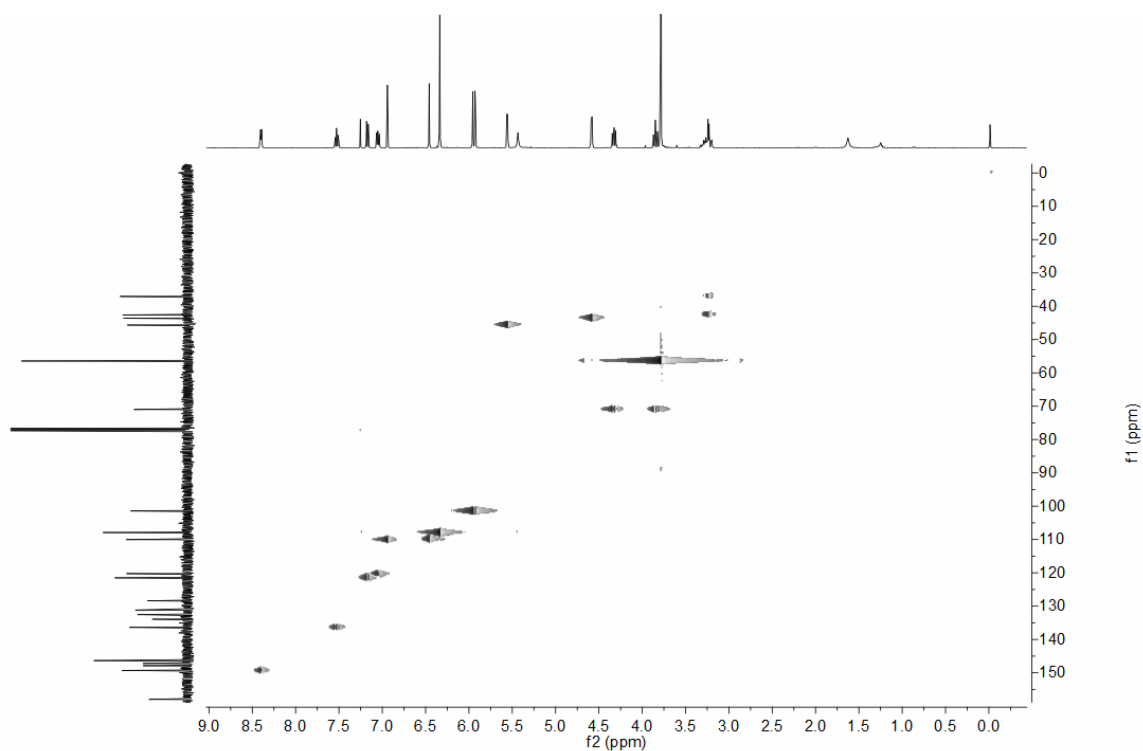

317

318

## 5.6. MS spectrum of compound 3'S.

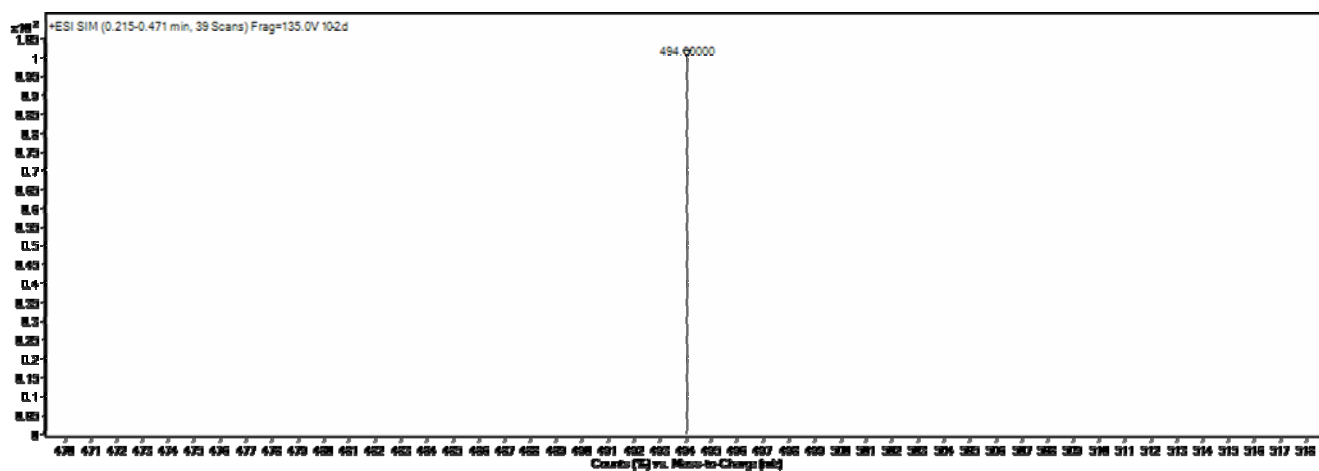

319

320

321

4 $\beta$ -S-(pyridine-2)-4-deoxy-4'-demethyl-podophyllotoxin (3'S)

322

<sup>1</sup>H NMR (400 MHz, CDCl<sub>3</sub>,  $\delta$ ): 8.40 (d,  $J$  = 4.0 Hz, 1H), 7.52 (t,  $J$  = 8.0 Hz, 1H), 7.18 (d,  $J$  = 8.0 Hz, 1H), 7.05 (t,  $J$  = 8.0 Hz, 1H), 6.94 (s, 1H), 6.46 (s, 1H), 6.34 (s, 2H), 5.96 (d,  $J$  = 12.0 Hz, 2H), 5.56 (d,  $J$  = 4.0 Hz, 1H), 5.35 (s, 1H), 4.59 (d,  $J$  = 4.0 Hz, 1H), 4.33 (t,  $J$  = 8.0 Hz, 1H), 3.85 (t,  $J$  = 8.0 Hz, 1H), 3.79 (s, 6H), 3.33-3.20 (m, 2H); <sup>13</sup>C NMR (101 MHz, CDCl<sub>3</sub>,  $\delta$ ): 174.89, 157.98, 149.29, 147.89, 147.21, 146.34 (2C), 136.37, 133.92, 132.55, 131.18, 128.40, 121.52, 120.24, 110.04, 109.85, 107.90 (2C), 101.44, 70.98, 56.43 (2C), 45.64, 43.61, 42.61, 37.05.

328

ESI-MS: calc'd for C<sub>26</sub>H<sub>23</sub>NO<sub>7</sub>S [M+H]<sup>+</sup>: 494.12, found 494.00 [M+H]<sup>+</sup>.

329

330

6.1.  $^1\text{H}$  NMR spectrum of compound 4'S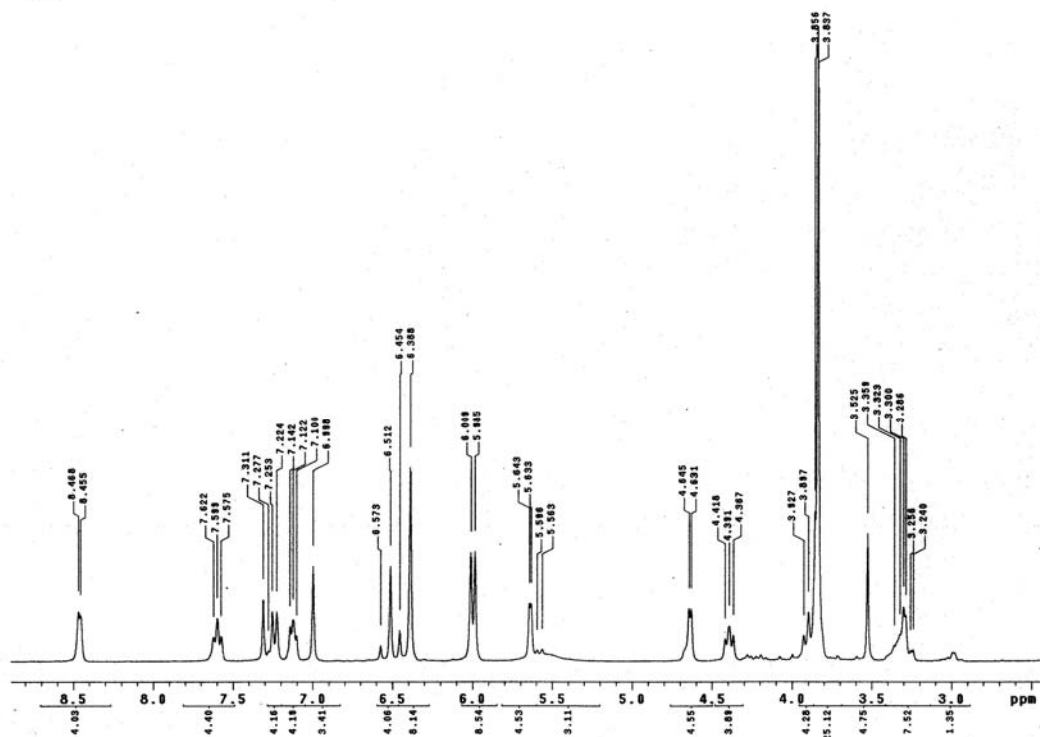

332

333

6.2.  $^{13}\text{C}$  NMR spectrum of compound 4'S.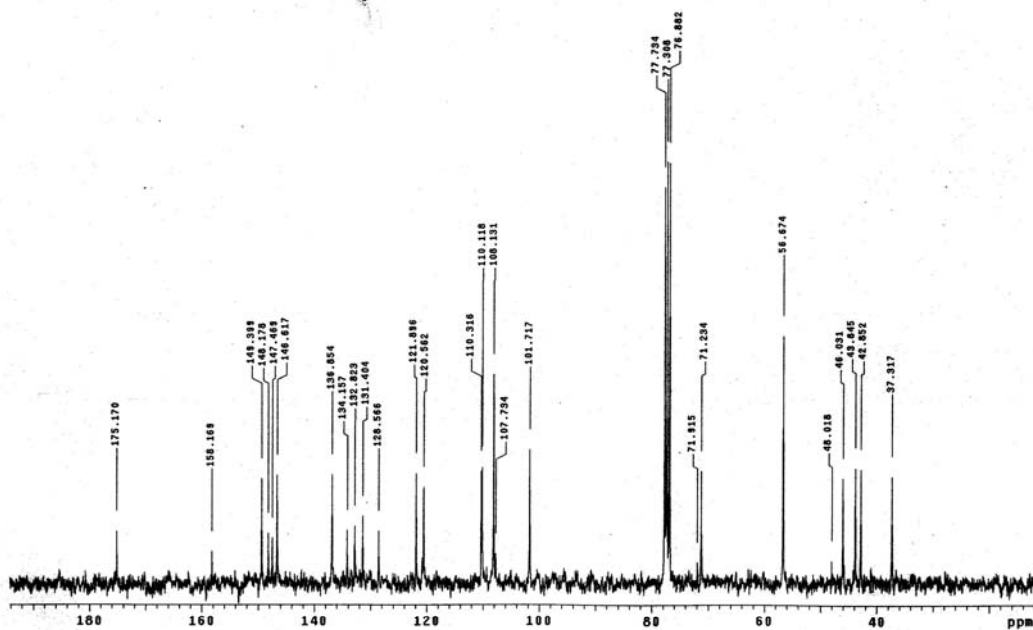

353

354

355

356

### 6.3. $^1\text{H}$ - $^1\text{H}$ COSY spectrums for compound 4'S.

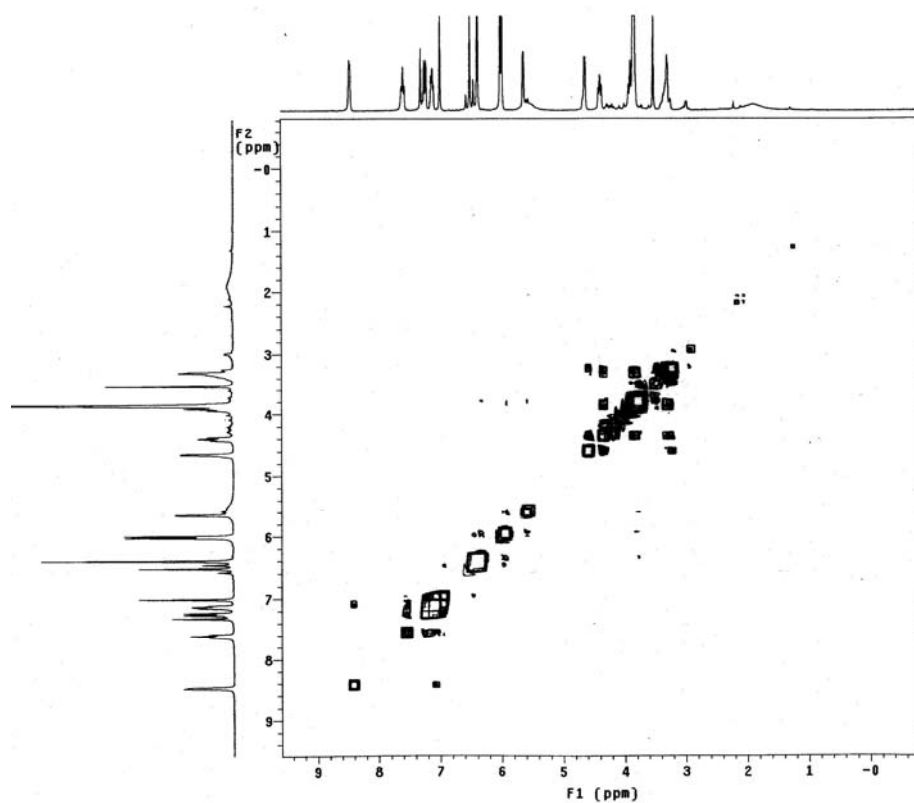

357

358

### 6.4. HMBC spectrums for compound 4'S.

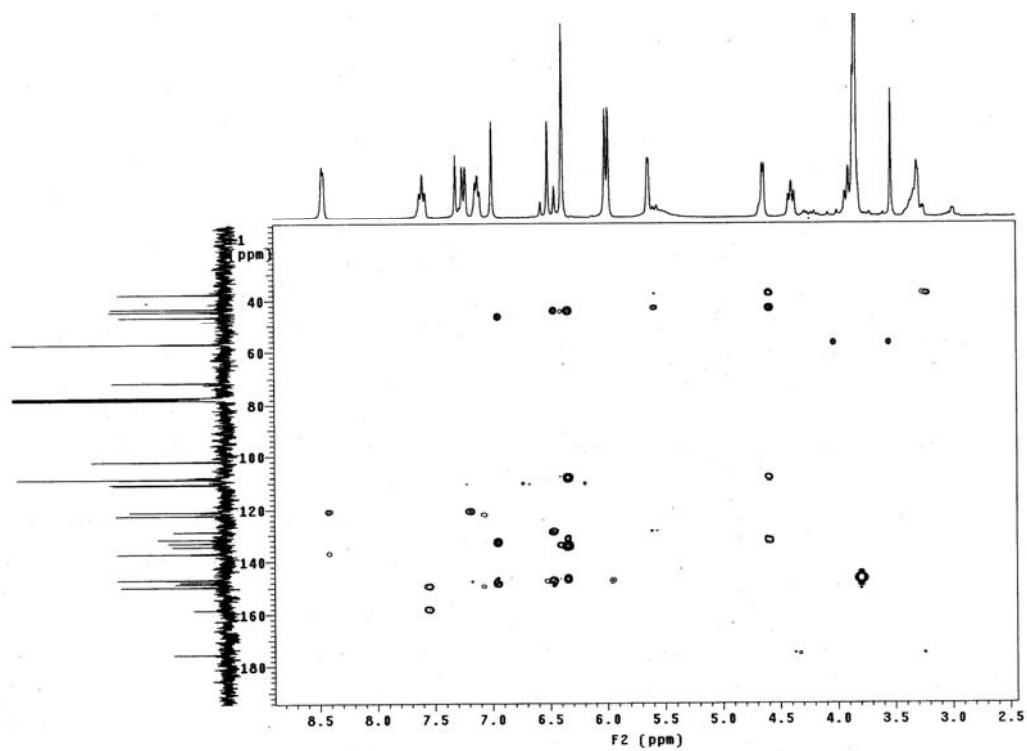

359

360

361

## 6.5. HSQC spectrums for compound 4'S.

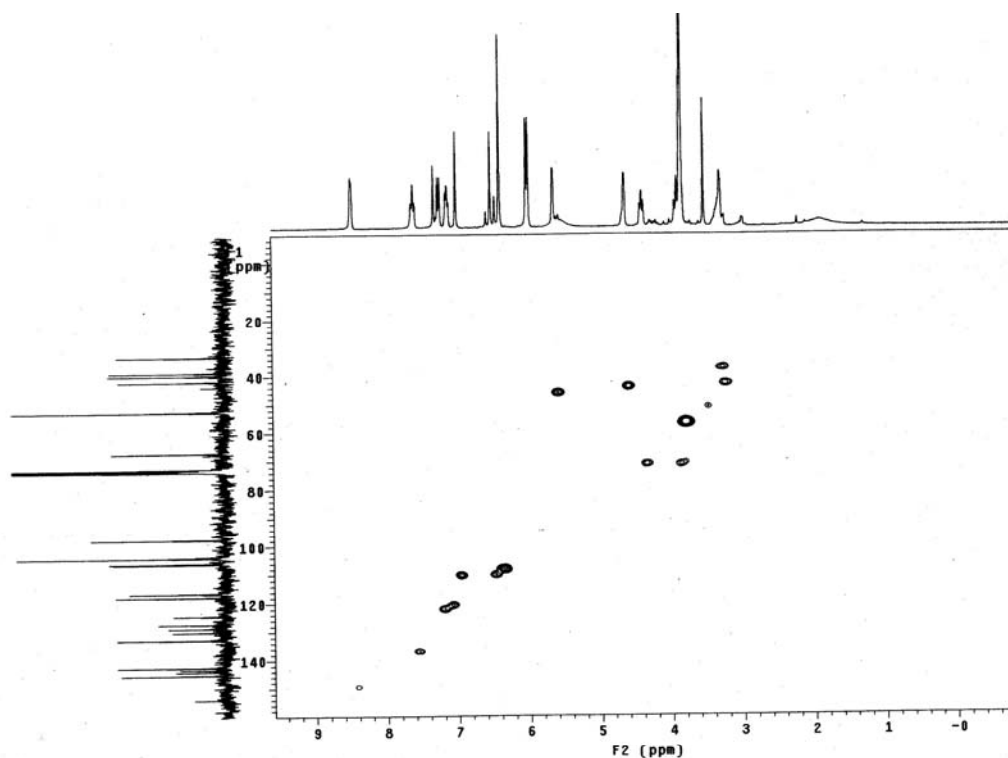

362

363

## 6.6. MS spectrum of compound 4'S.

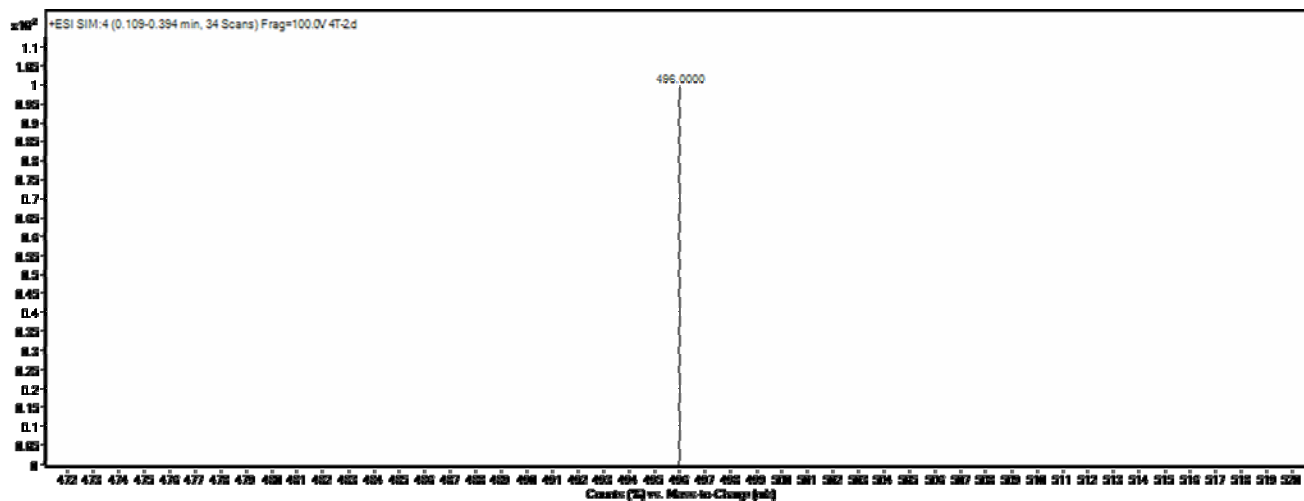

364

365

4 $\beta$ -S-(pyrimidine-2)-4-deoxy-4'-demethyl-podophyllotoxin (4'S)

366

$^1\text{H}$  NMR (300 MHz,  $\text{CDCl}_3$ ,  $\delta$ ): 8.468 (d,  $J = 7.2$  Hz, 1H), 7.599 (t,  $J = 6.9$  Hz, 1H), 7.253 (d,  $J = 7.8$  Hz, 1H),

367

7.122 (t,  $J = 6.0$  Hz, 1H), 6.998 (s, 1H), 6.512 (s, 1H), 6.388 (s, 2H), 6.009 (d,  $J = 7.2$  Hz, 2H), 5.643 (t,  $J = 6.0$

368

Hz, 1H), 4.645 (d,  $J = 4.2$  Hz, 1H), 4.391 (t,  $J = 8.1$  Hz, 1H), 3.897 (t,  $J = 9.0$  Hz, 1H), 3.837 (s, 6H),

369

3.359-3.240 (m, 2H);  $^{13}\text{C}$  NMR (75 MHz,  $\text{CDCl}_3$ ,  $\delta$ ): 175.170, 158.169, 149.399, 148.178, 147.469, 146.617,

370

136.854, 134.157, 132.823, 131.404, 128.566, 121.896, 120.562, 110.316, 110.118, 108.131 (2C), 101.717,

371

71.234, 56.674 (2C), 46.031, 43.845, 42.852, 37.317.

372

ESI-MS: calc'd for  $\text{C}_{25}\text{H}_{22}\text{N}_2\text{O}_7\text{S}$   $[\text{M}+\text{H}]^+$ : 496.11, found 496.00  $[\text{M}+\text{H}]^+$ .

373

374

375

376

### 7.1. $^1\text{H}$ NMR spectrum of compound 5'S.

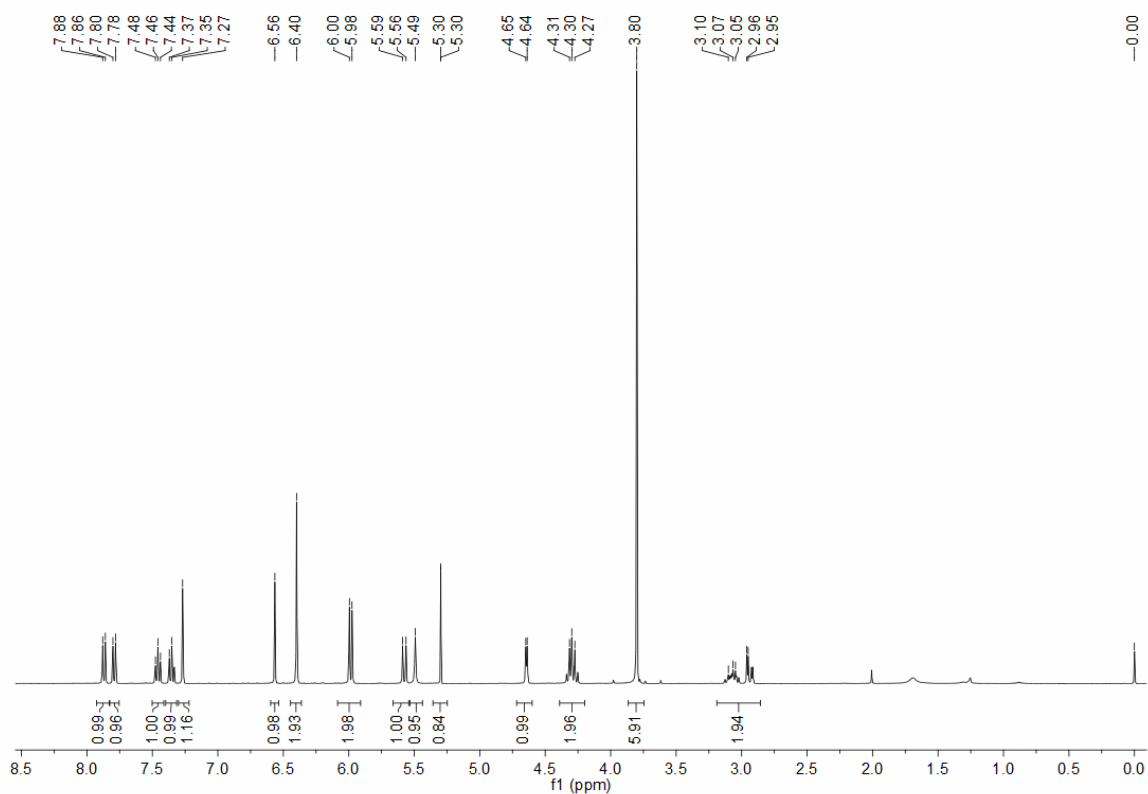

377

378

379

### 7.2. $^{13}\text{C}$ NMR spectrum of compound 5'S.

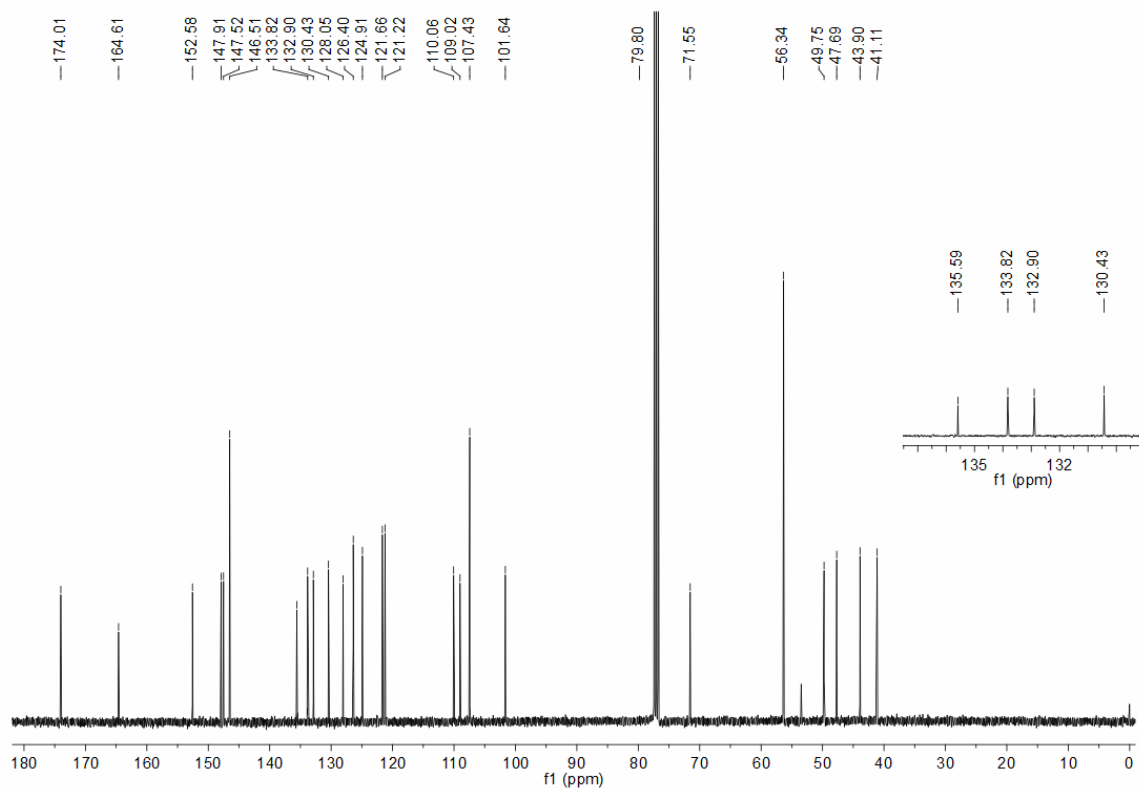

380

381

382

383

384

385

7.3.  $^1\text{H}$ - $^1\text{H}$  COSY spectrums for compound 5'S.

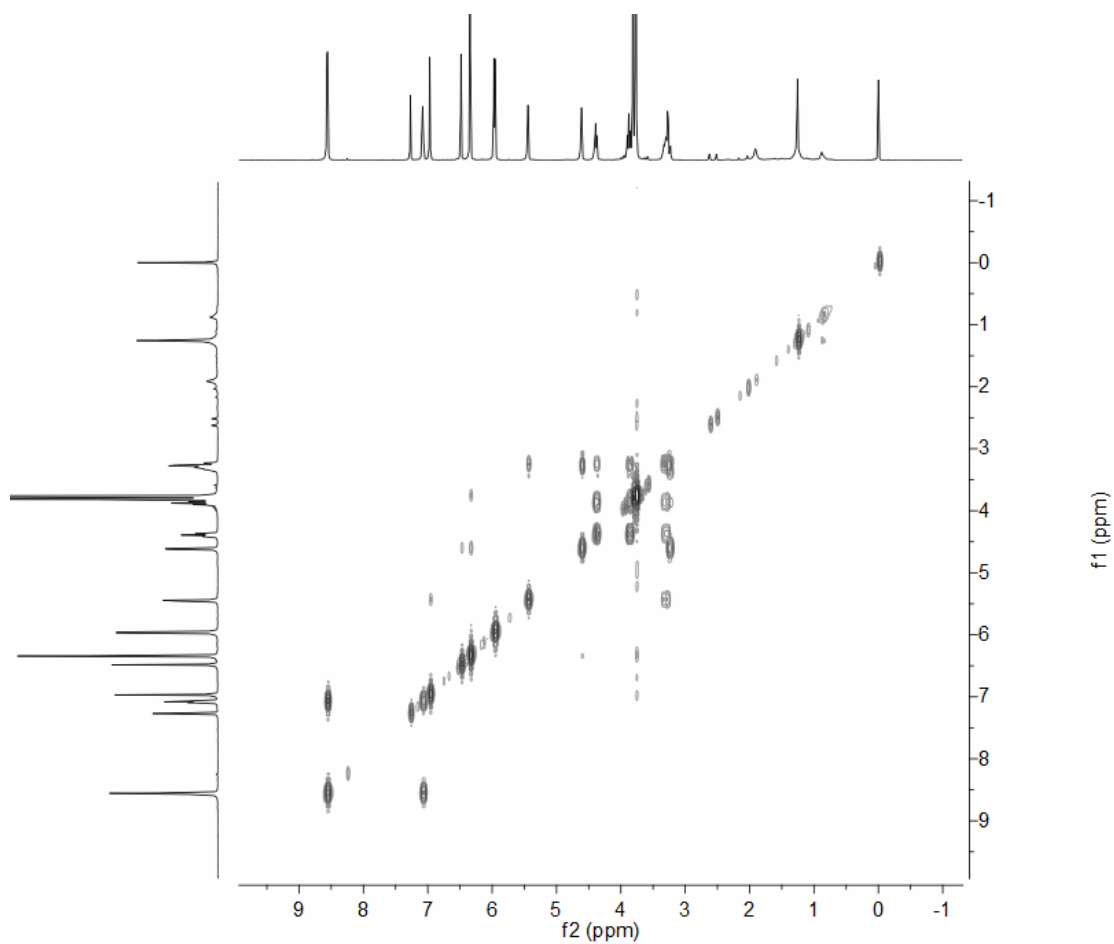

386

387

7.4. HMBC spectrums for compound 5'S.

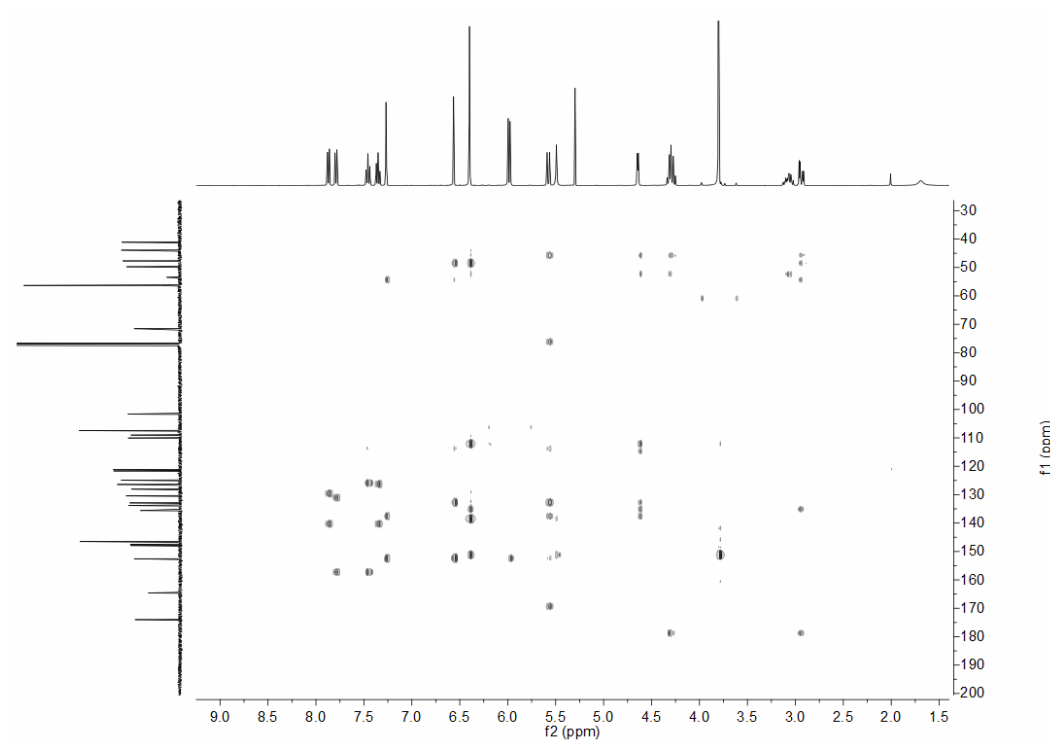

388

389

## 7.5. HSQC spectrums for compound 5'S.

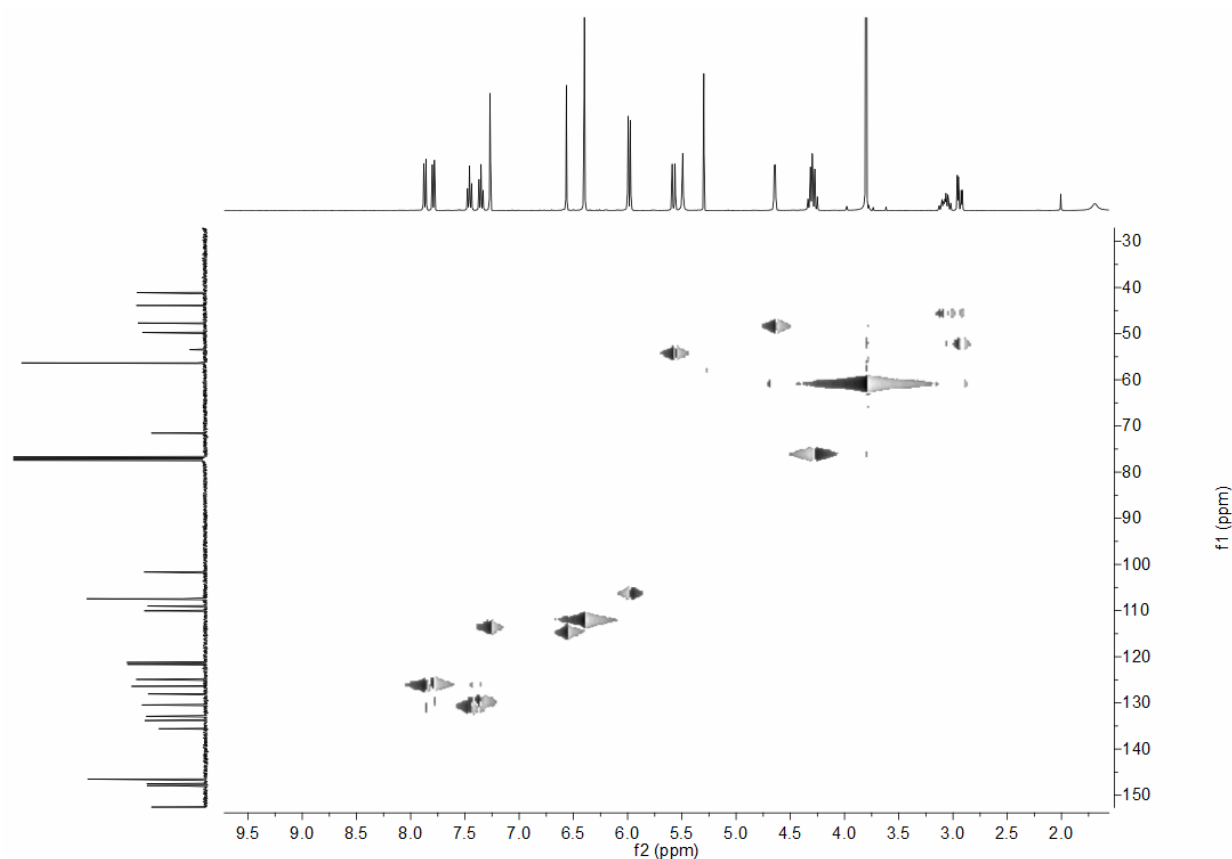

390

391

392

## 7.6. MS spectrum of compound 5'S.

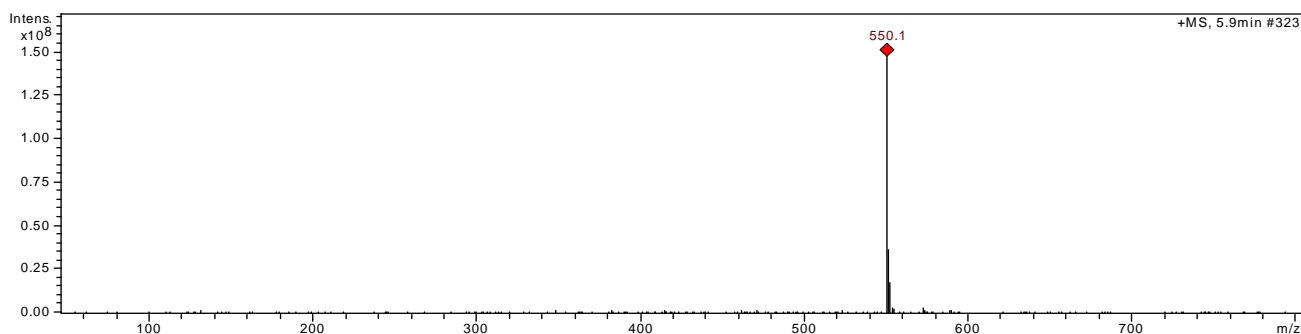

393

394

395 4 $\beta$ -S-(benzothiazole-2)-4-deoxy-4'-demethyl-podophyllotoxin (5'S)

396  $^1\text{H}$  NMR (400 MHz,  $\text{CDCl}_3$ ,  $\delta$ ): 7.88 (d,  $J = 8.0$  Hz, 1H), 7.80 (d,  $J = 8.0$  Hz, 1H), 7.46 (t,  $J = 8.0$  Hz, 1H), 7.35  
 397 (t,  $J = 8.0$  Hz, 1H), 7.27 (s, 1H), 6.56 (s, 1H), 6.40 (s, 2H), 6.00 (d,  $J = 8.0$  Hz, 2H), 5.59 (d,  $J = 4.0$  Hz, 1H),  
 398 4.65 (d,  $J = 4.0$  Hz, 1H), 4.34-4.25 (m, 2H), 3.80 (s, 6H), 3.13-3.02 (m, 1H), 2.96-2.91 (m, 1H);  $^{13}\text{C}$  NMR(101  
 399 MHz,  $\text{CDCl}_3$ ,  $\delta$ ): 174.01, 164.61, 152.58, 147.91, 147.52, 146.51 (2C), 135.59, 133.82, 132.90, 130.43, 128.05,  
 400 126.40, 124.91, 121.66, 121.22, 110.06, 109.02, 107.43 (2C), 101.64, 71.55, 56.34 (2C), 49.75, 47.69, 43.90,  
 401 41.11.

402 ESI-MS: calc'd for  $\text{C}_{28}\text{H}_{23}\text{NO}_7\text{S}_2$   $[\text{M}+\text{H}]^+$ : 550.09, found 550.1  $[\text{M}+\text{H}]^+$ .

403

404

405

406

8.1.  $^1\text{H}$  NMR spectrum of compound 6'S.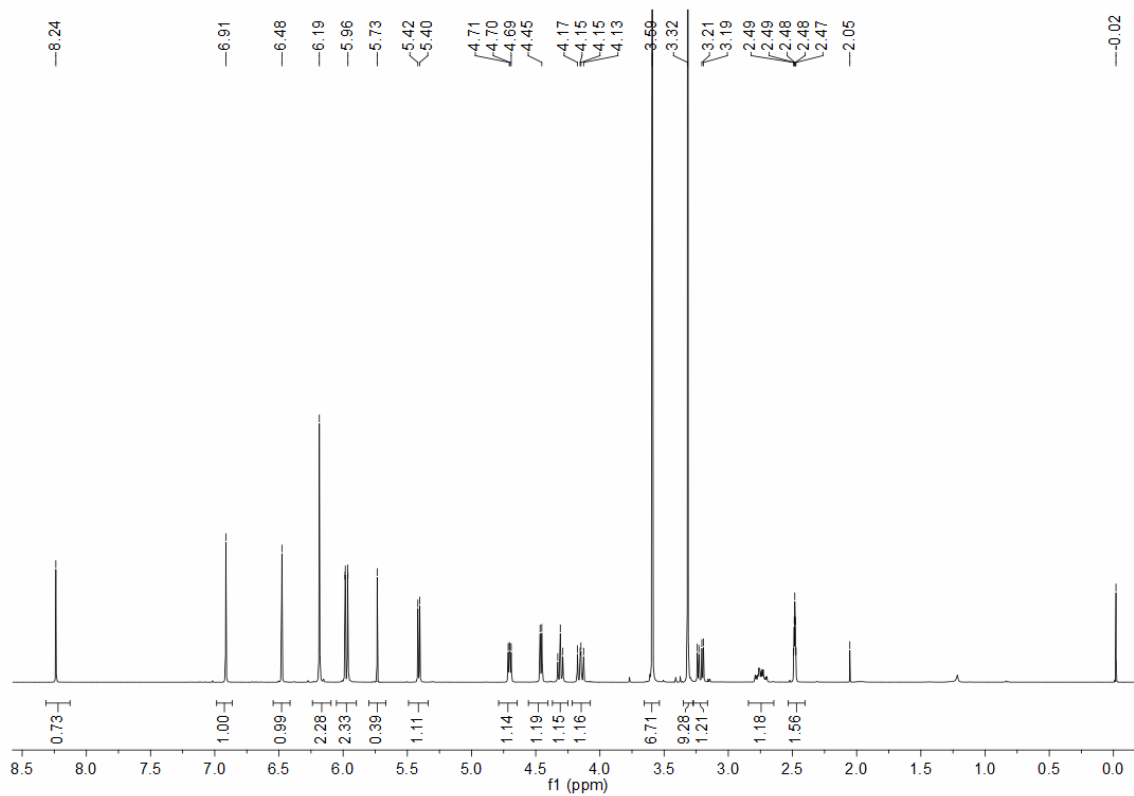

407

408

8.2.  $^{13}\text{C}$  NMR spectrum of compound 6'S.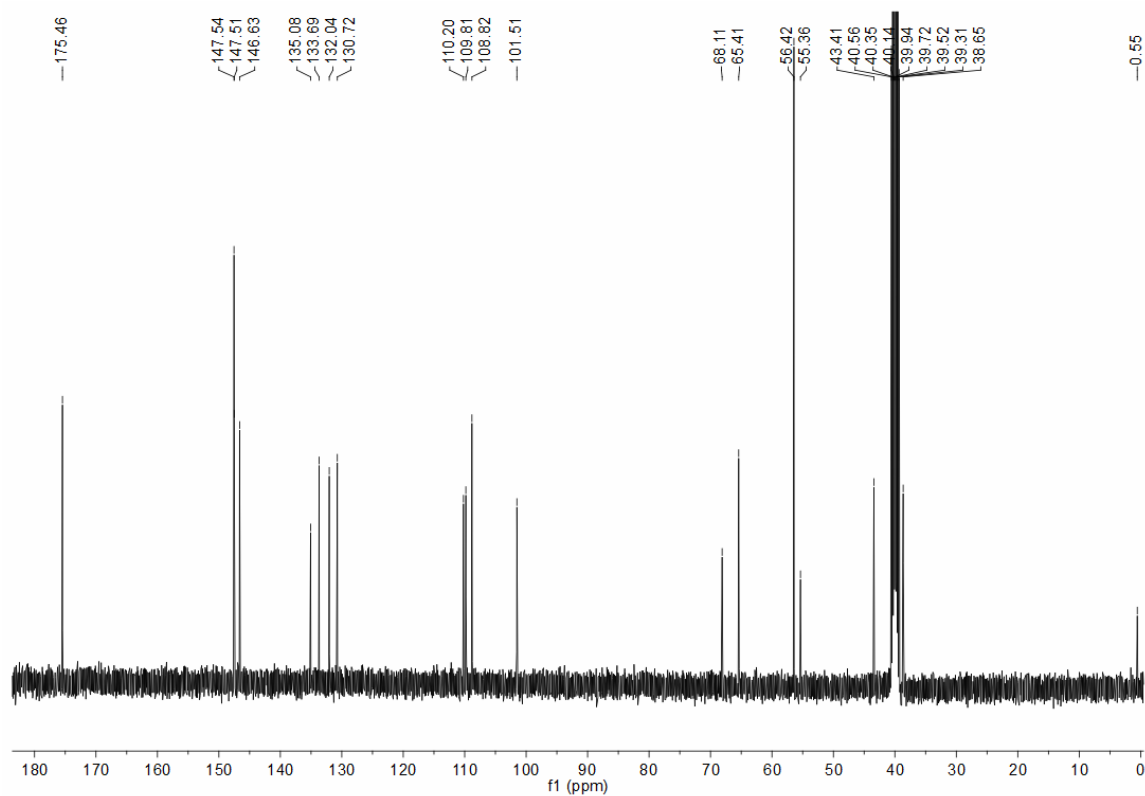

409

410

411

412

413



414

### 8.3. $^1\text{H}$ - $^1\text{H}$ COSY spectra for compound 6'S.

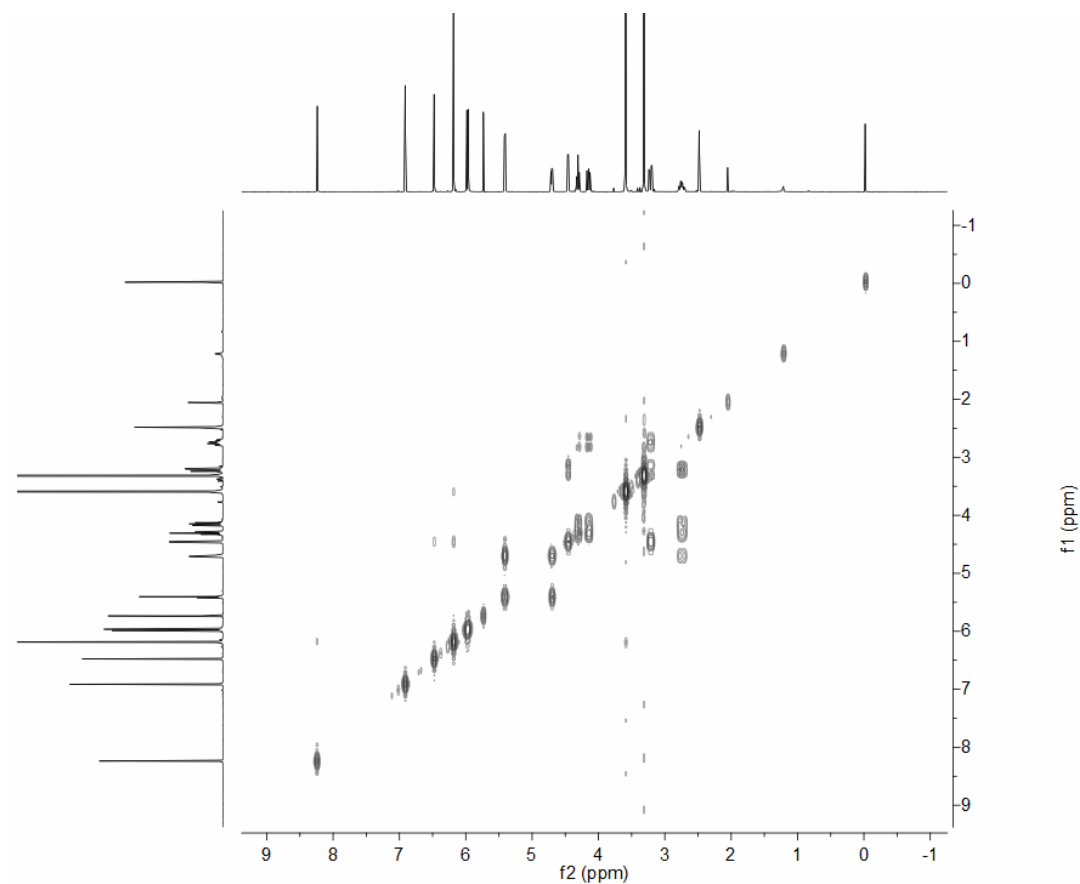

415

416

### 8.4. HMBC spectra for compound 6'S.

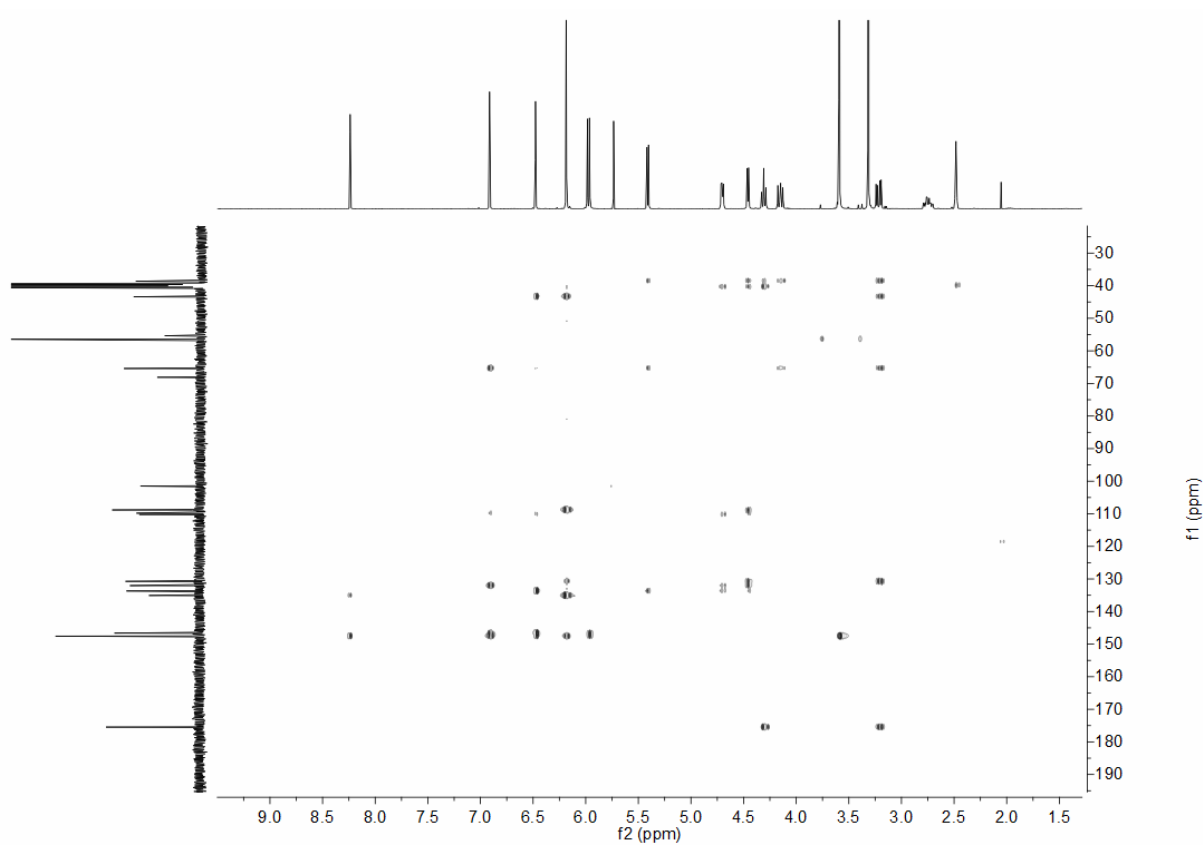

417

418

## 8.5. HSQC spectrums for compound 6'S.

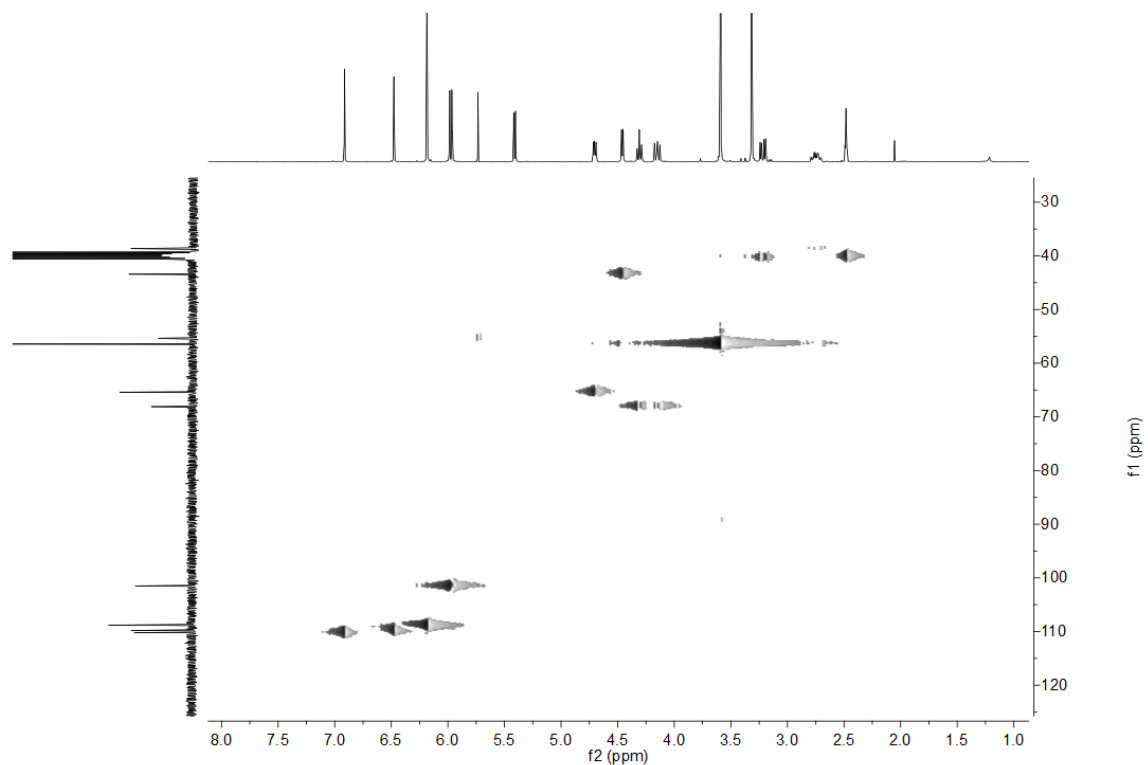

419

420

## 8.6. MS spectrum of compound 6'S.

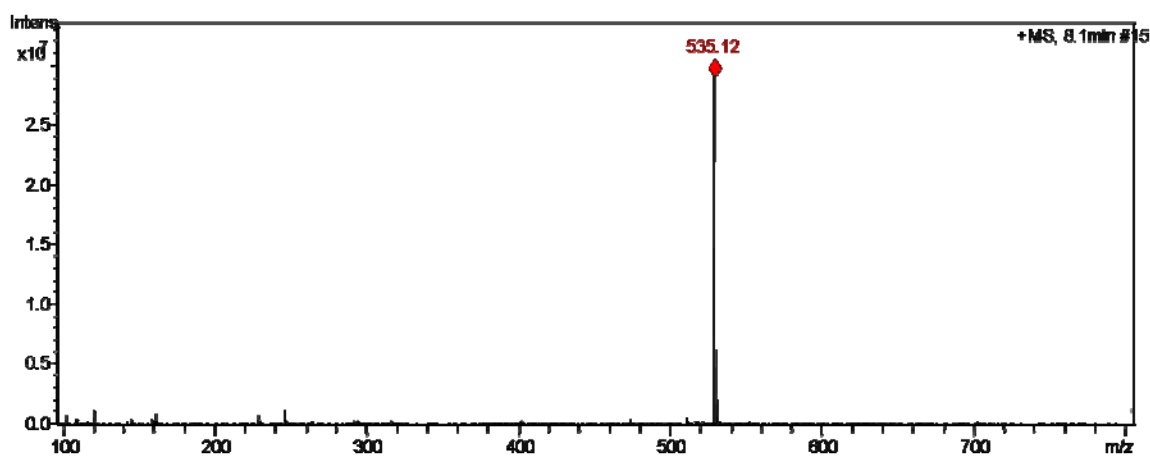

421

422

423 4 $\beta$ -S-(purine-6)-4-deoxy-4'-demethyl-podophyllotoxin (6'S)

424  $^1\text{H}$  NMR (400 MHz, DMSO):  $\delta$  8.24 (s, 1H), 6.91 (s, 1H), 6.48 (s, 1H), 6.19 (s, 2H), 5.98 (d,  $J = 8.0$  Hz, 2H),  
 425 5.42 (d,  $J = 8.0$  Hz, 1H), 4.71 (dd,  $J = 4.0$  Hz, 1H), 4.47 (d,  $J = 8.0$  Hz, 1H), 4.31 (t,  $J = 8.0$  Hz, 1H), 4.15 (t,  $J$   
 426 = 8.0 Hz, 1H), 3.59 (s, 6H), 3.24-3.19 (m, 1H), 2.79 - 2.70 (m, 1H);  $^{13}\text{C}$  NMR (101 MHz, DMSO):  $\delta$  175.46  
 427 (2C), 147.54, 147.51 (2C), 146.63 (2C), 135.08, 133.69 (2C), 132.04, 130.72 (2C), 110.20, 109.81, 108.82 (2C),  
 428 101.51, 68.11, 65.41, 56.42 (2C), 55.36, 43.41, 38.65.

429 ESI-MS: calc'd for  $\text{C}_{27}\text{H}_{25}\text{NO}_7\text{S}$   $[\text{M}+\text{H}]^+$ : 534.12, found 535.12  $[\text{M}+\text{H}]^+$ .

430

431

432

433

434

9.1.  $^1\text{H}$  NMR spectrum of compound 1N.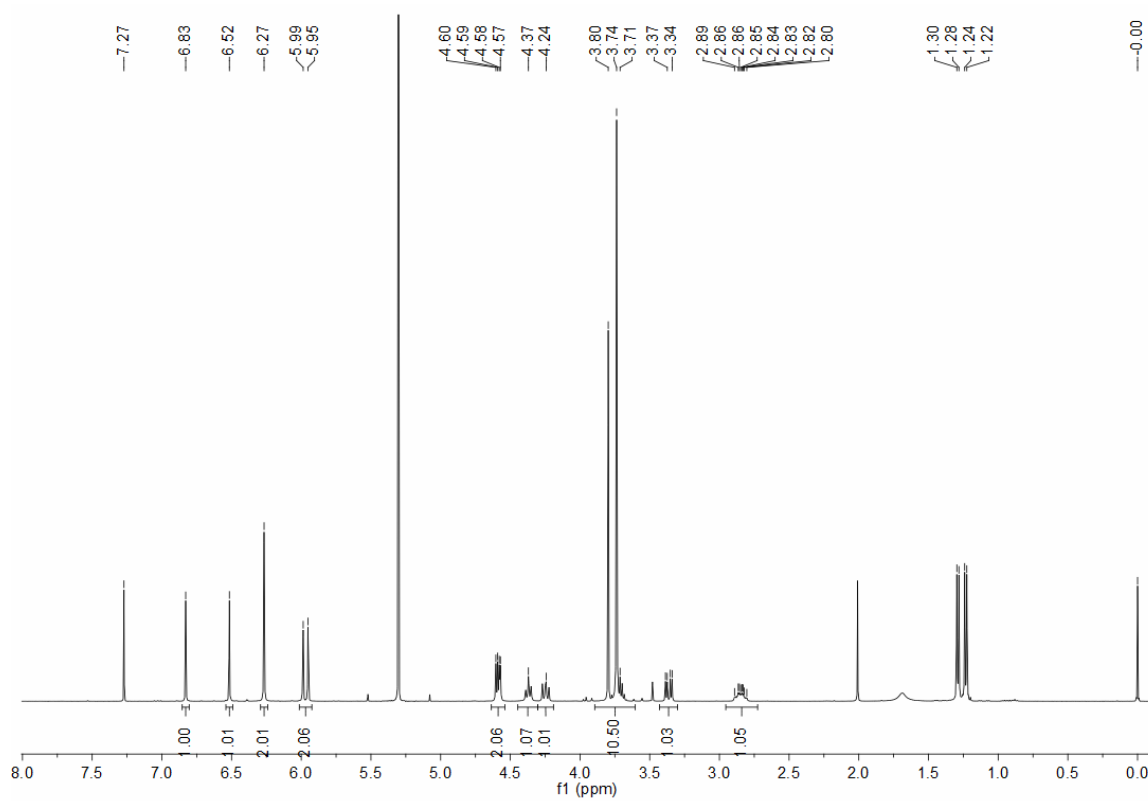

435

436

9.2.  $^{13}\text{C}$  NMR spectrum of compound 1N.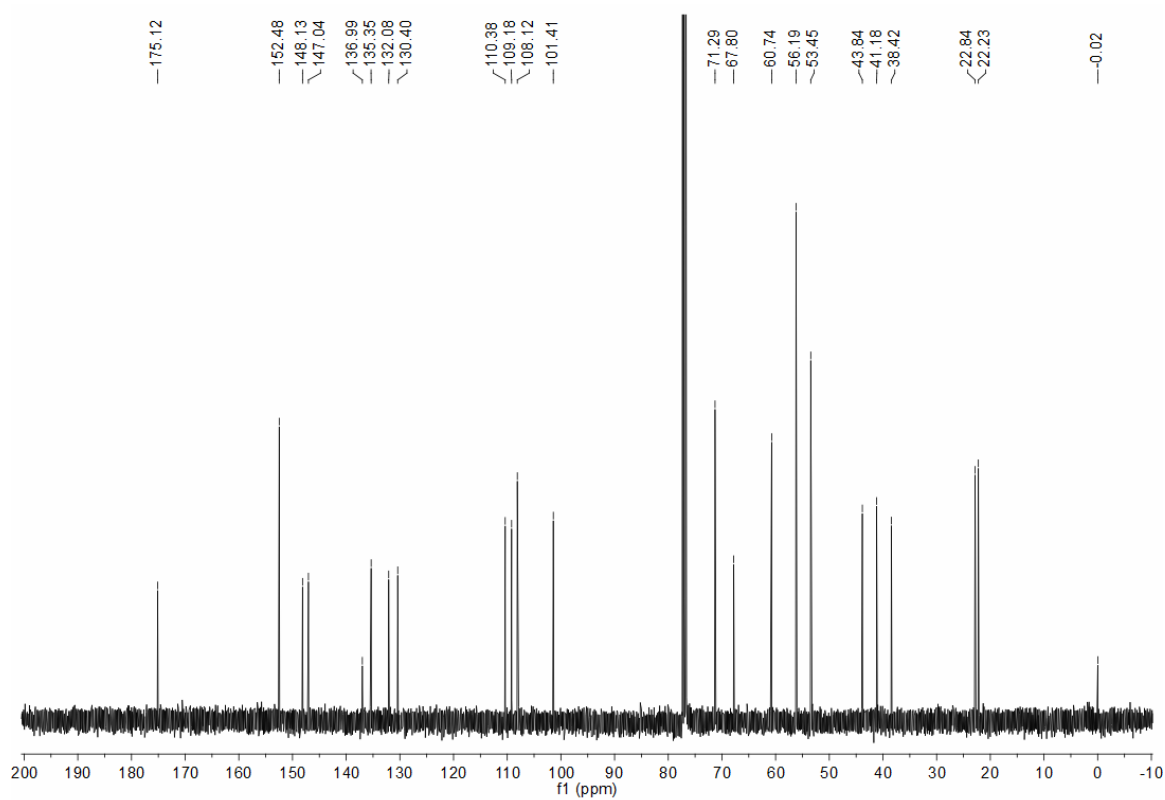

437

438

439

440

441

442

### 9.3. $^1\text{H}$ - $^1\text{H}$ COSY spectrums for compound 1N.

443

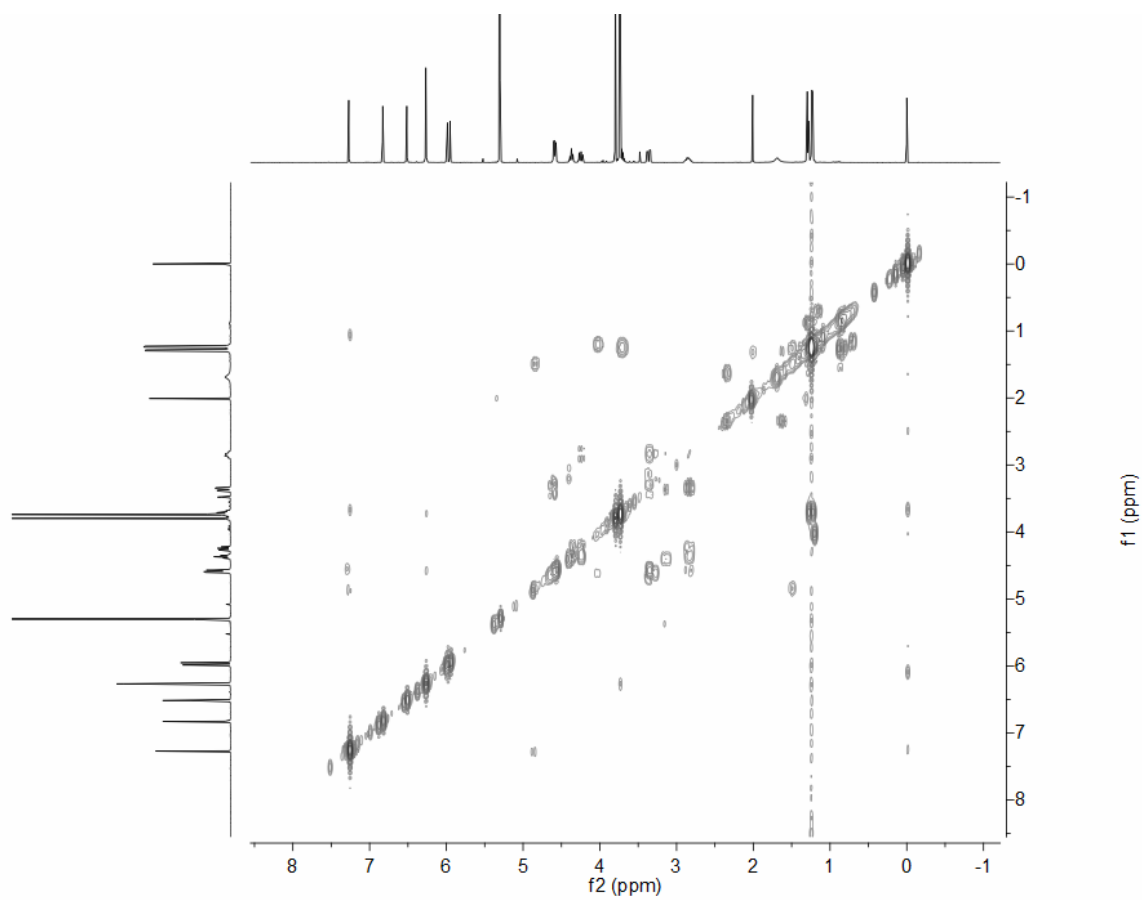

444

445

### 9.4. HMBC spectrums for compound 1N.

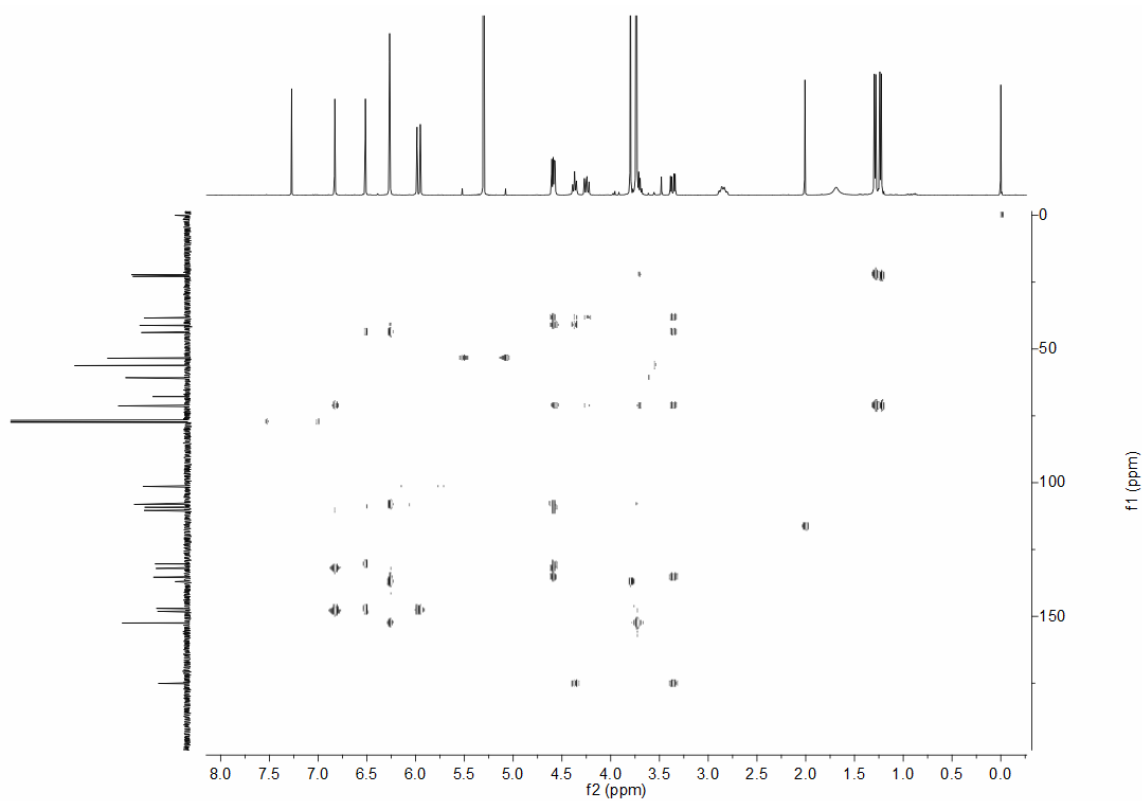

446

447

## 9.5. HSQC spectrums for compound 1N.

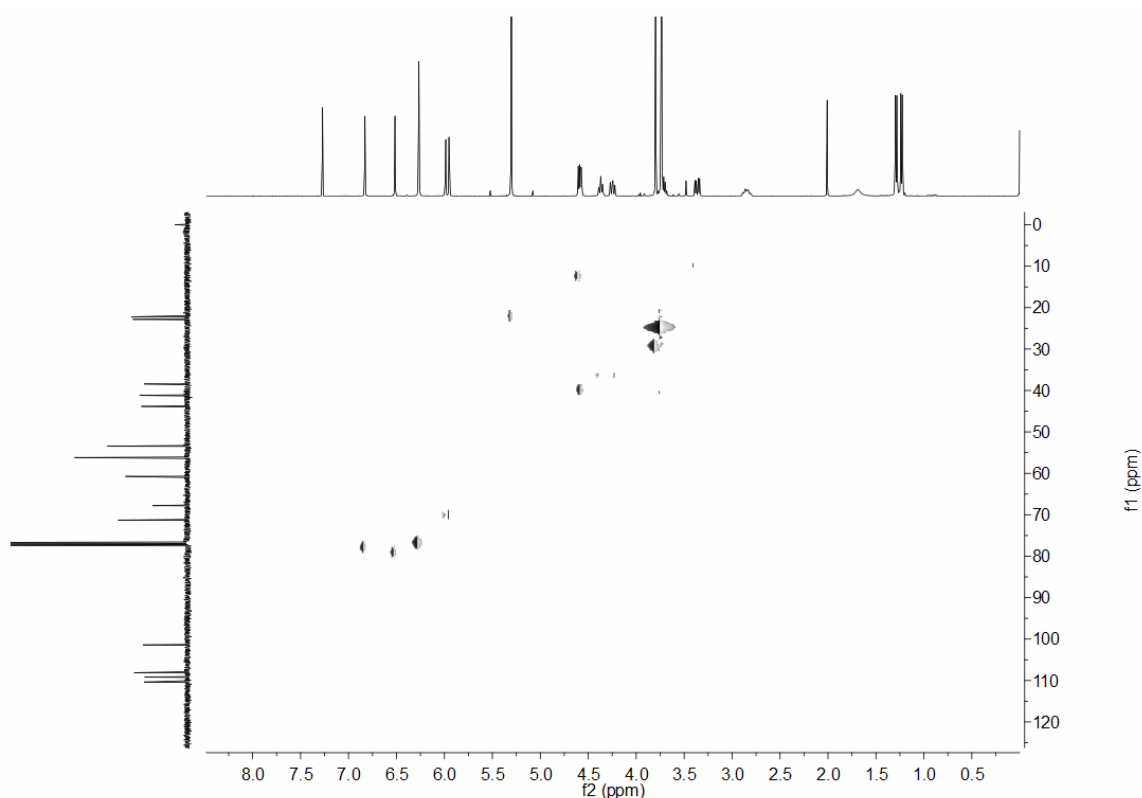

448

449

## 9.6. MS spectrum of compound 1N.

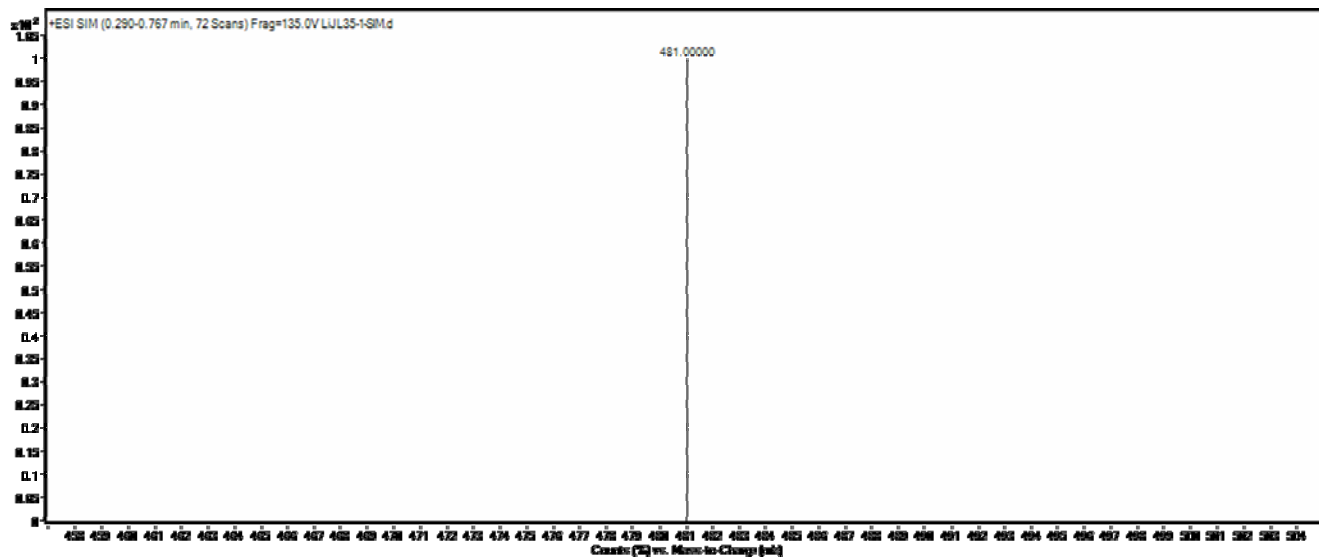

450

451

452 4 $\beta$ -N-(1,2,4-triazole-3)-4-deoxy-podophyllotoxin (1N).

453  $^1\text{H}$  NMR (400 MHz,  $\text{CDCl}_3$ ):  $\delta$  6.83 (s, 1H), 6.52 (s, 1H), 6.27 (s, 2H), 5.99 (d,  $J = 16$  Hz, 2H), 4.60 (dd,  $J =$   
 454 4.0 Hz, 2H), 4.37 (t,  $J = 4.0$  Hz, 1H), 4.24 (t,  $J = 4.0$  Hz, 1H), 3.80 (s, 3H), 3.74 (s, 6H), 3.71 (t,  $J = 4.0$  Hz, 1H),  
 455 3.39-3.34 (dd,  $J = 8.0$  Hz, 1H), 2.89-2.80 (m, 1H);  $^{13}\text{C}$  NMR (101 MHz,  $\text{CDCl}_3$ ):  $\delta$  174.842, 158.605, 152.729  
 456 (3C), 148.617, 147.685, 137.263, 135.708, 132.541, 127.554, 110.428, 110.099, 108.460 (2C), 101.882, 70.754,  
 457 61.025, 56.465 (2C), 49.103, 43.899, 42.421, 37.489;

458 ESI-MS: calc'd for  $\text{C}_{24}\text{H}_{24}\text{N}_4\text{O}_7$   $[\text{M}+\text{H}]^+$ : 481.16, found 481.00  $[\text{M}+\text{H}]^+$ .

459

460

461

10.1. <sup>1</sup>H NMR spectrum of compound 2N.

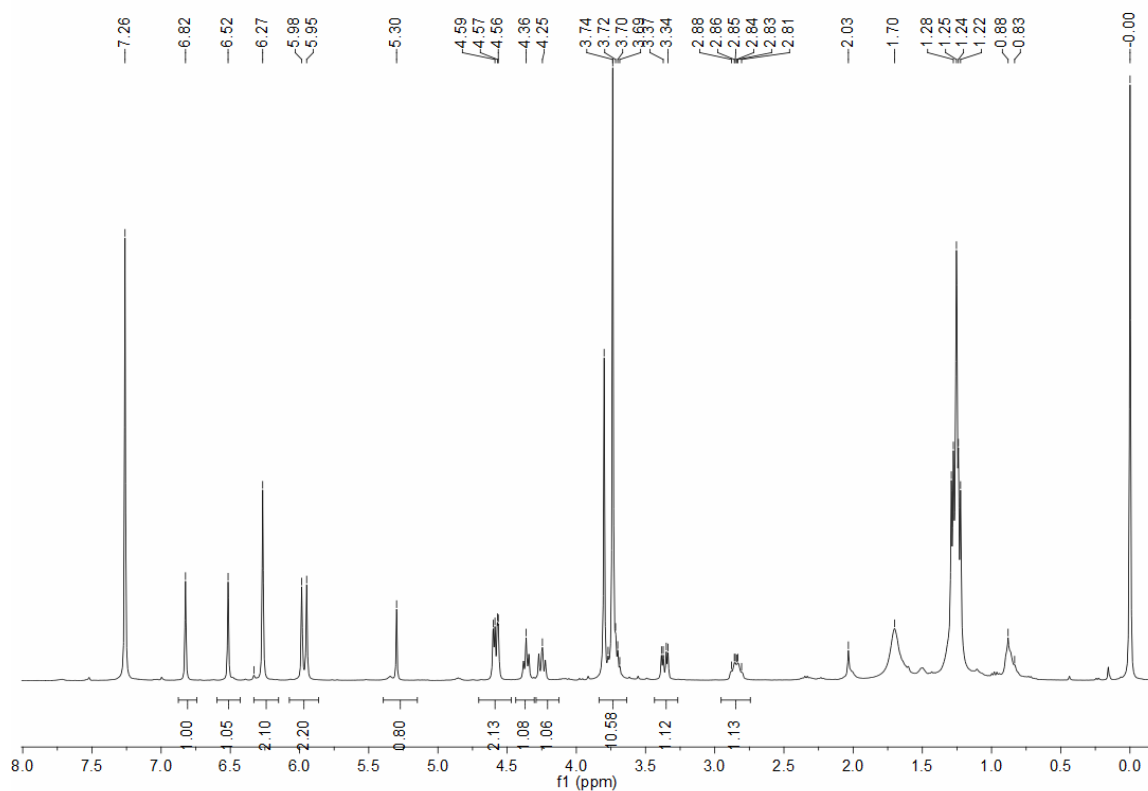

462

463

10.2. <sup>13</sup>C NMR spectrum of compound 2N.

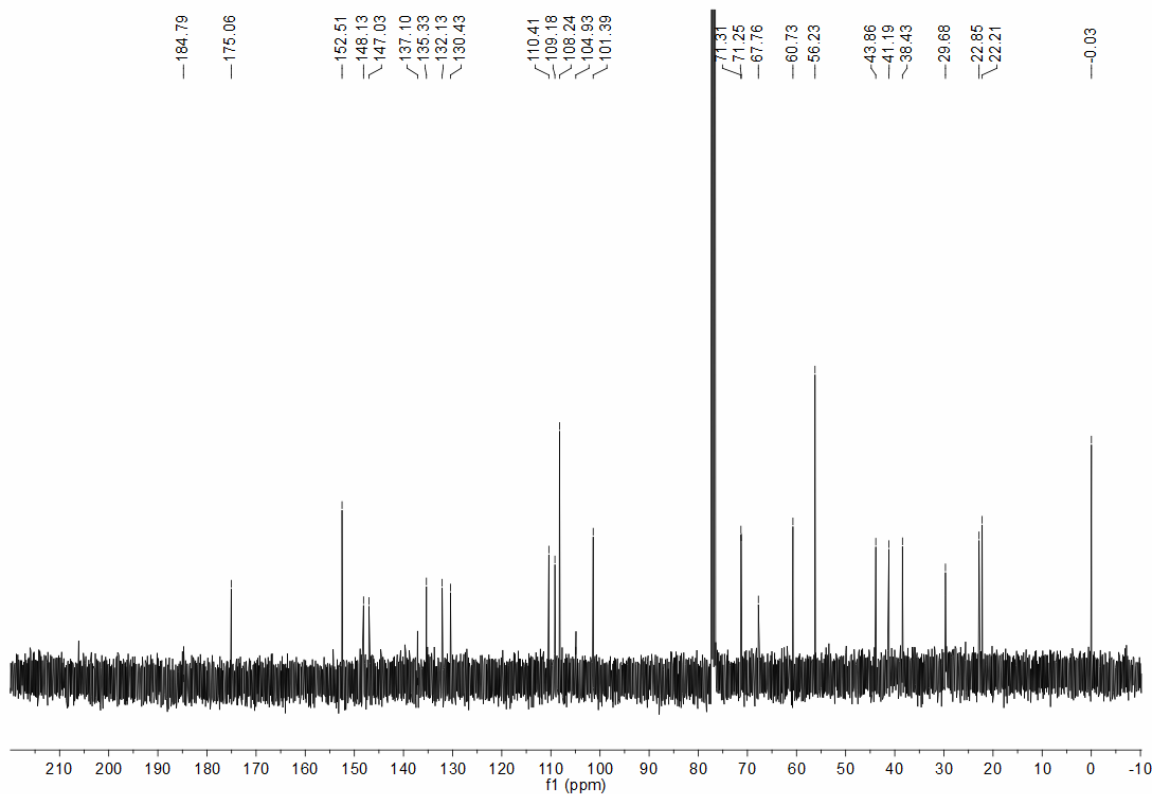

464

465

466

467

468

469

### 10.3. $^1\text{H}$ - $^1\text{H}$ COSY spectrums for compound 2N.

470

471

472

473

474

475

476

477

478

479

480

481

482

483

484

485

486

487

488

489

490

491

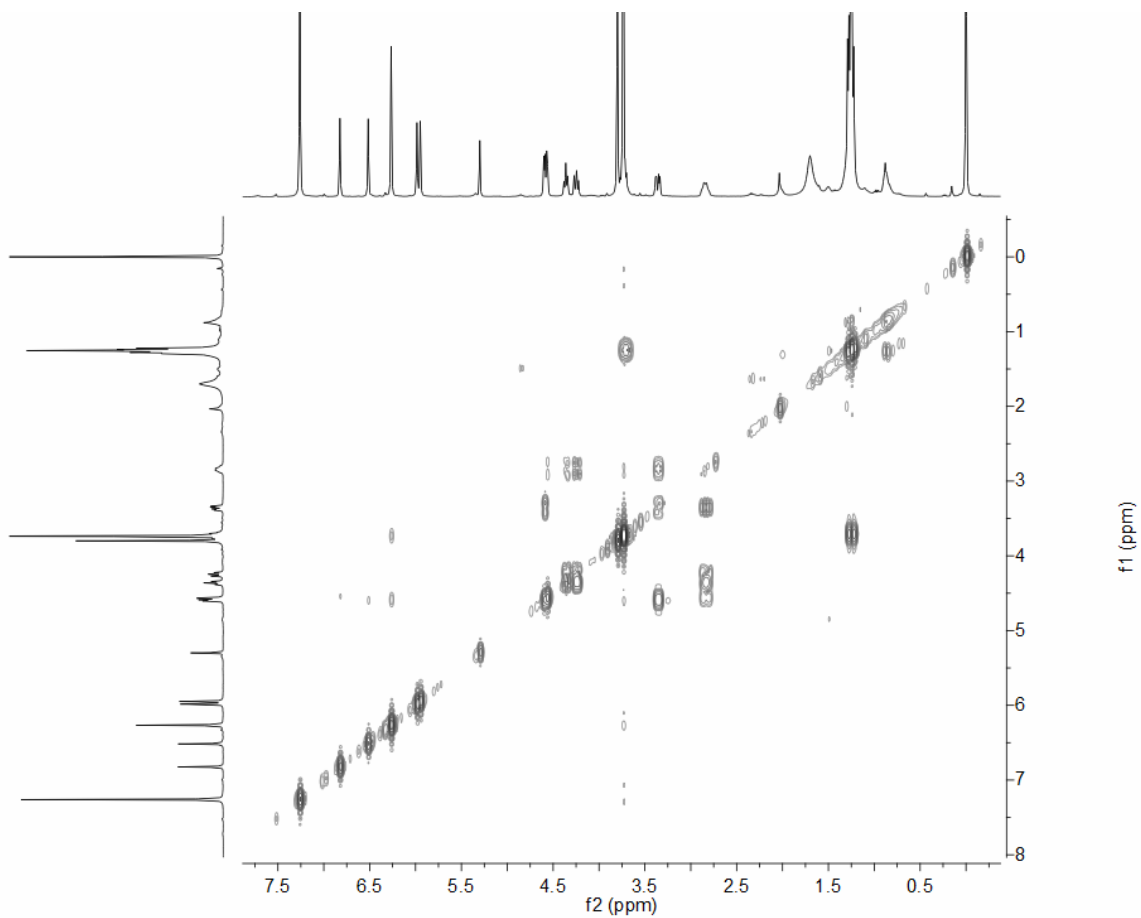

492

### 10.4. HMBC spectrums for compound 2N.

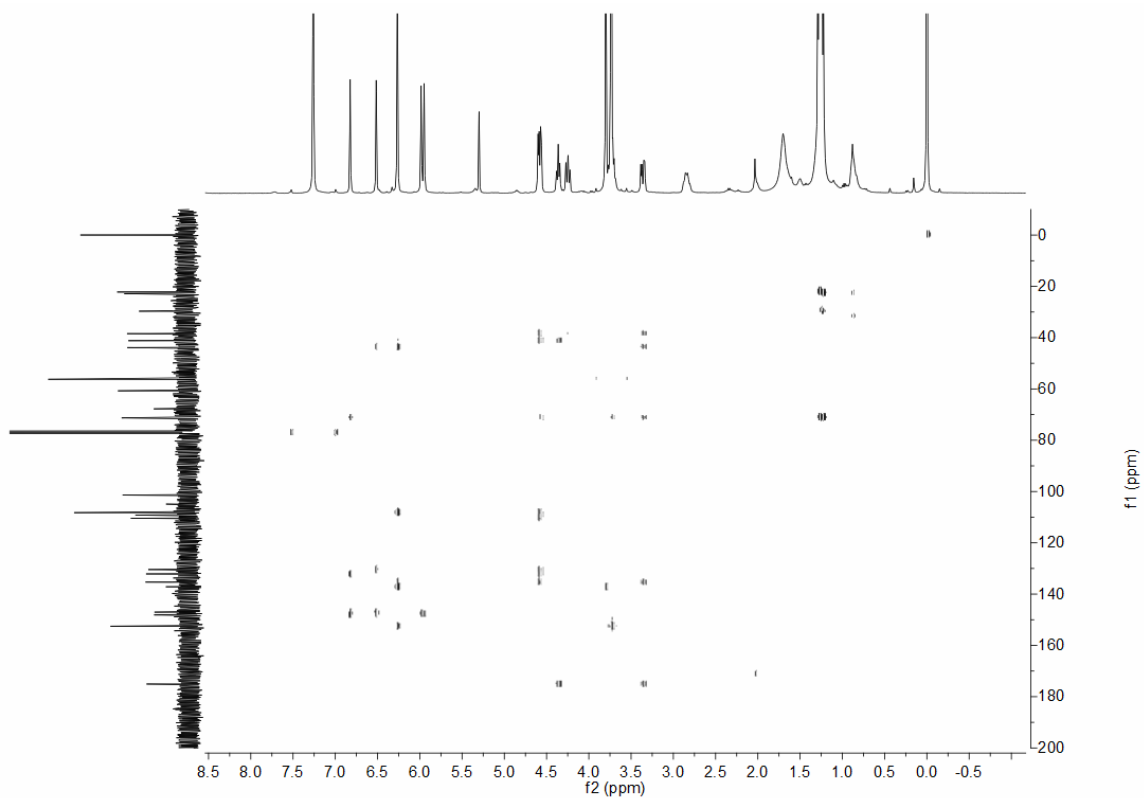

493

494

495

## 10.5. HSQC spectrums for compound 2N

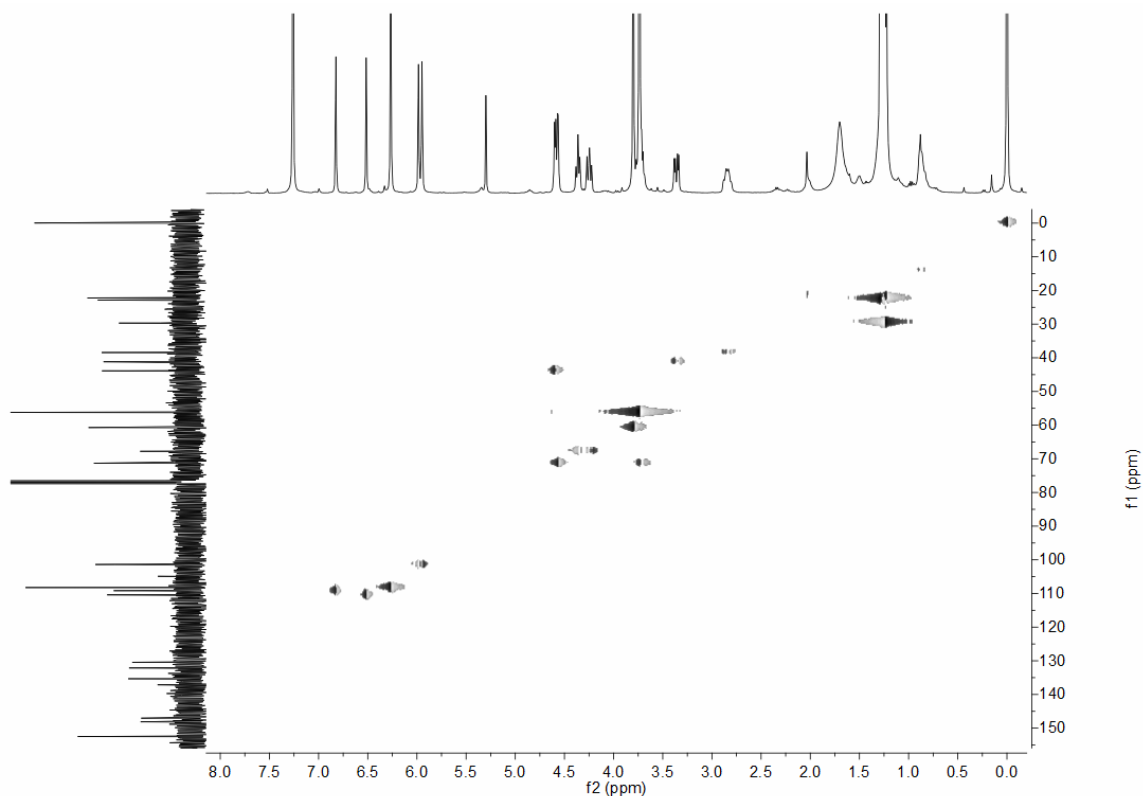

496

497

498

## 10.6. MS spectrum of compound 2N

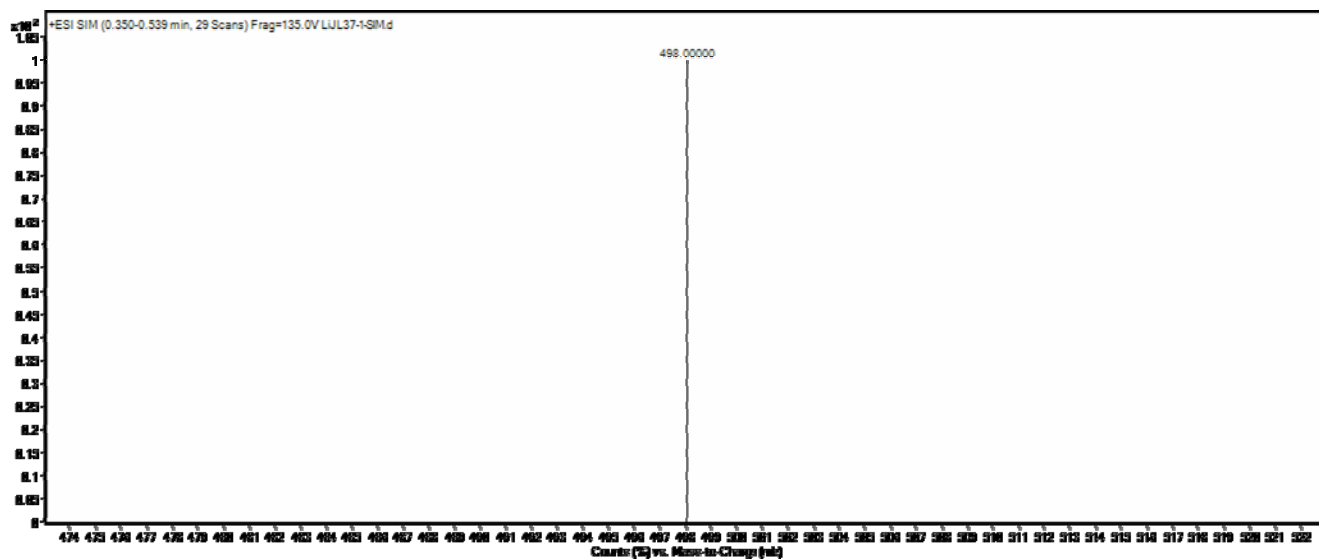

499

500

4 $\beta$ -N-(1,3,4-thiodiazole-2)-4-deoxy-podophyllotoxin (2N).

501

$^1\text{H}$  NMR (400 MHz,  $\text{CDCl}_3$ ):  $\delta$  6.82 (s, 1H), 6.52 (s, 1H), 6.27 (s, 2H), 5.98 (d,  $J = 3.6$  Hz, 2H), 5.30 (s, 1H), 5.46 (dd, 2H,  $J = 4.0$  Hz), 4.36 (t, 1H,  $J = 8.0$  Hz), 4.24 (t, 1H,  $J = 8.0$  Hz), 3.80 (s, 3H), 3.74 (s, 6H), 3.72 (t,  $J = 8.0$  Hz, 1H), 3.38 (m,  $J = 4.0$  Hz, 1H), 2.88-2.81 (m, 1H);  $^{13}\text{C}$  NMR(101 MHz,  $\text{CDCl}_3$ ):  $\delta$  175.06, 152.51 (2C), 148.13, 147.03, 137.14, 135.33, 132.13, 130.43, 110.41, 109.18, 108.24 (2C), 104.89, 101.39, 71.31, 71.25, 67.76, 60.73, 56.23 (2C), 43.86, 41.19, 38.43;

502

503

504

505

ESI-MS: calc'd for  $\text{C}_{24}\text{H}_{23}\text{N}_3\text{O}_7\text{S}$ : 498.52, found 498.00  $[\text{M}+\text{H}]^+$ .

506

507



11.1.  $^1\text{H}$  NMR spectrum of compound 3N.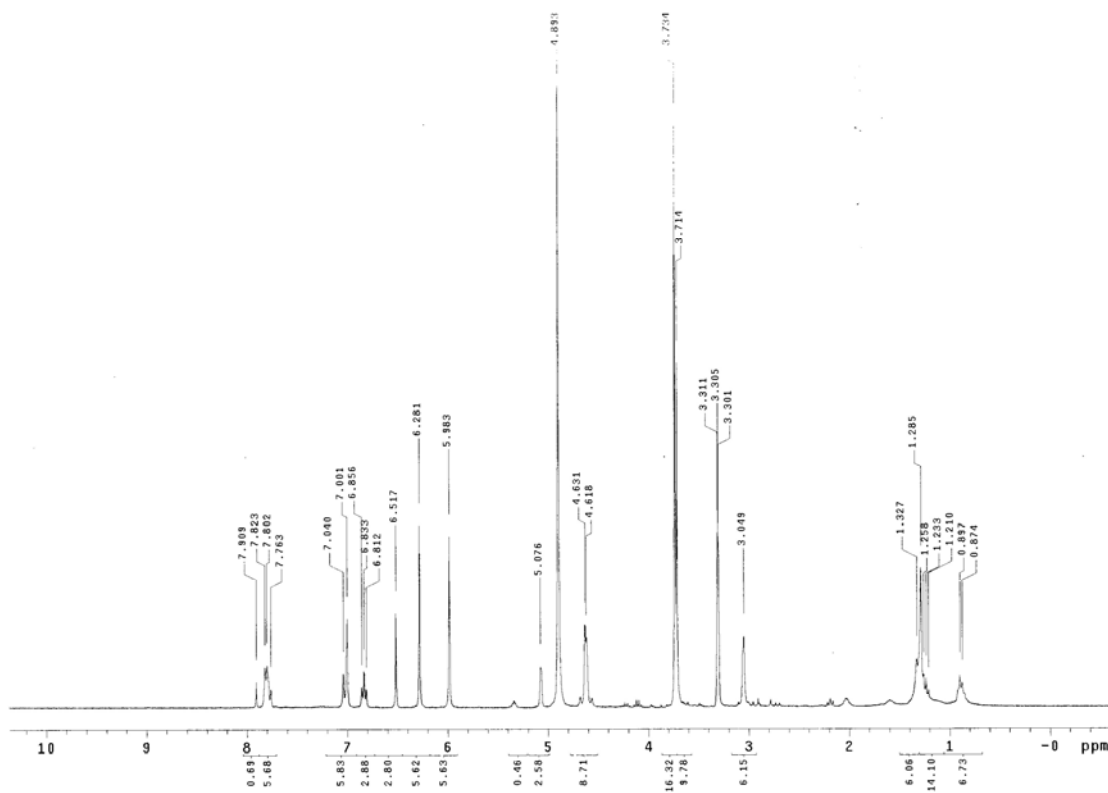

509

510

511

11.2.  $^{13}\text{C}$  NMR spectrum of compound 3N.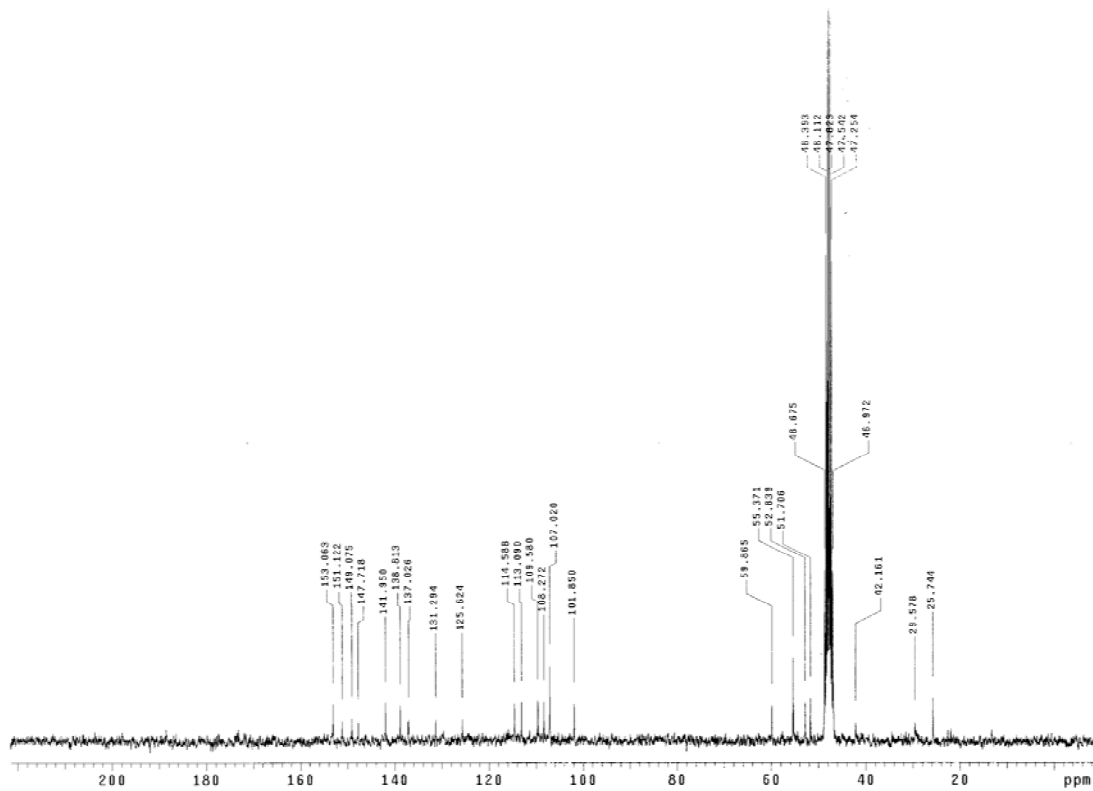

512

513

514

515

### 11.3. $^1\text{H}$ - $^1\text{H}$ COSY diagram of compound 3N

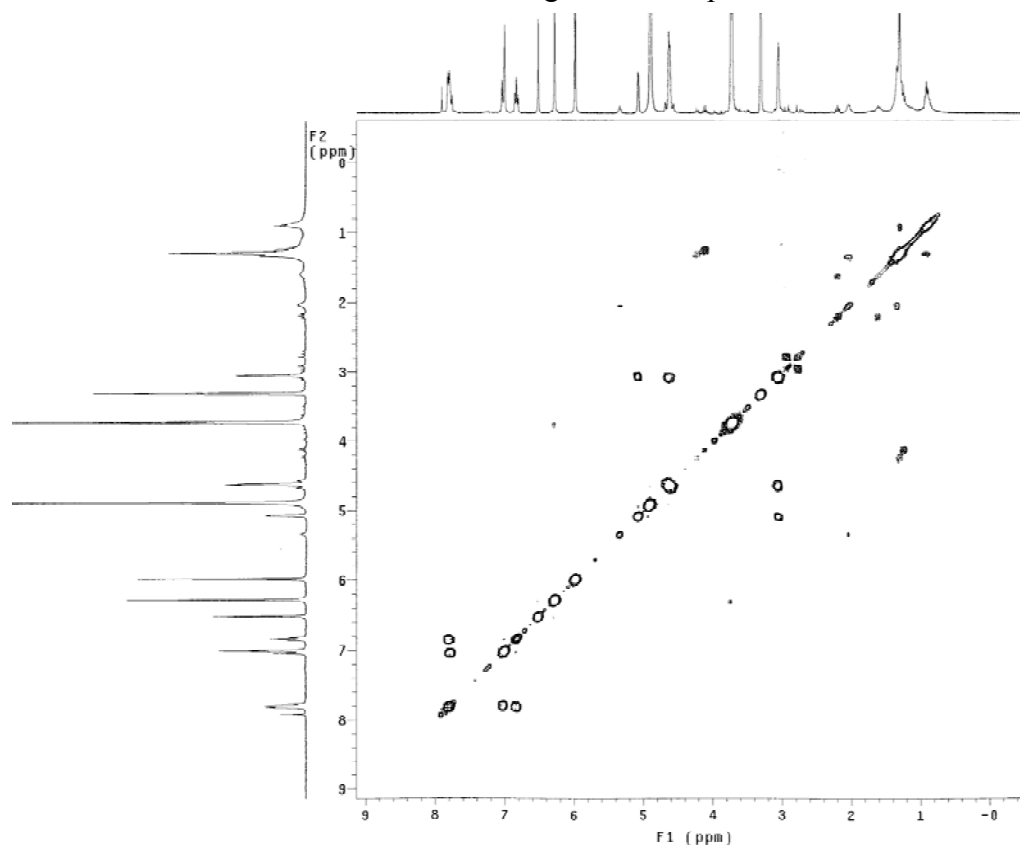

516

517

518

### 11.4. HMBC diagram of compound 3N.

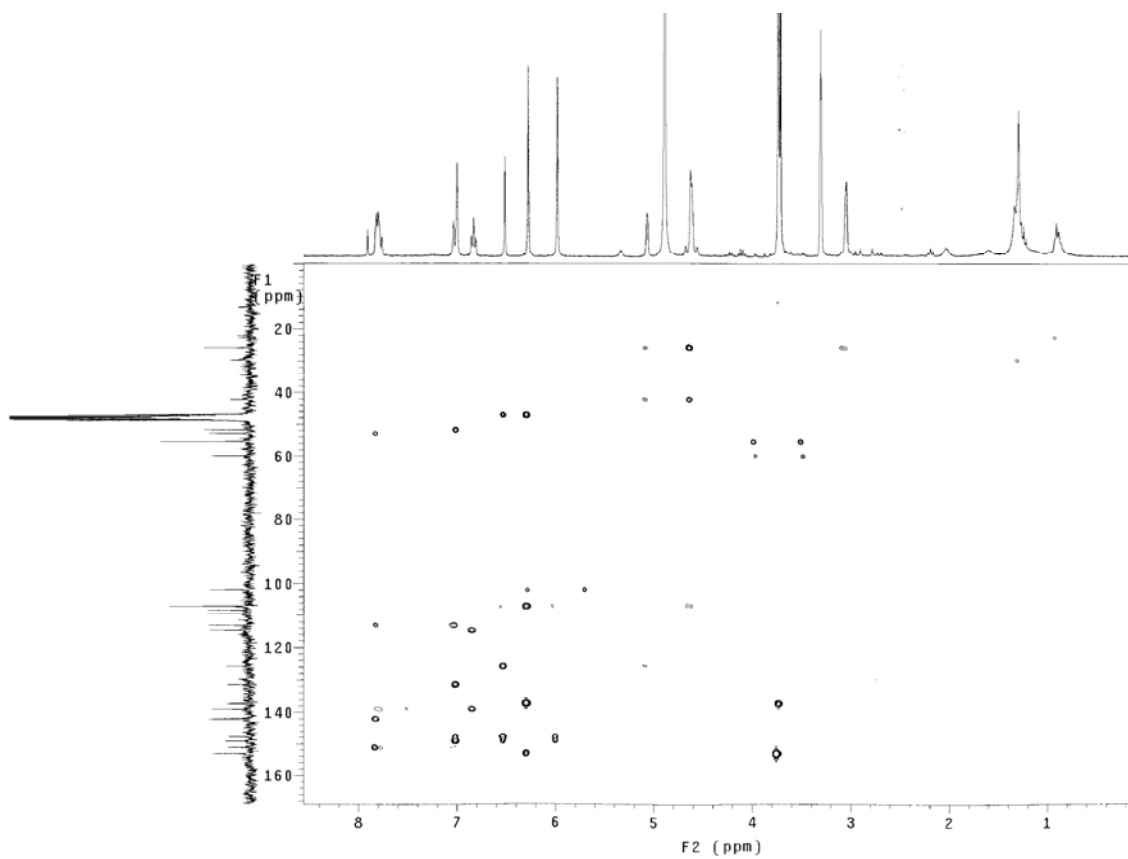

519

520



536

### 12.2. $^{13}\text{C}$ NMR spectrum of compound 4N

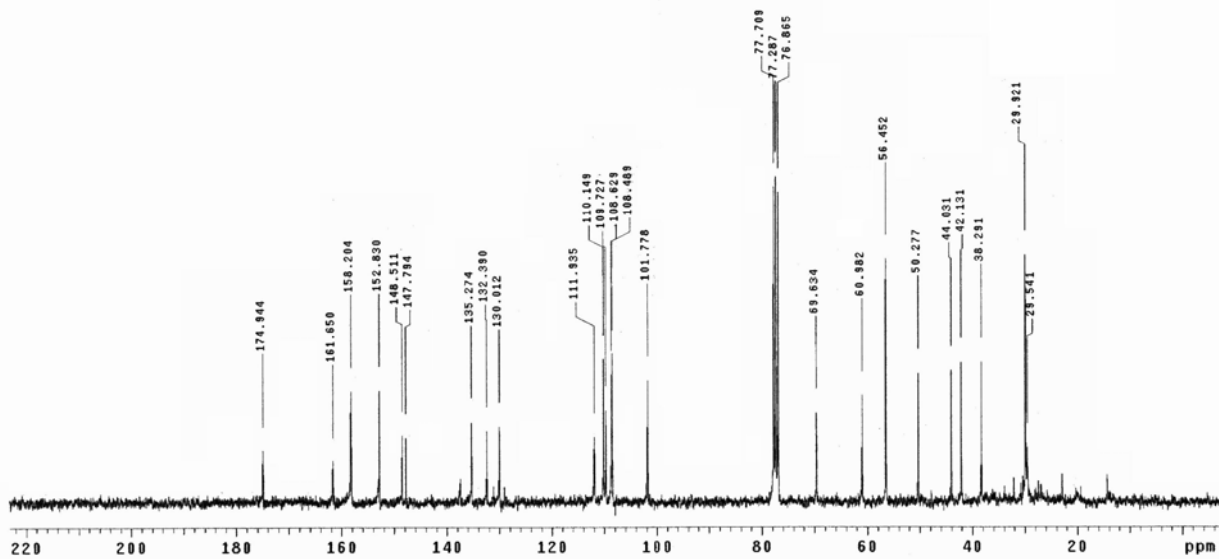

537

538

539

### 12.3. $^1\text{H}$ - $^1\text{H}$ COSY diagram of compound 4N

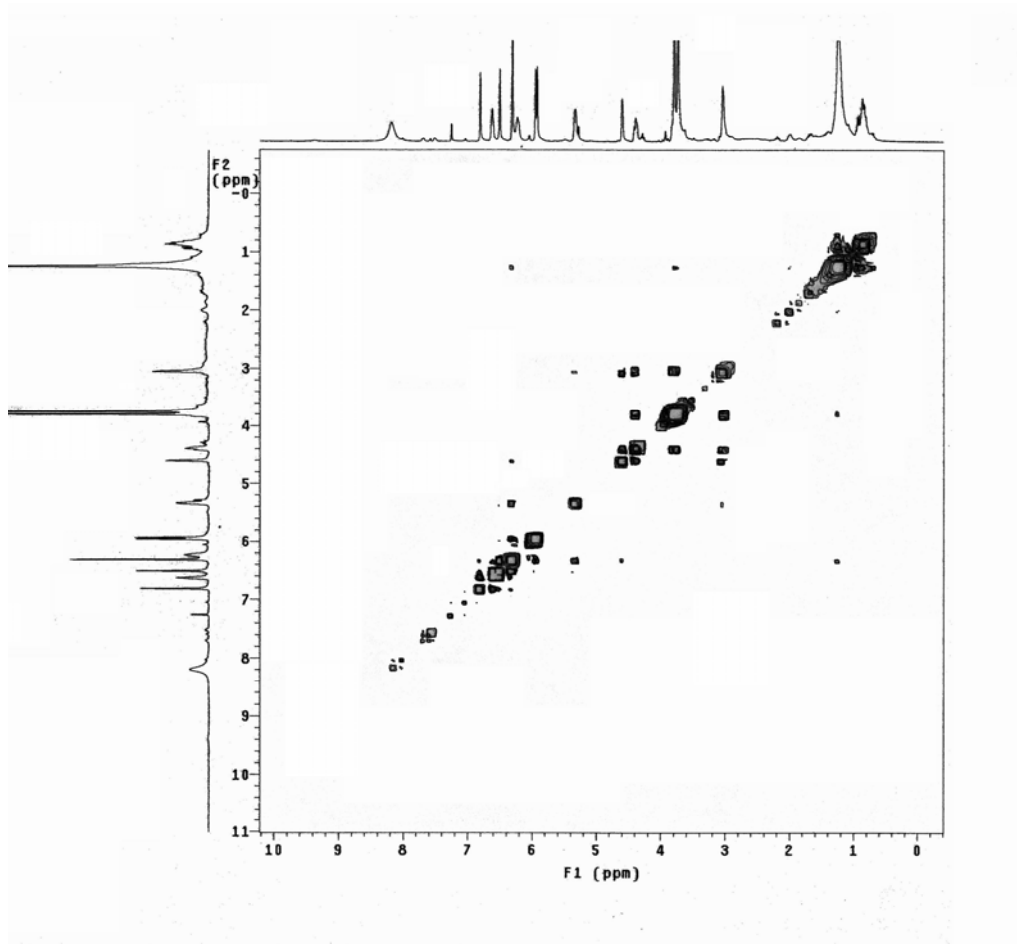

540

541

542

543

544

545

546

12.4. HMBC diagram of compound 4N

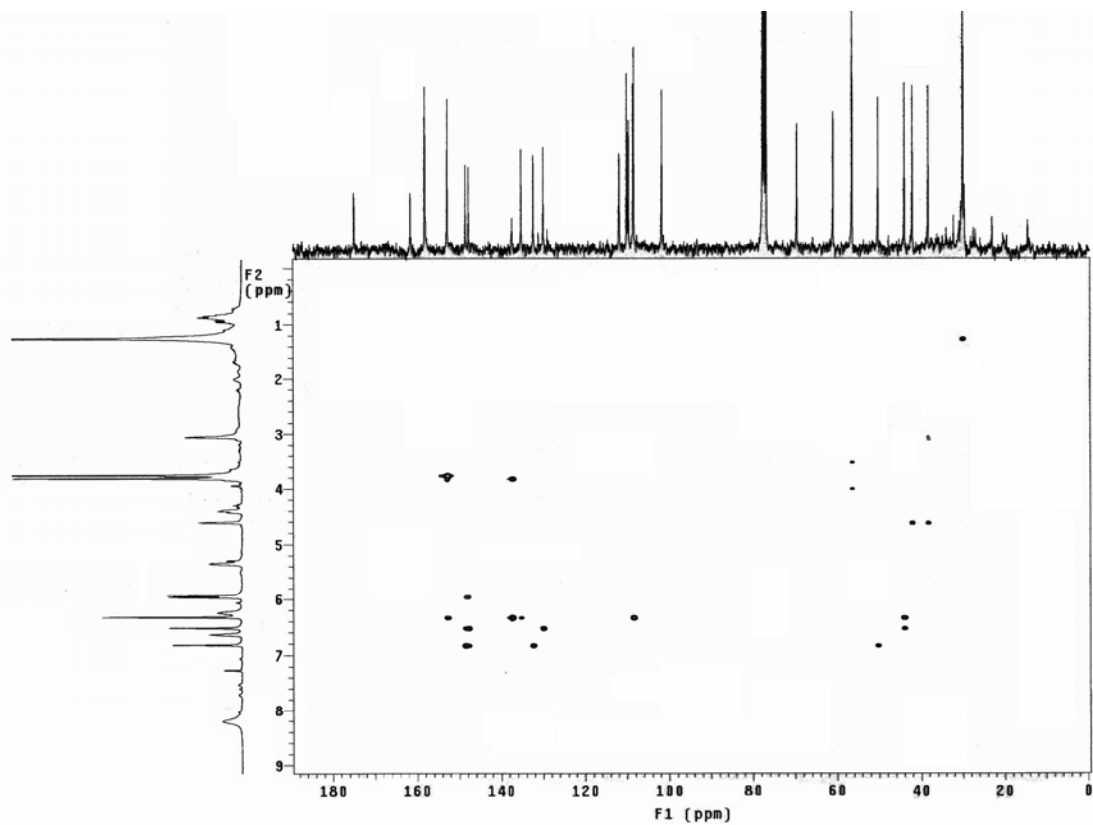

547

548

549

12.5. HSQC diagram of compound 4N

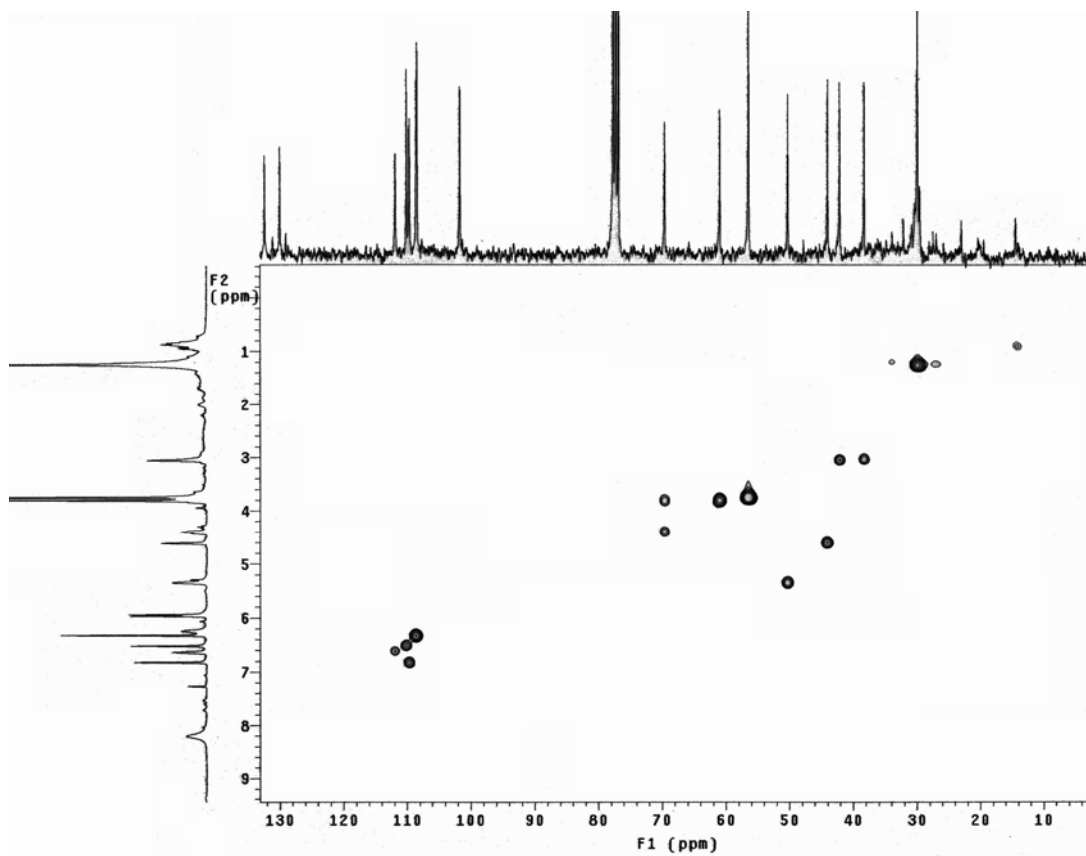

550

551  
552

## 12.6. MS spectrum of compound 4N

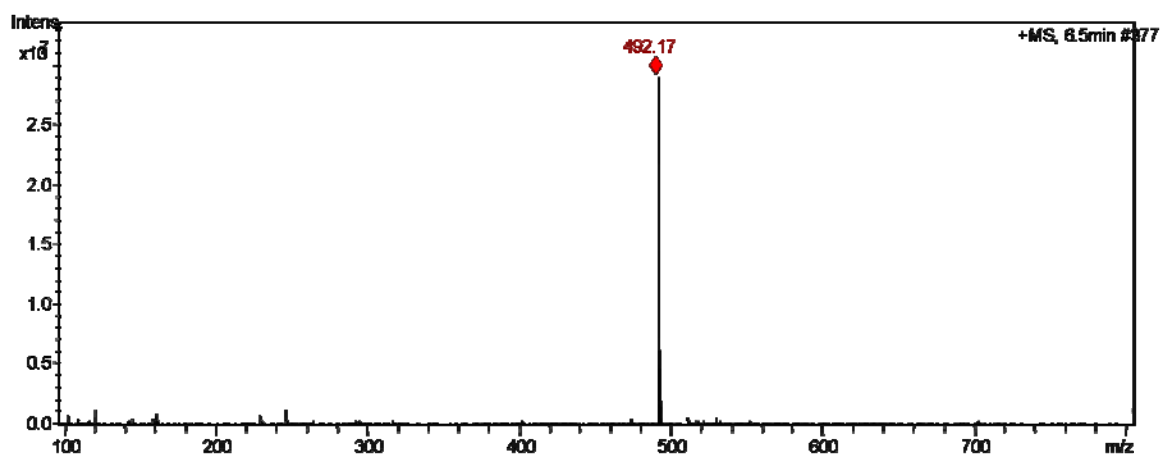

553  
554  
555  
556  
557  
558  
559  
560  
561  
562  
563  
564  
565

4 $\beta$ -N-(pyrimidine-2)-4-deoxy-podophyllotoxin (4N)

$^1\text{H}$  NMR (300 MHz,  $\text{CDCl}_3$ ,  $\delta$ ): 8.155 (s, 2H), 6.818 (s, 1H), 6.871 (s, 1H), 6.608 (s, 1H), 6.509 (s, 1H), 6.318 (s, 2H), 5.957 (d,  $J = 8.4$  Hz, 2H), 5.336 (s, 1H), 4.601 (s, 1H), 4.398 (t,  $J = 0.6$  Hz, 1H), 3.801 (s, 3H), 3.744 (s, 6H), 3.046 (s, 3H);  $^{13}\text{C}$  NMR (75 MHz,  $\text{CDCl}_3$ ,  $\delta$ ): 174.944, 161.650, 158.204 (2C), 152.830 (2C), 148.511, 147.794, 135.274, 132.390, 130.012, 111.935, 110.149, 109.727, 108.629, 108.489 (2C), 101.778, 69.634, 60.982, 56.452 (2C), 50.277, 44.031, 42.131, 38.291.

ESI-MS: calc'd for  $\text{C}_{26}\text{H}_{25}\text{N}_3\text{O}_7$   $[\text{M}+\text{H}]^+$ : 492.17, found 492.17  $[\text{M}+\text{H}]^+$ .

## 13.1. $^1\text{H}$ NMR spectrum of compound 5N

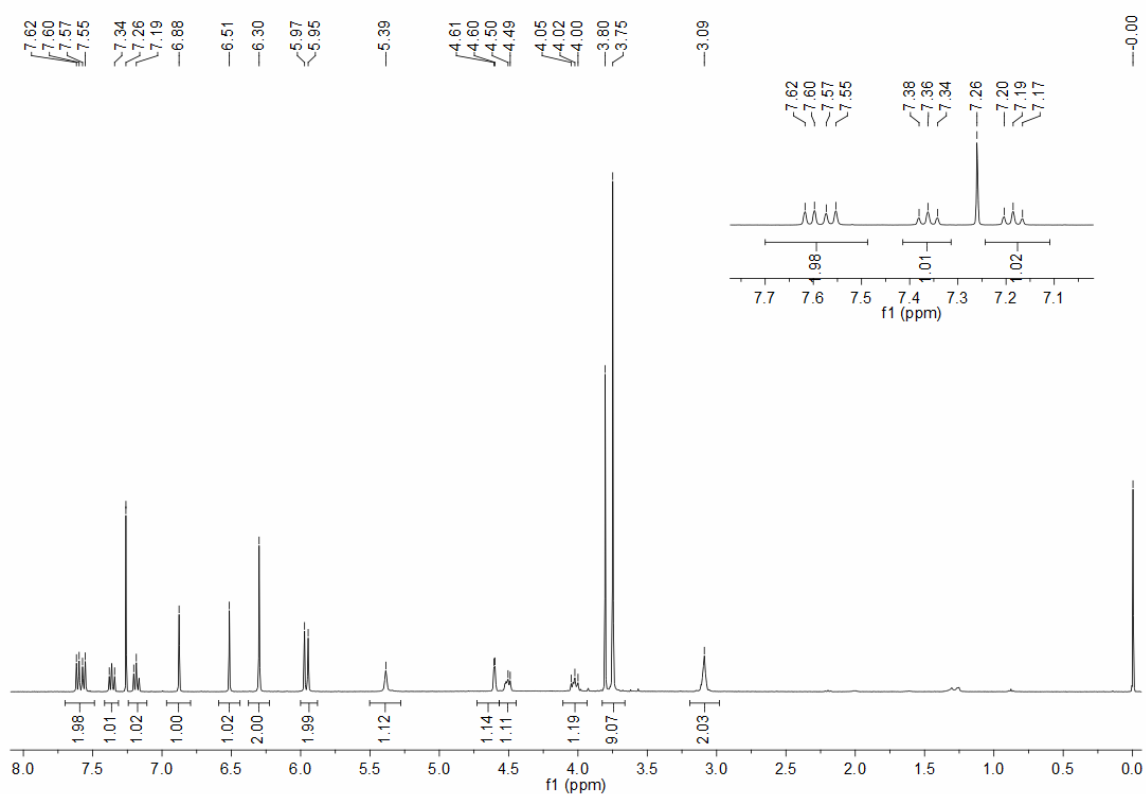

566  
567

568

569

13.3.  $^1\text{H}$ - $^1\text{H}$  COSY diagram of compound 5N

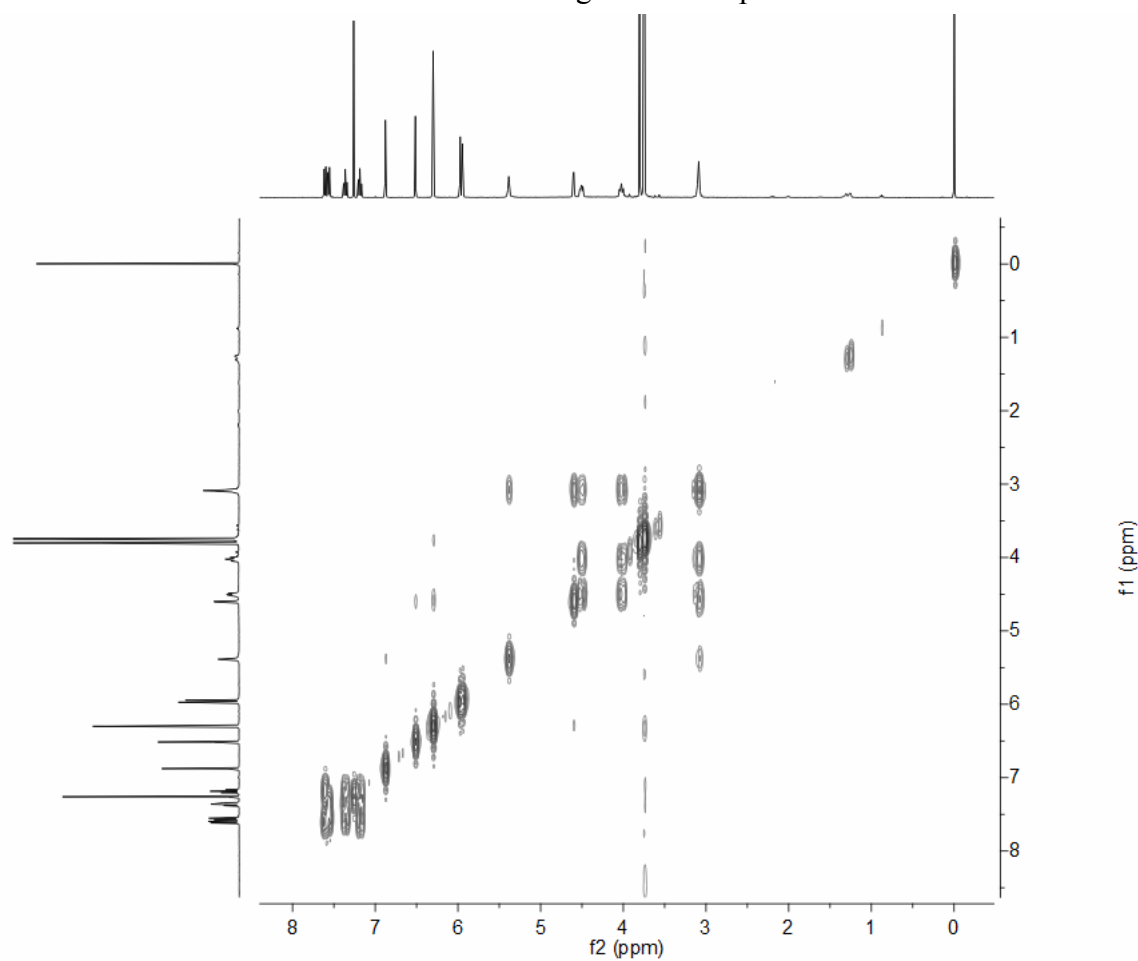

570

571

572

13.4. HMBC diagram of compound 5N

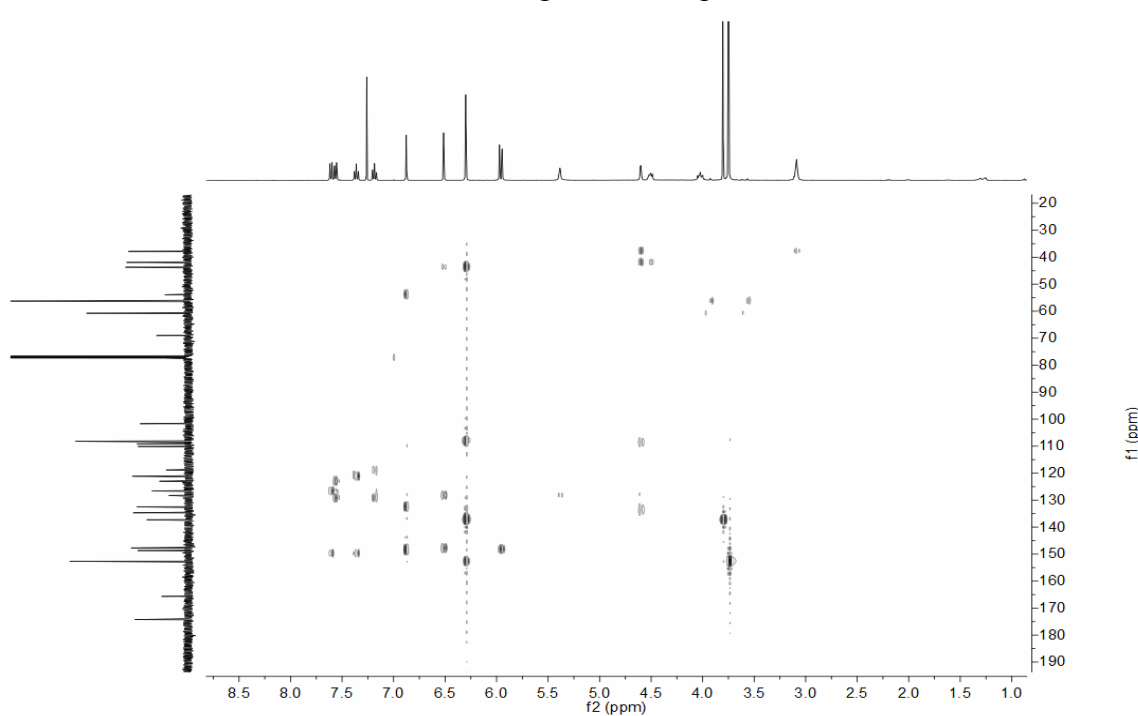

573

574

575

## 13.5. HSQC diagram of compound 5N

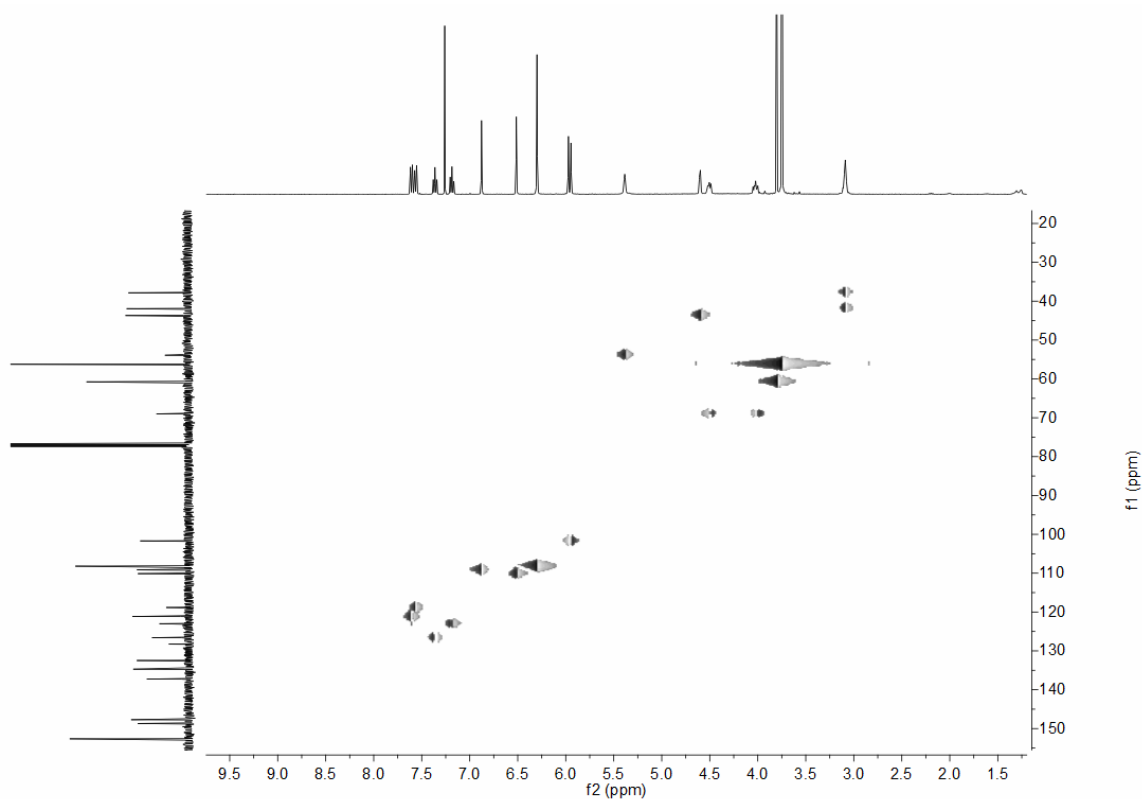

576

577

## 13.6. MS spectrum of compound 5N

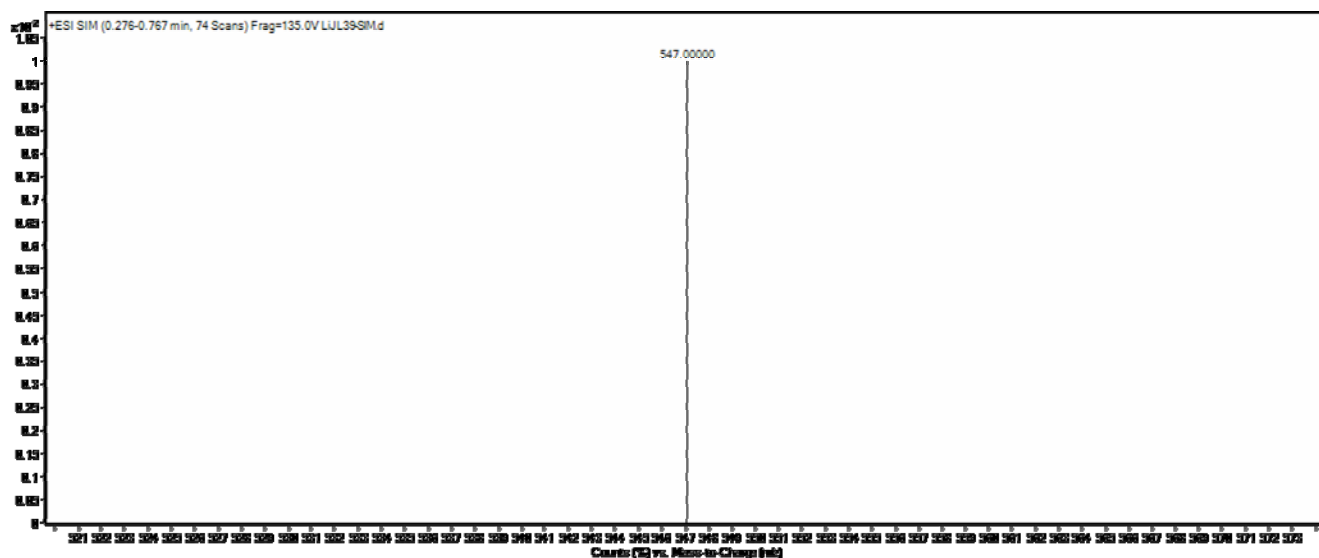

578

579

580 4 $\beta$ -N-(pyrimidine-2)-4-deoxy-podophyllotoxin (5N)

581  $^1\text{H}$  NMR (400 MHz,  $\text{CDCl}_3$ ,  $\delta$ ): 7.62 (d,  $J = 8.0$  Hz, 1H), 7.57 (d,  $J = 8.0$  Hz, 1H), 7.36 (t,  $J = 8.0$  Hz, 1H), 7.19  
 582 (t,  $J = 4.0$  Hz, 1H), 6.88 (s, 1H), 6.51 (s, 1H), 6.30 (s, 2H), 5.97 (d,  $J = 8.0$  Hz, 2H), 5.39 (s, 1H), 4.61 (d,  $J =$   
 583 4.0 Hz, 1H), 4.50 (t,  $J = 4.0$  Hz, 1H), 4.02 (t,  $J = 8.0$  Hz, H), 3.80 (s, 3H), 3.75 (s, 6H), 3.11-3.07 (m, 2H);  $^{13}\text{C}$   
 584 NMR(101 MHz,  $\text{CDCl}_3$ ,  $\delta$ ): 174.25, 165.66, 152.63 (2C), 148.68, 147.72 (2C), 137.27, 134.70, 132.48, 128.27,  
 585 126.61, 123.00, 121.15, 118.83 (2C), 110.12, 109.16, 108.19 (2C), 101.69, 69.00, 60.75, 56.24 (2C), 53.91, 43.69,  
 586 41.92, 37.84.

587 ESI-MS: calc'd for  $\text{C}_{29}\text{H}_{26}\text{N}_2\text{O}_7\text{S}$   $[\text{M}+\text{H}]^+$ : 547.14, found 547.00  $[\text{M}+\text{H}]^+$ .

588



589

14.1.  $^1\text{H}$  NMR spectrum of compound 6N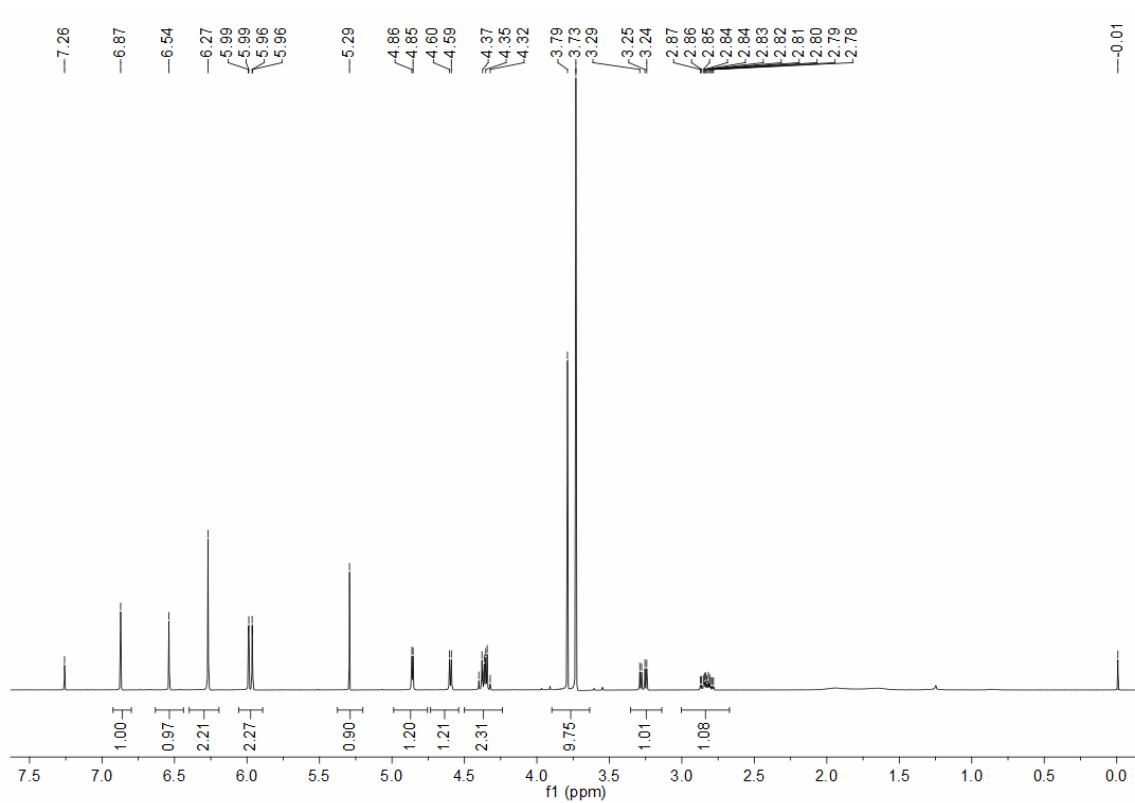

590

591

592

14.2.  $^{13}\text{C}$  NMR spectrum of compound 6N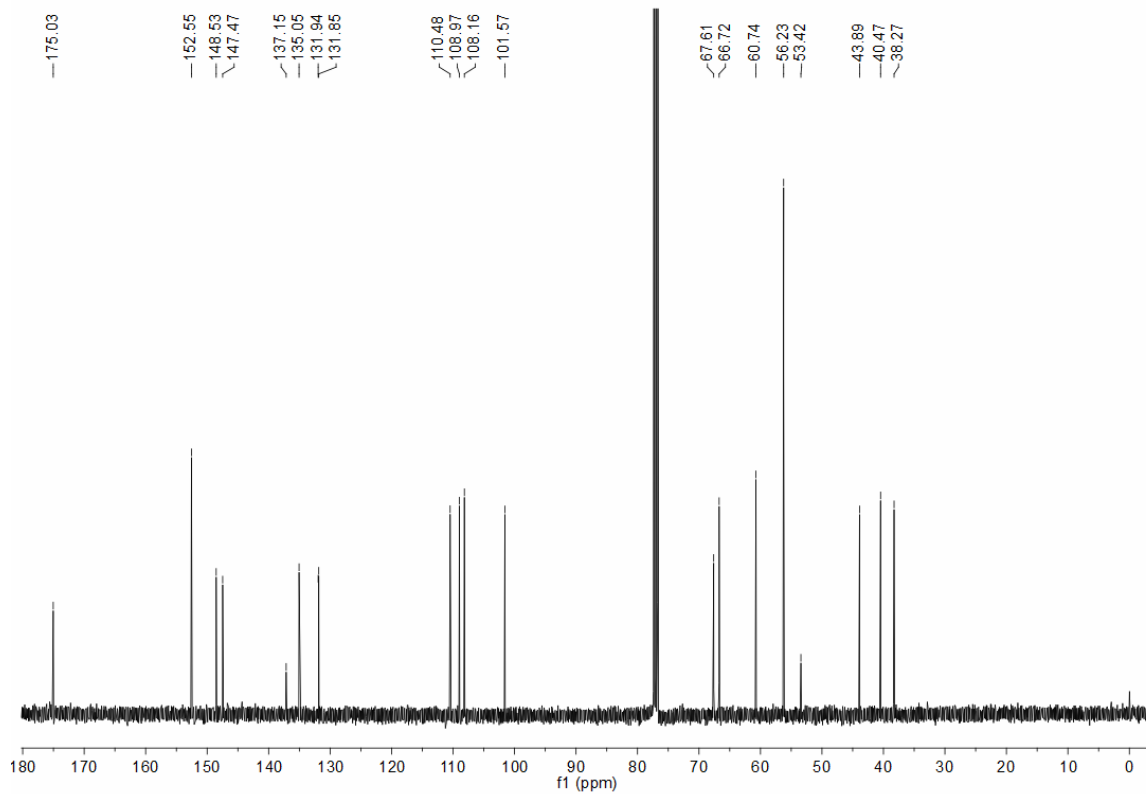

594

595

596

597

14.3.  $^1\text{H}$ - $^1\text{H}$  COSY diagram of compound 6N

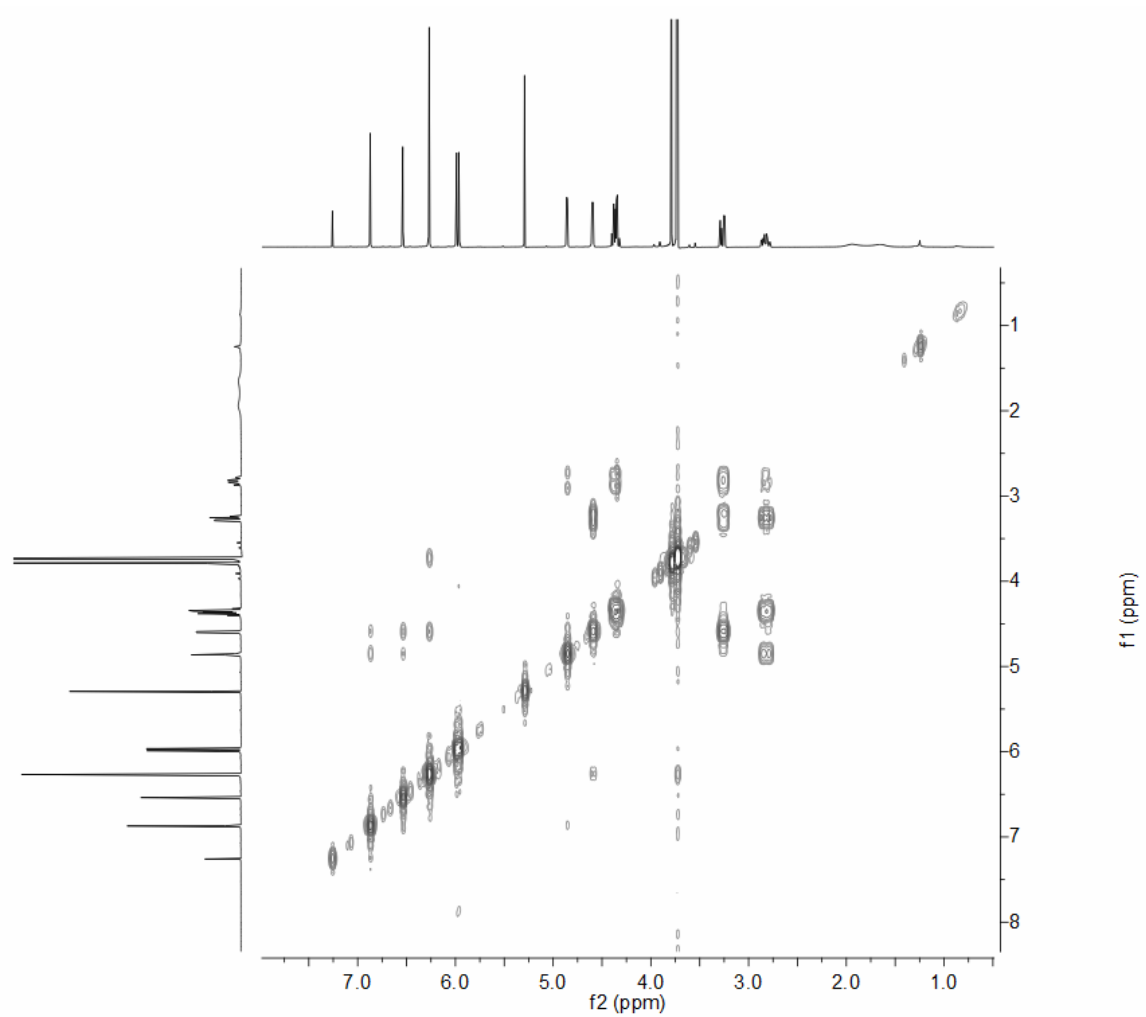

598

599

14.3. HMBC diagram of compound 6N

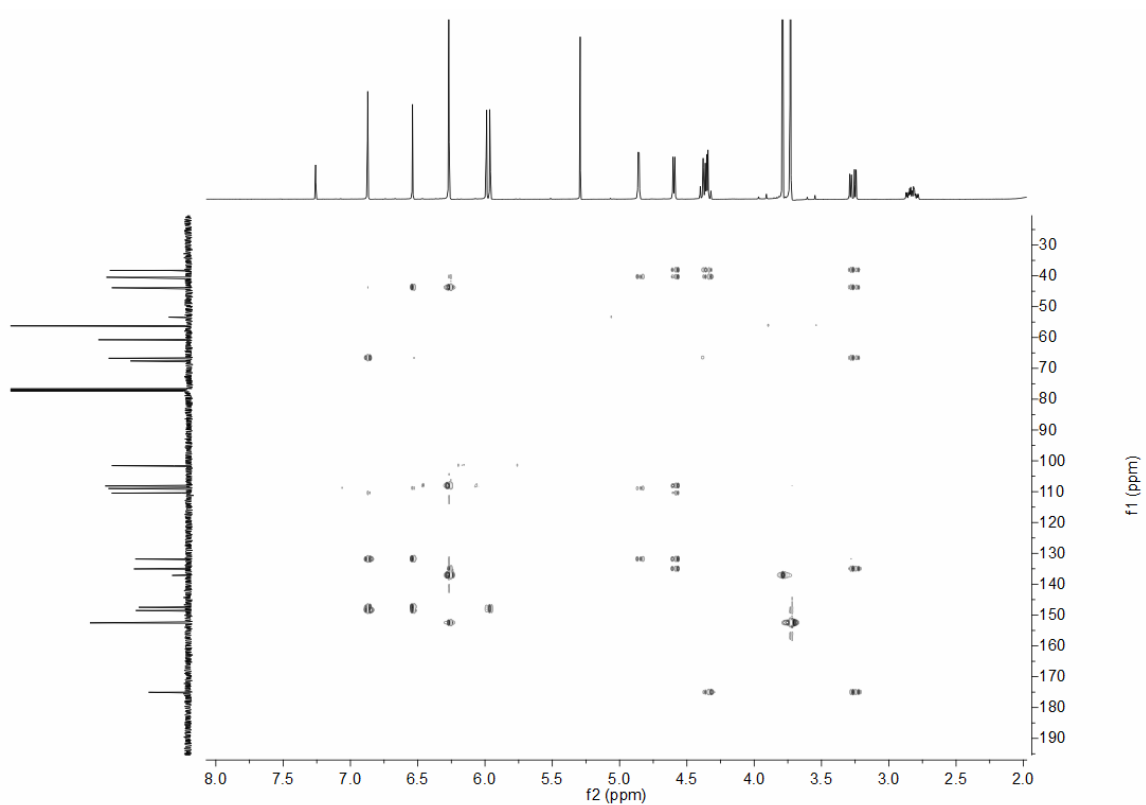

600

601  
602

### 14.5. HSQC diagram of compound 6N

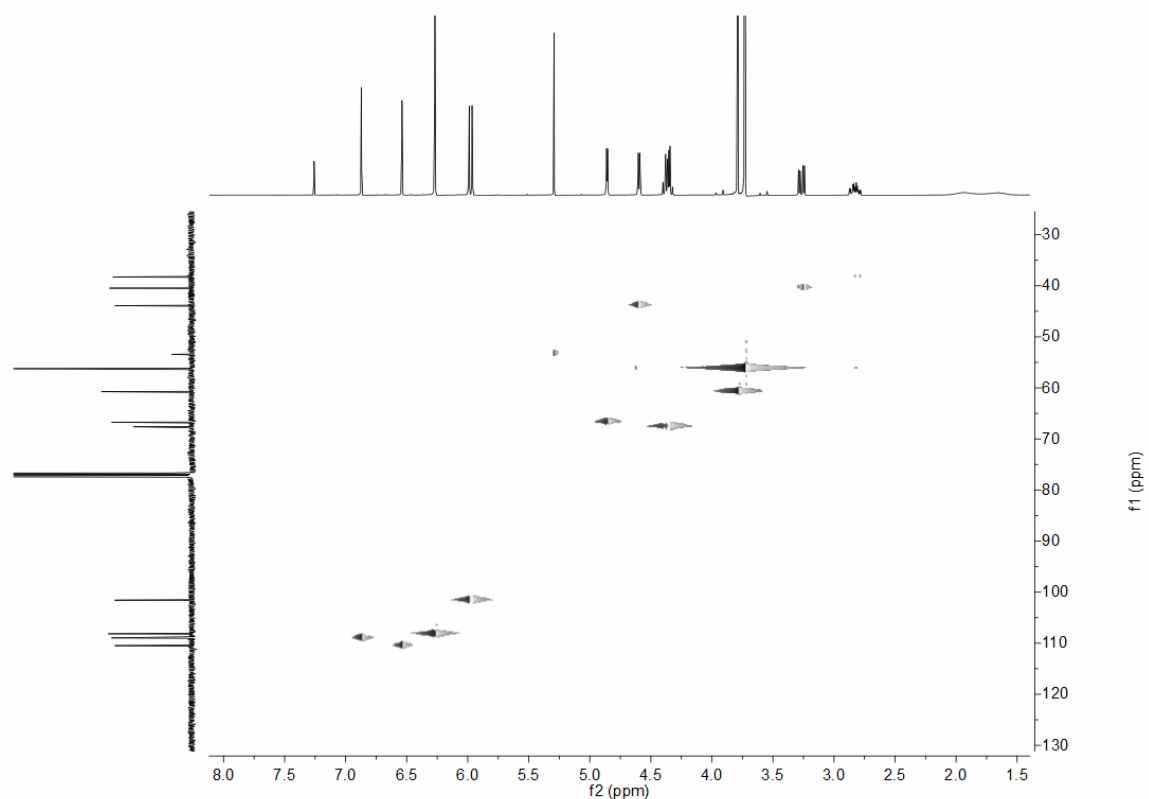

603  
604  
605

### 14.6 MS spectrum of compound 6N

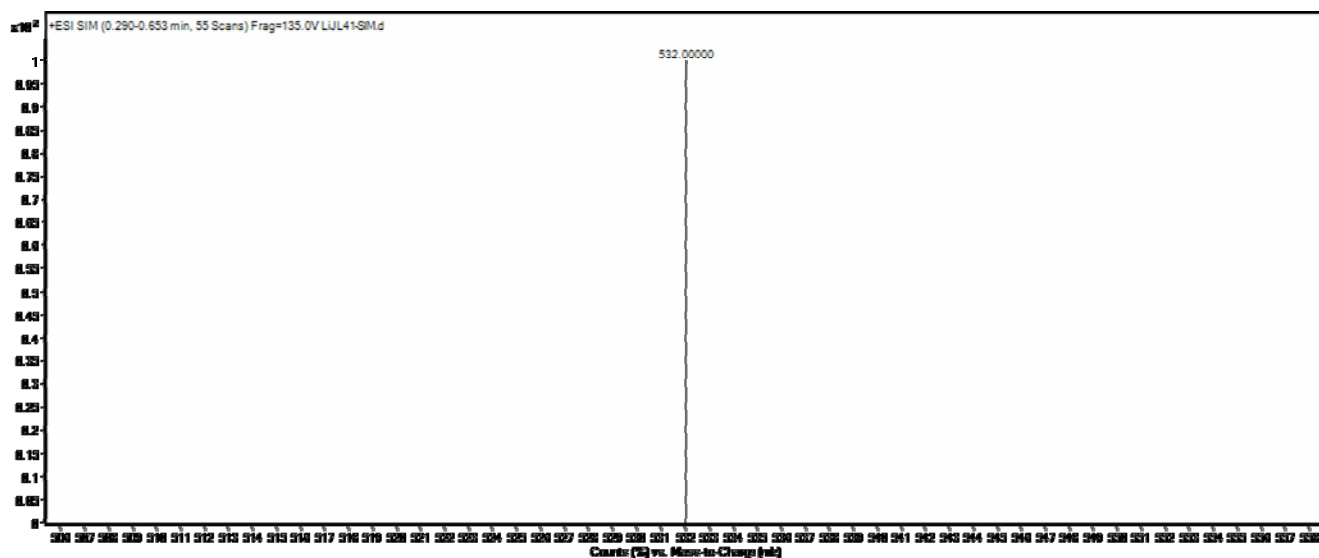

606  
607  
608  
609  
610  
611  
612  
613  
614

4 $\beta$ -N-(pyrimidine-2)-4-deoxy-podophyllotoxin (6N)

$^1\text{H}$  NMR (400 MHz,  $\text{CDCl}_3$ ,  $\delta$ ): 6.87 (s, 1H), 6.54 (s, 1H), 6.27 (s, 2H), 5.99 (d,  $J = 12.0$  Hz, 2H), 5.29 (s, 1H), 4.86 (d,  $J = 4.0$  Hz, 1H), 4.60 (d,  $J = 4.0$  Hz, 1H), 4.40-4.32 (m, 2H), 3.79 (s, 3H), 3.73 (s, 6H), 3.29-3.24 (m, 1H), 2.87-2.78 (m, 1H);  $^{13}\text{C}$  NMR (101 MHz,  $\text{CDCl}_3$ ,  $\delta$ ): 175.03 (2C), 152.55 (2C), 148.53 (2C), 147.47, 137.15, 135.05 (2C), 131.94, 131.85, 110.48 (2C), 108.97, 108.16 (2C), 101.57, 67.61, 66.72, 60.74, 56.23 (2C), 53.42, 43.89, 40.47, 38.27.

ESI-MS: calc'd for  $\text{C}_{27}\text{H}_{25}\text{N}_5\text{O}_7$   $[\text{M}+\text{H}]^+$ : 532.18, found 532.00  $[\text{M}+\text{H}]^+$ .

615

### 15.1. <sup>1</sup>H NMR spectrum of compound 1'N

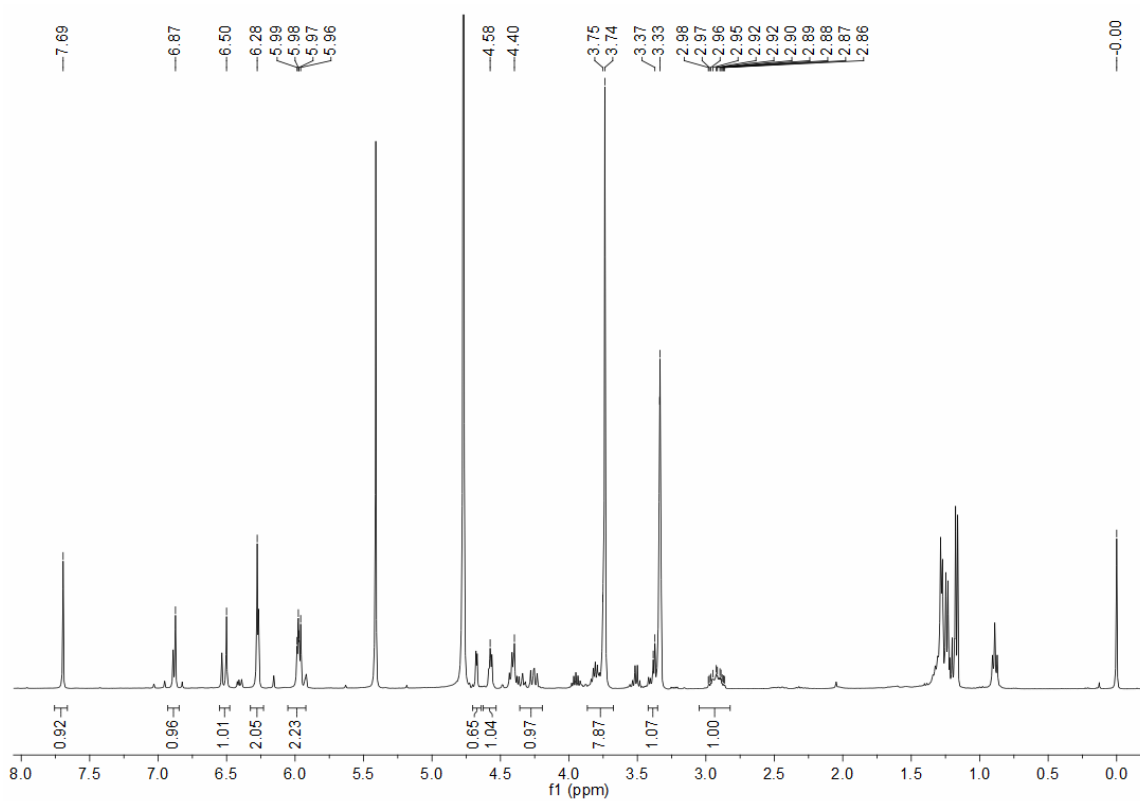

616

617

618

619

### 15.2. <sup>13</sup>C NMR spectrum of compound 1'N

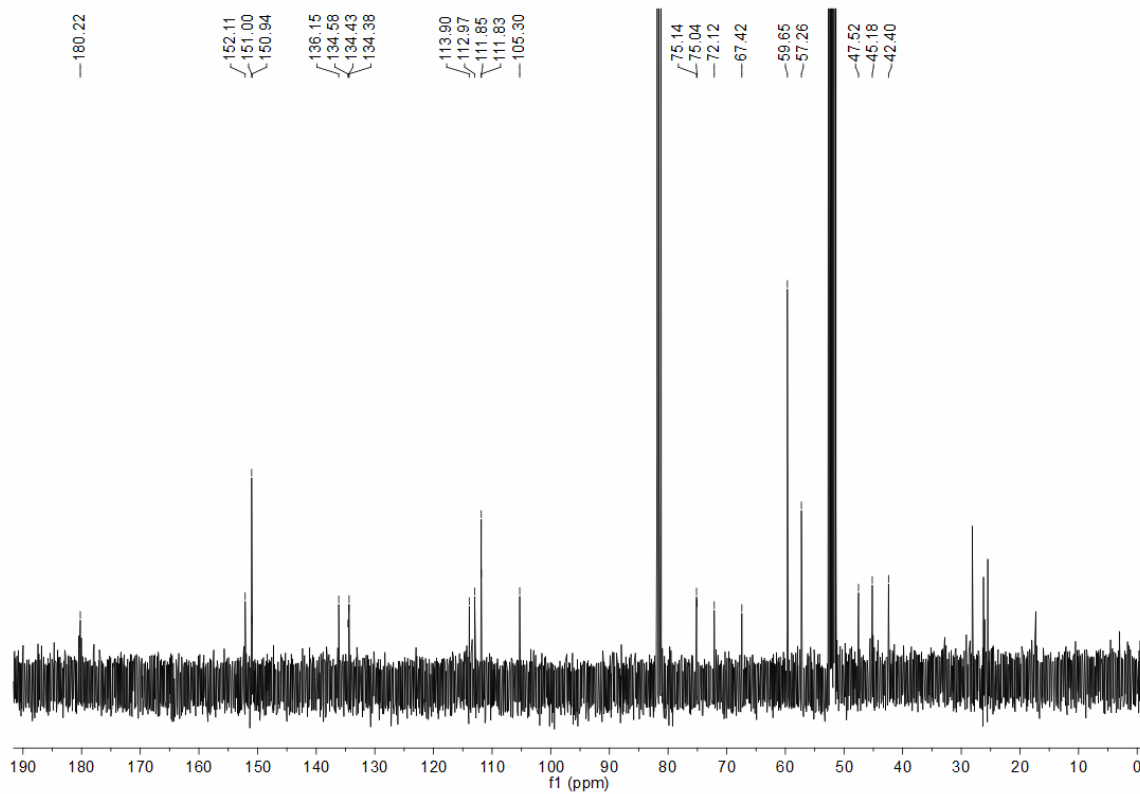

620

621

622

623 15.3.

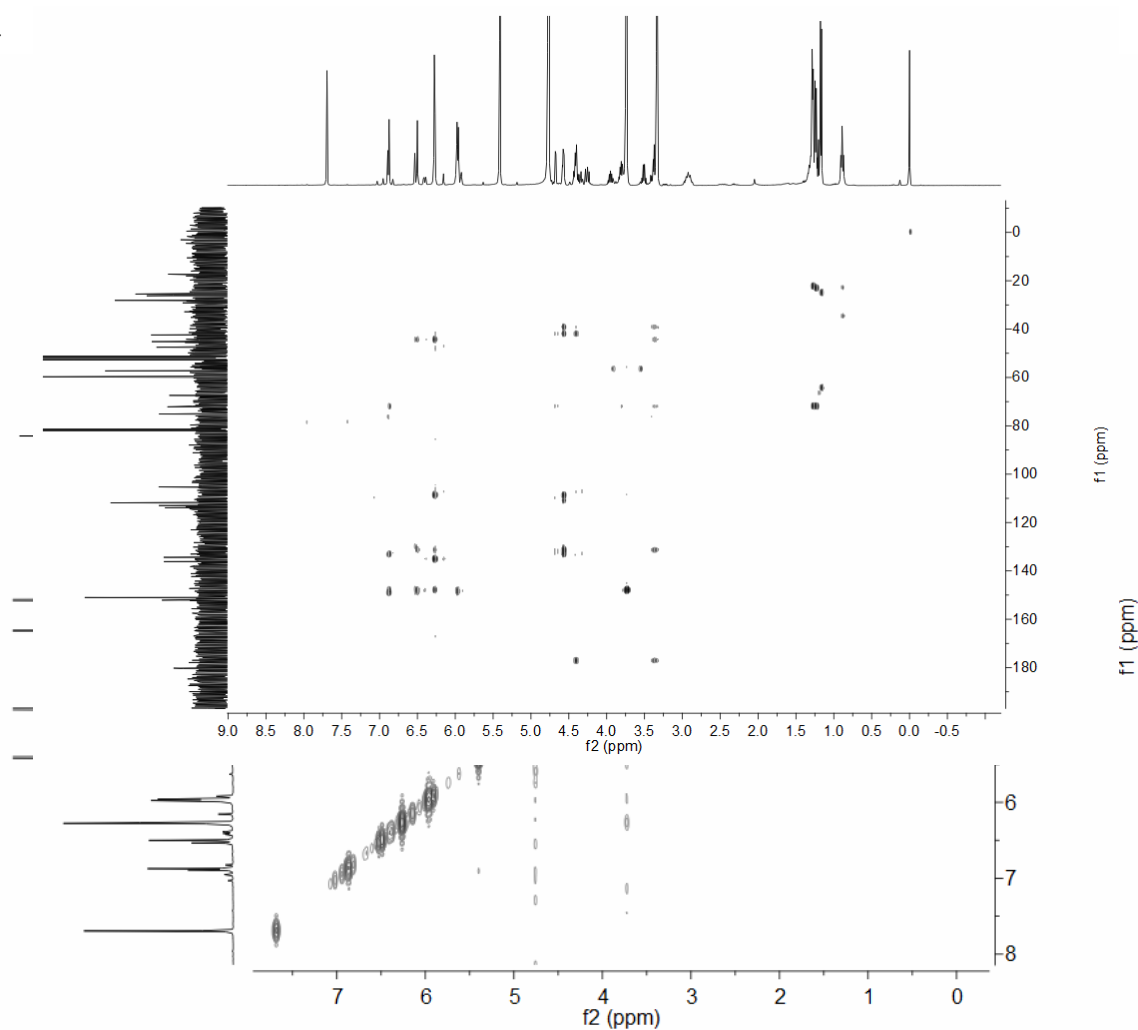

625  $^1\text{H}$ - $^1\text{H}$  COSY diagram of compound 1'N

626  
627 15.4. HMBC diagram of compound 1'N

628

629

630

631

632

633

634

635

636

637

638

639

640

641

642

643

644  
645

### 15.5. HSQC diagram of compound 1'N

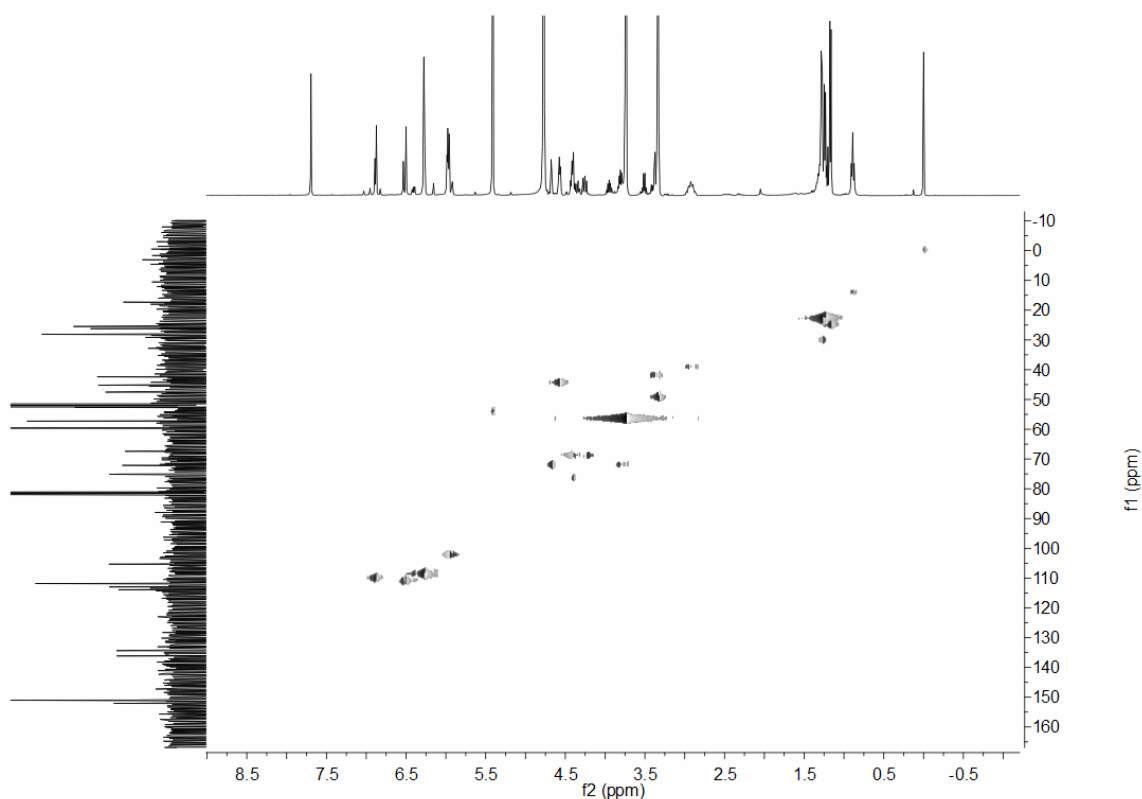

646  
647  
648

### 15.6. MS spectrum of compound 1'N

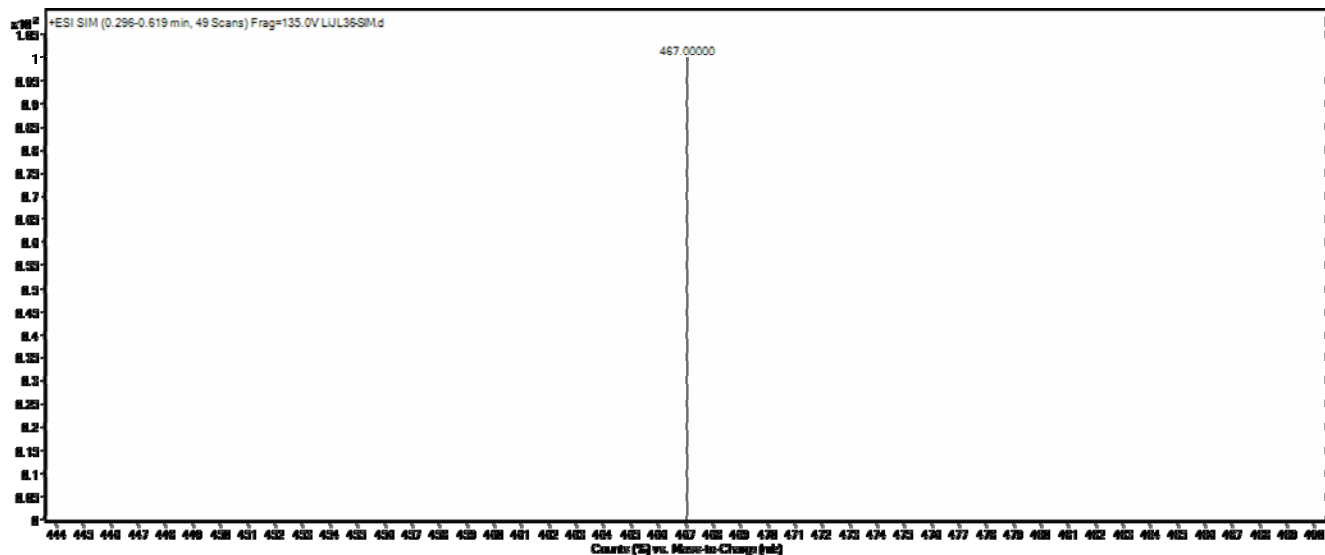

649  
650  
651  
652  
653  
654  
655  
656  
657  
658

4 $\beta$ -N-(1,2,4-triazole-3)-4-deoxy-4'-demethyl-podophyllotoxin (1'N)

$^1\text{H}$  NMR(400 MHz,  $\text{CD}_3\text{OD}$ ,  $\text{CD}_3\text{Cl}$ ):  $\delta$  6.87 (s, 1H), 6.50 (s, 1H), 6.28 (s, 2H), 5.98 (d, 2H,  $J = 8.0$  Hz), 5.805 (d, 1H,  $J = 1.8$  Hz), 5.439 (s, 1H), 4.691 (d, 1H), 4.618 (d, 1H,  $J = 2.4$  Hz), 4.522 (t, 1H  $J = 4.5$  Hz), 3.896 (t, 1H,  $J = 4.8$  Hz), 3.796 (s, 6H), 3.379 (t, 1H,  $J = 2.1$ Hz), 3.190 (dd, 1H,  $J = 2.4$ Hz);  $^{13}\text{C}$  NMR (101 MHz,  $\text{CD}_3\text{OD}$ ,  $\text{CD}_3\text{Cl}$ ):  $\delta$  180.22, 152.11, 151.00, 150.94, 136.15, 134.58, 134.43, 134.38, 113.90, 112.97, 111.85, 111.83, 105.30, 75.14, 75.04, 72.12, 67.42, 59.65 (2C), 57.26, 47.52, 45.18, 42.40.

ESI-MS: calc'd for  $\text{C}_{23}\text{H}_{22}\text{N}_4\text{O}_7$   $[\text{M}+\text{H}]^+$  : 467.15, found 467.00  $[\text{M}+\text{H}]^+$ .

659

### 16.1. <sup>1</sup>H NMR spectrum of compound 2'N

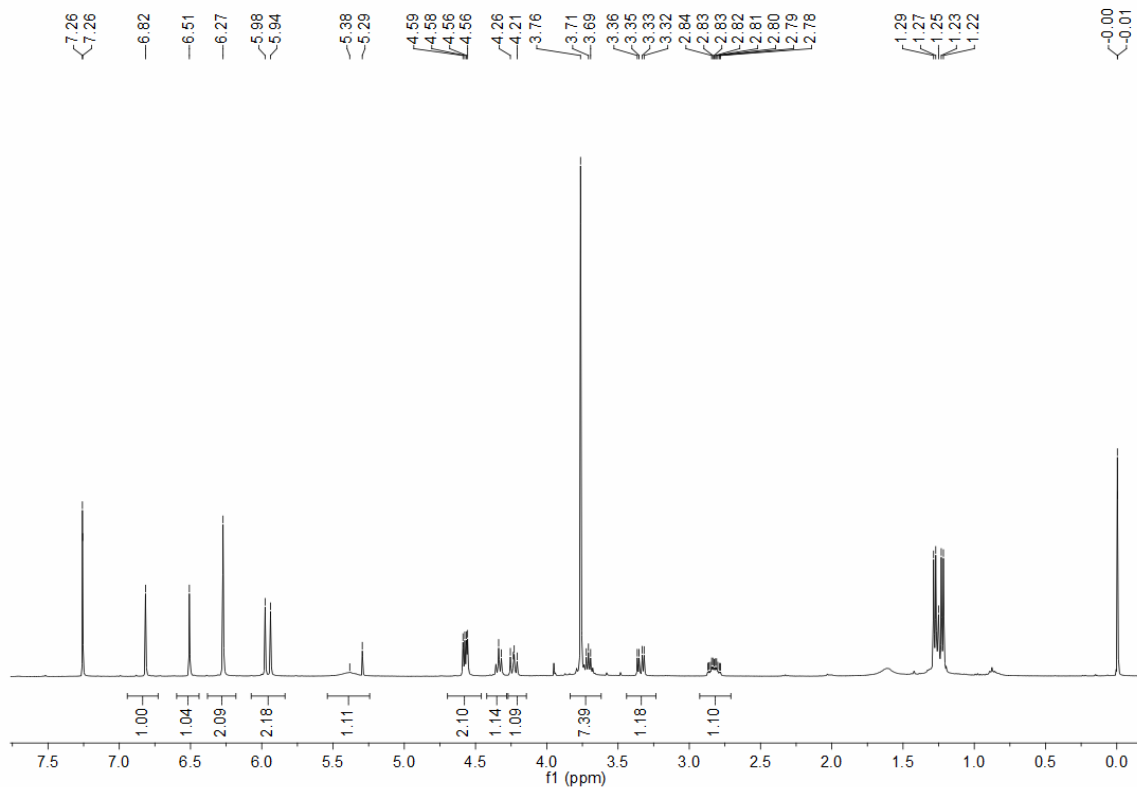

660

661

662

663

### 16.2. <sup>13</sup>C NMR spectrum of compound 2'N

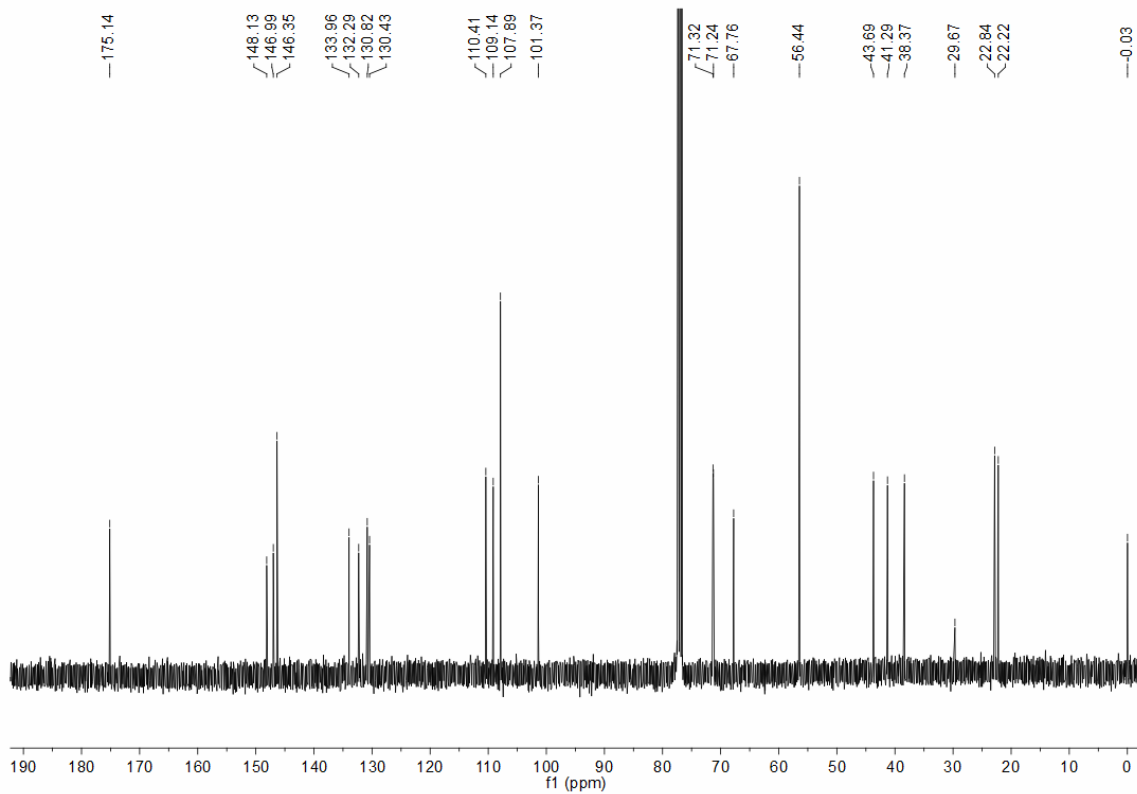

664

665

666

667

### 16.3. $^1\text{H}$ - $^1\text{H}$ COSY diagram of compound 2'N

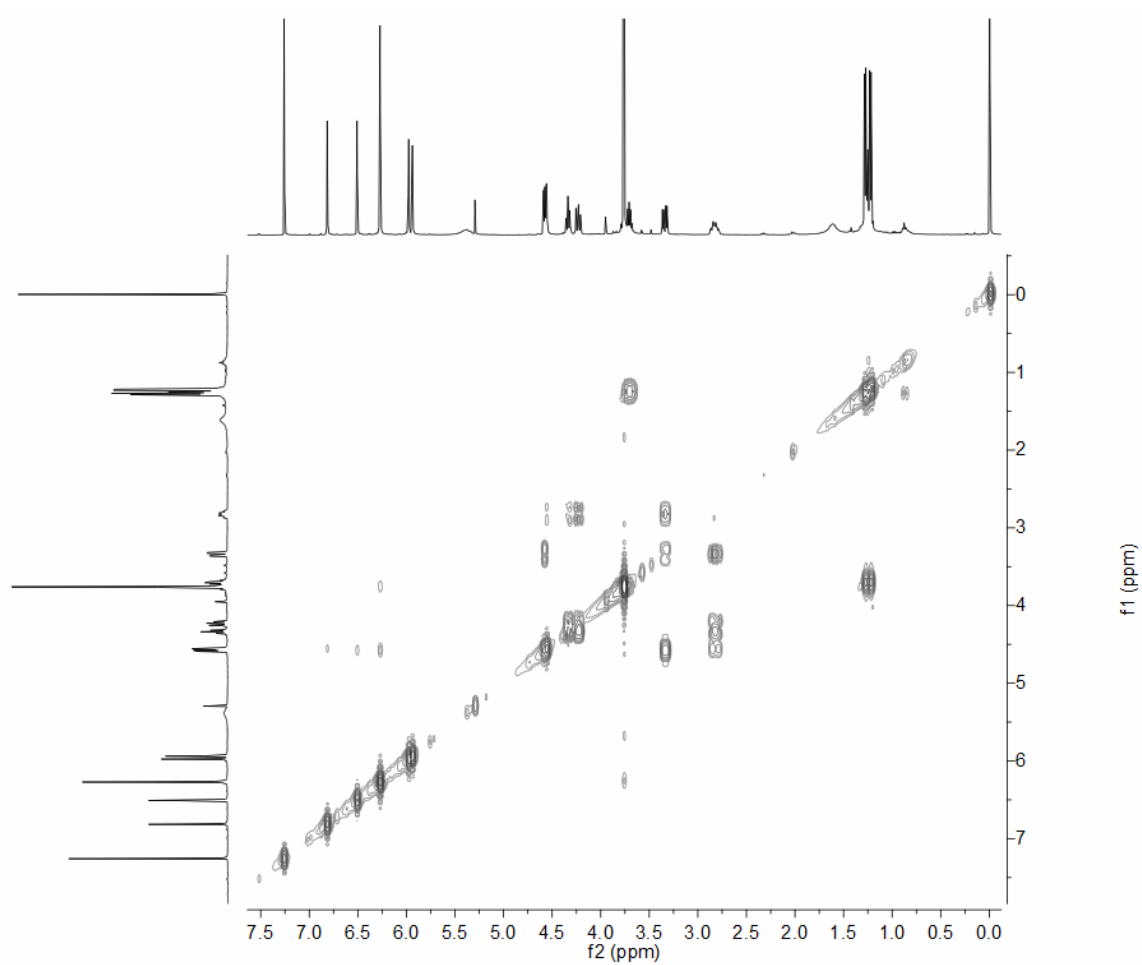

668

669

### 16.4. HMBC diagram of compound 2'N

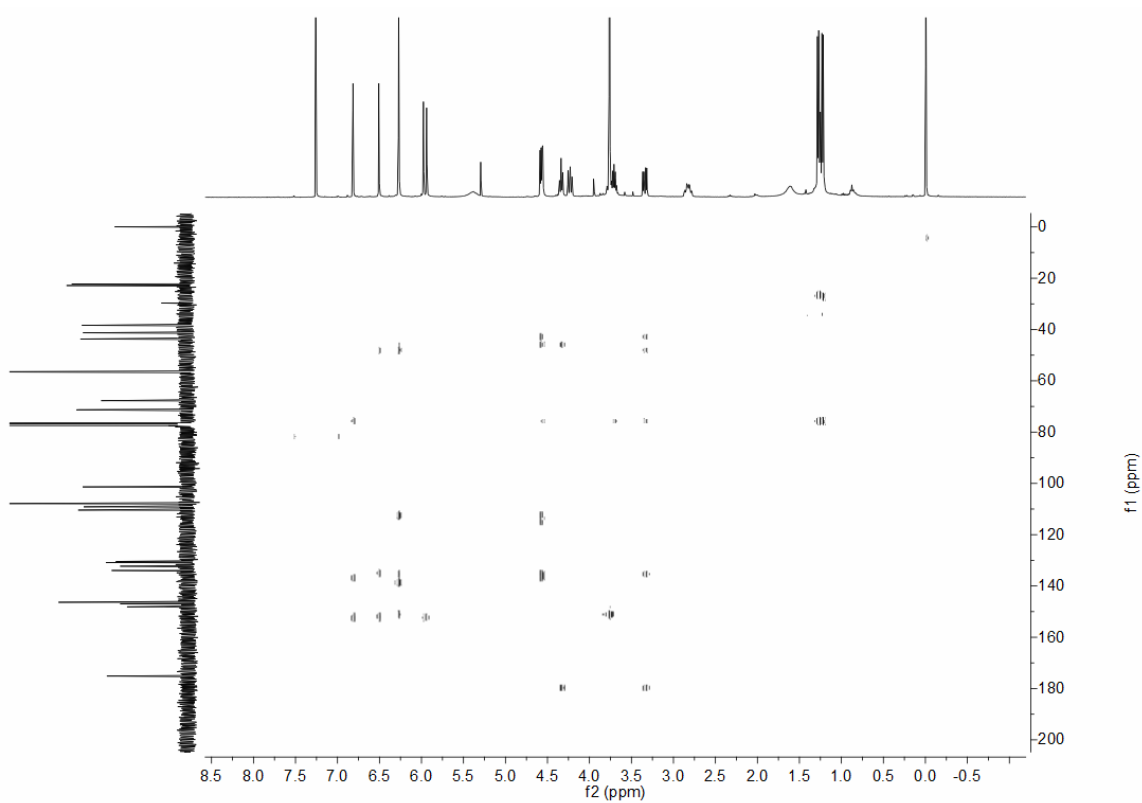

670

671



672

## 16.5. HSQC diagram of compound 2'N

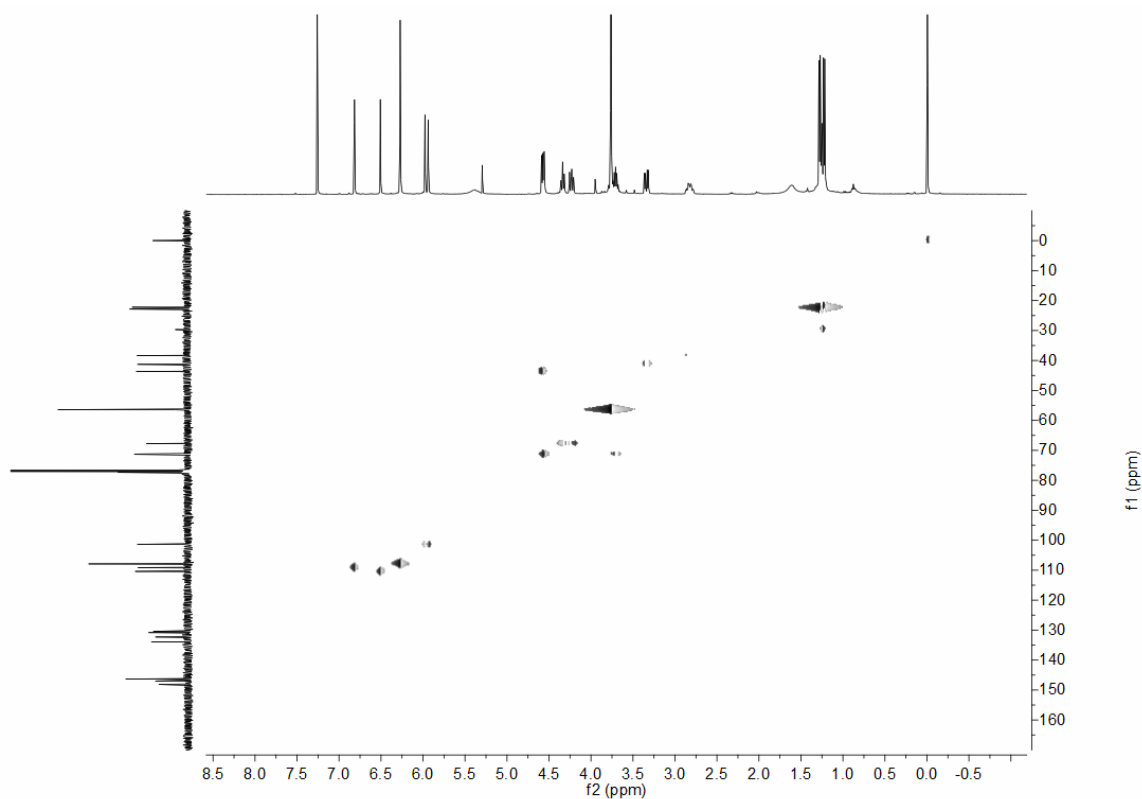

673

674

## 16.6. MS spectrum of compound 2'N

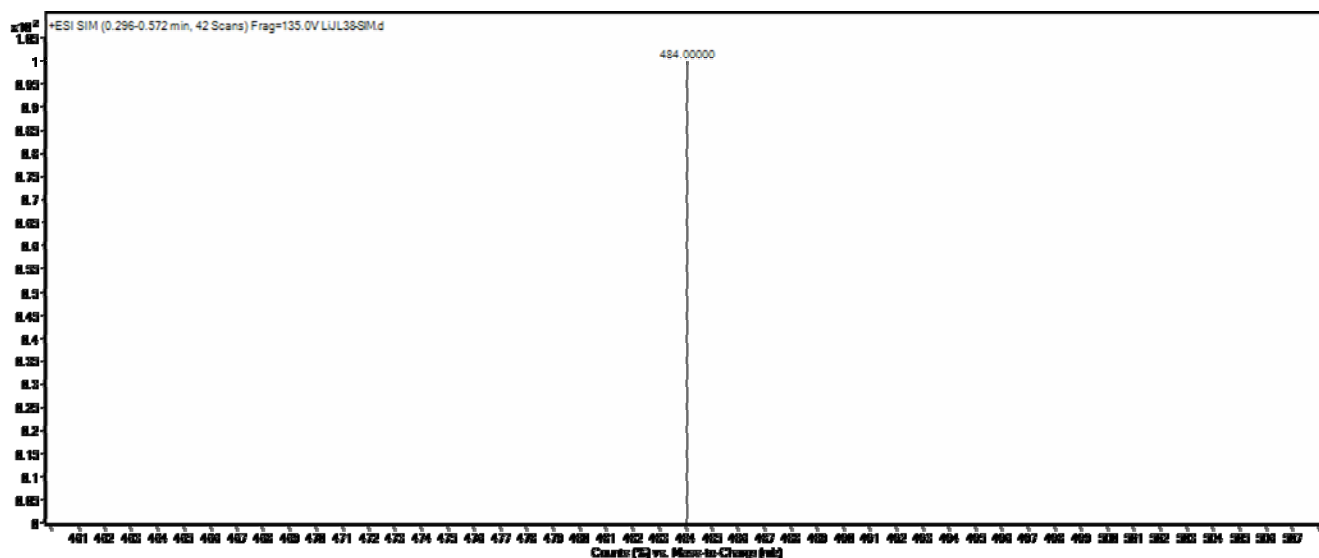

675

676

677 4 $\beta$ -N-(1,3,4-thiodizole-2)-4-deoxy-4'-demethyl-podophyllotoxin (2'N)

678  $^1\text{H}$  NMR(400 MHz,  $\text{CDCl}_3$ ):  $\delta$  6.82 (s, 1H), 6.51 (s, 1H), 6.27 (s, 2H), 5.98 (d,  $J = 16.0$  Hz, 2H), 5.38 (s, 1H),  
 679 4.59 (dd,  $J = 4.0$  Hz, 2H), 4.34 (t,  $J = 4.0$  Hz, 1H), 4.23 (t,  $J = 8.0$  Hz, 1H), 3.76(s, 6H), 3.71 (t,  $J = 8.0$  Hz, 1H),  
 680 3.36-3.32 (m, 1H), 2.87-2.78 (m, 1H);  $^{13}\text{C}$  NMR (101 MHz,  $\text{CDCl}_3$ ):  $\delta$  175.14, 148.13, 146.99 (2C), 146.35,  
 681 133.96, 132.29, 130.82, 130.43, 110.41, 109.14, 107.89 (2C), 101.37, 71.32, 71.24, 67.76, 56.44 (2C), 43.69,  
 682 41.29, 38.37, 29.67.

683 ESI-MS: calc'd for  $\text{C}_{23}\text{H}_{21}\text{N}_3\text{O}_7\text{S}$   $[\text{M}+\text{H}]^+$  : 484.11, found 484.00  $[\text{M}+\text{H}]^+$ .

684

685

686

687

### 17.1. <sup>1</sup>H NMR spectrum of compound 3'N

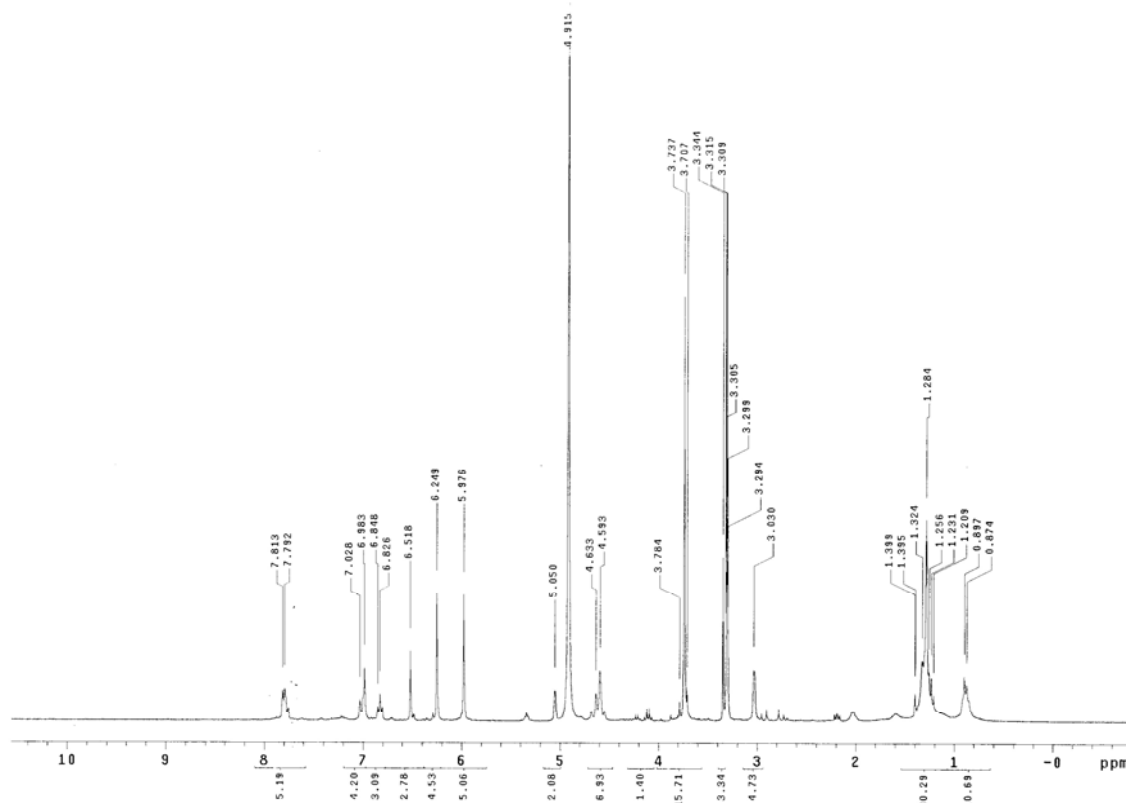

688

689

690

### 17.2. <sup>13</sup>C NMR spectrum of compound 3'N

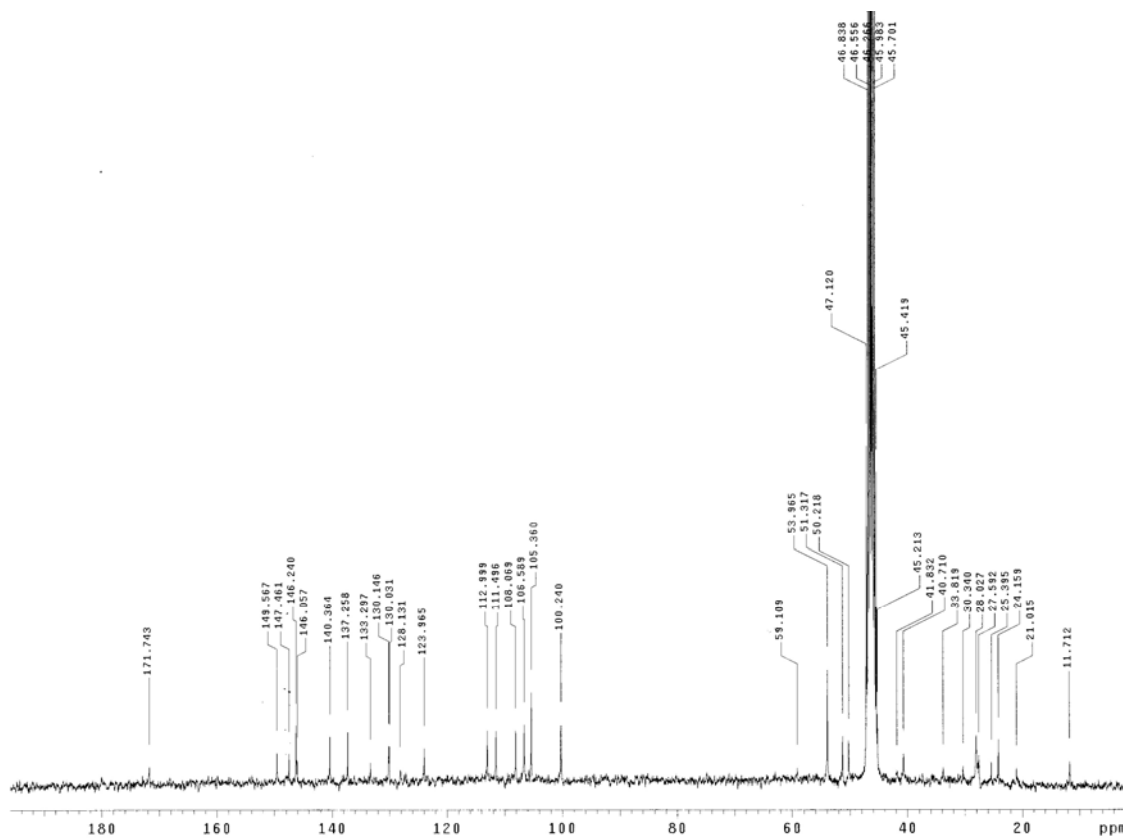

691

692

693

694

### 17.3. $^1\text{H}$ - $^1\text{H}$ COSY diagram of compound 3'N

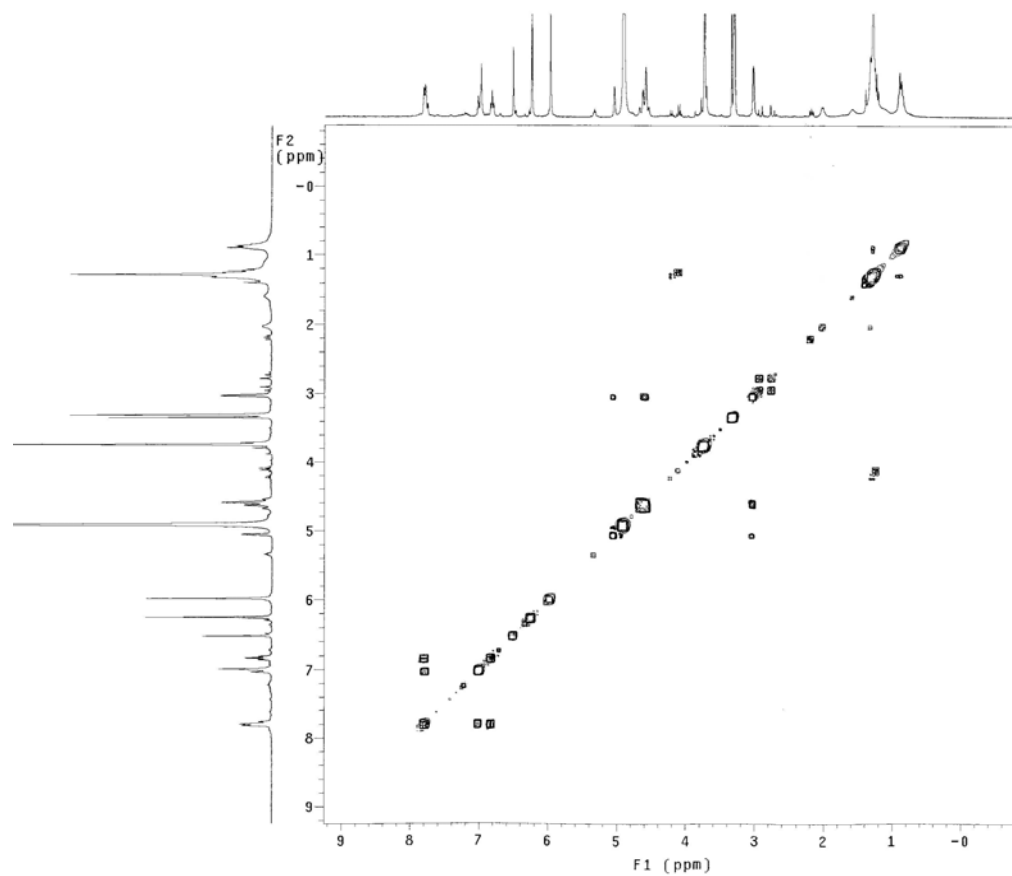

695

696

697

### 17.4. HMBC diagram of compound 3'N

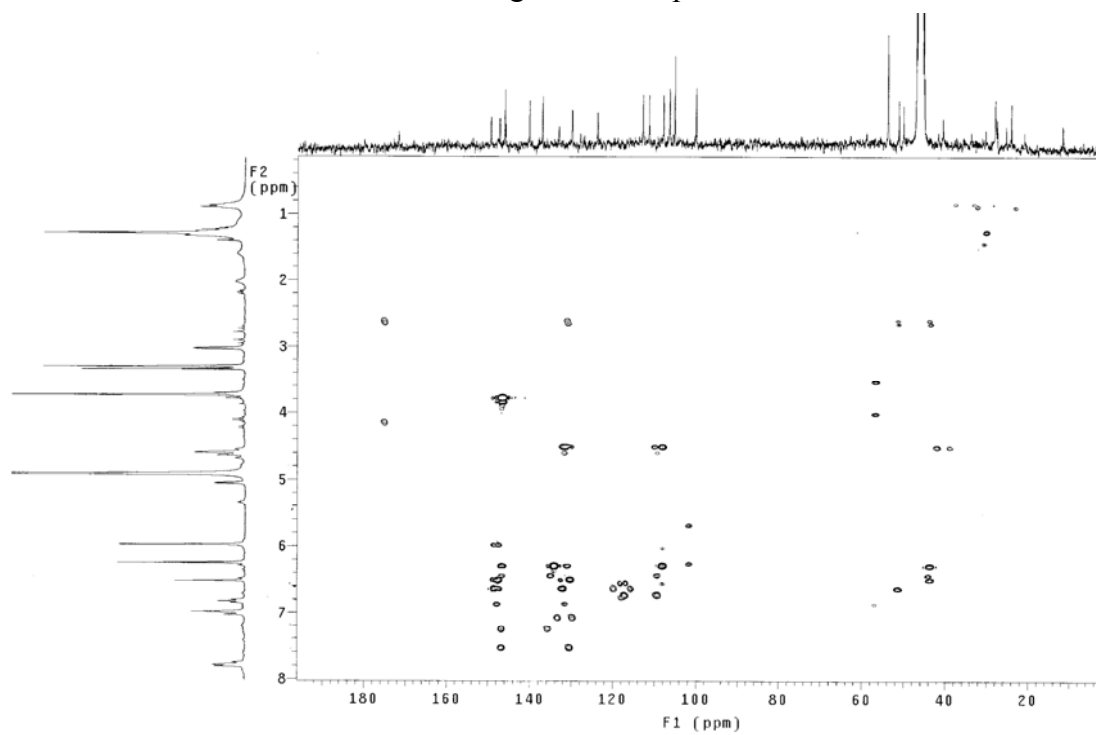

698

699

700

## 17.5. HSQC diagram of compound 3'N

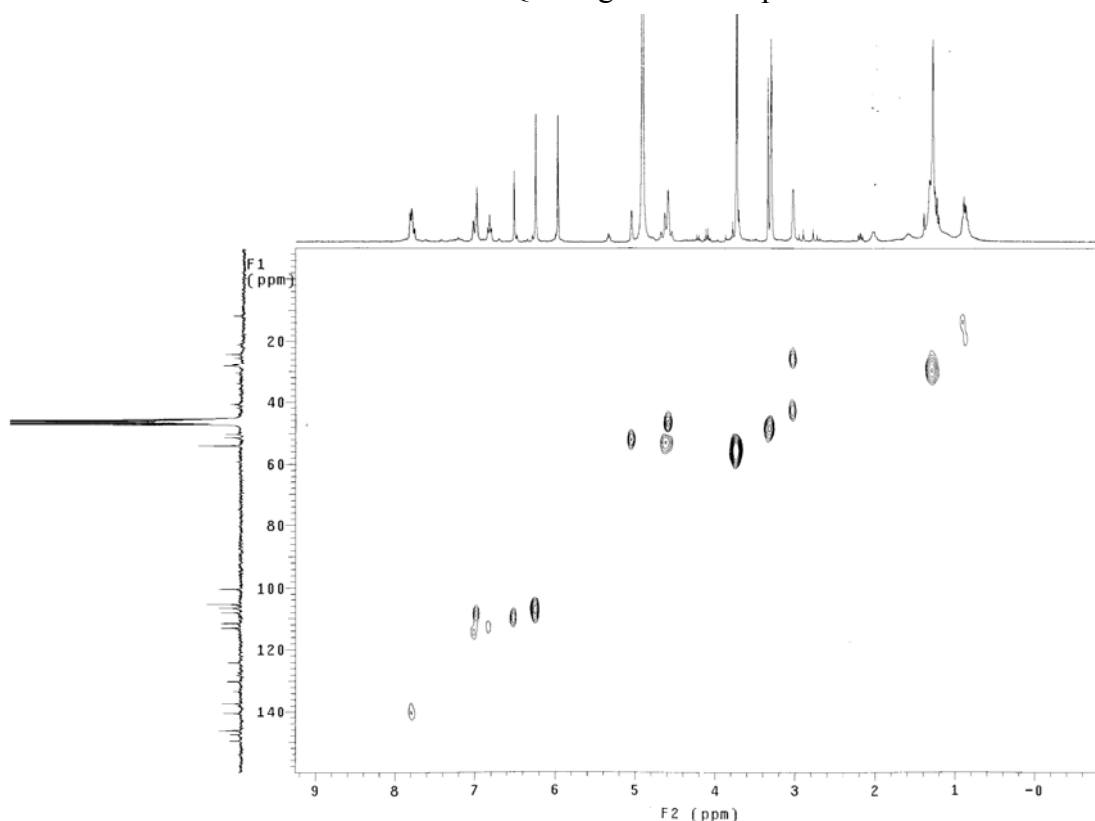

701

702

703

## 17.6. MS spectrum of compound 3'N

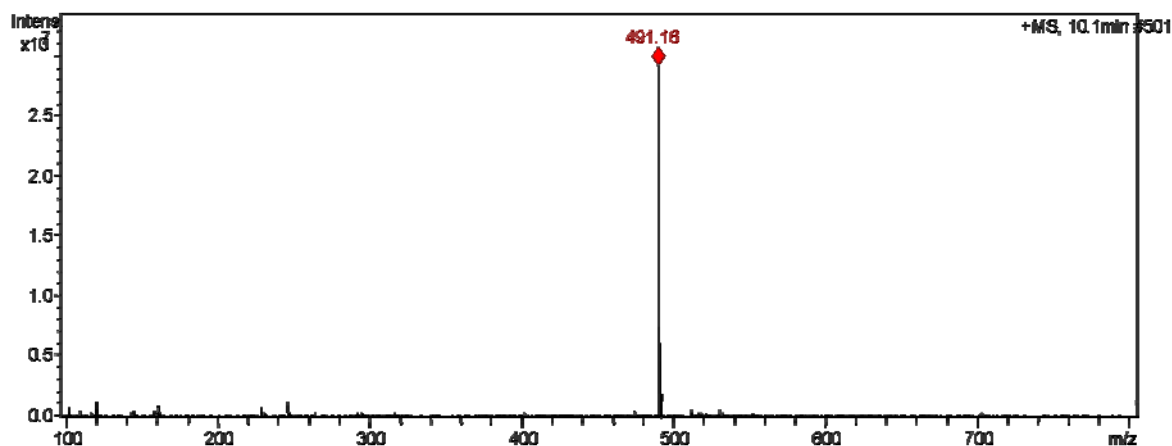

704

705 4 $\beta$ -N-(pyridine-2)-4-deoxy-4'-demethyl-podophyllotoxin (3'N)

706  $^1\text{H}$  NMR (300 MHz,  $\text{CD}_3\text{OD}$ ):  $\delta$  7.813 (d,  $J = 6.3$  Hz, 2H), 6.983 (s, 2H), 6.826 (t,  $J = 6.6$  Hz, 1H), 6.369 (s,  
 707 1H), 6.249 (s, 2H), 5.976 (s, 2H), 4.593 (d,  $J = 3.0$  Hz, 3H), 3.784 (t,  $J = 9.0$  Hz, 1H), 3.737 (s, 6H), 3.030 (s,  
 708 2H);  $^{13}\text{C}$  NMR (75 MHz,  $\text{CD}_3\text{OD}$ ):  $\delta$  171.743, 149.567, 147.461, 146.240 (2C), 140.364, 137.258, 133.297,  
 709 130.146, 130.031, 128.131, 123.965, 112.999, 111.496, 108.069, 106.589, 105.360 (2C), 100.240, 59.109, 53.965  
 710 (2C), 51.317, 50.218, 41.832, 40.710.

711 ESI-MS: calc'd for  $\text{C}_{26}\text{H}_{24}\text{N}_2\text{O}_7$   $[\text{M}+\text{H}]^+$ : 491.18, found 491.16  $[\text{M}+\text{H}]^+$ .

712

713

714

715

716

717  
718

### 18.1. $^1\text{H}$ NMR spectrum of compound 4'N

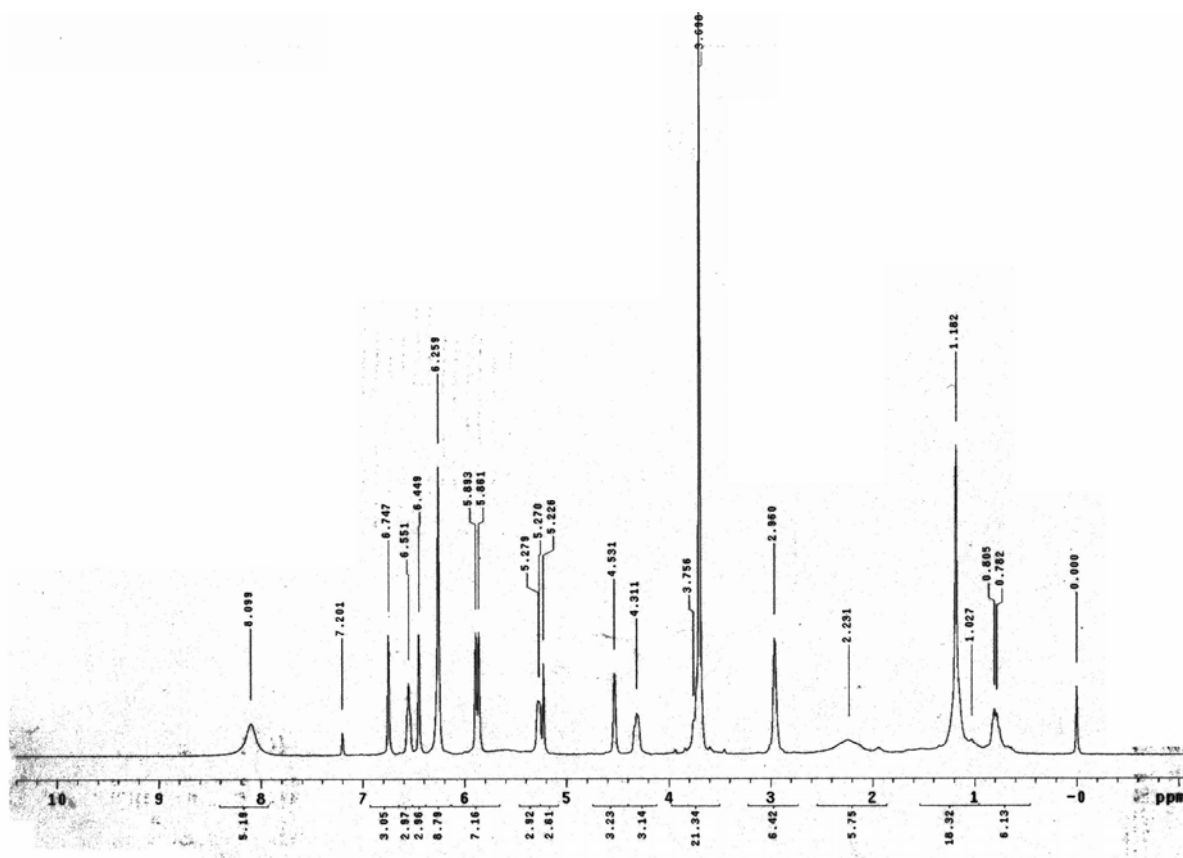

719  
720  
721

### 18.2. $^{13}\text{C}$ NMR spectrum of compound 4'N

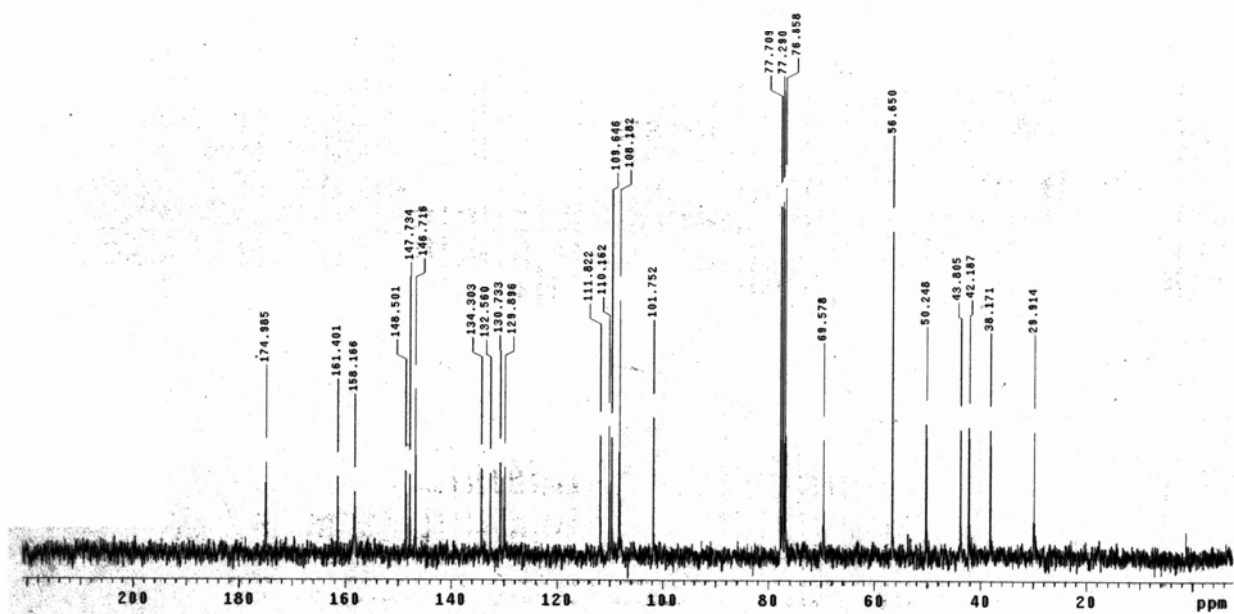

722  
723  
724  
725

726

18.3.  $^1\text{H}$ - $^1\text{H}$  COSY diagram of compound 4'N

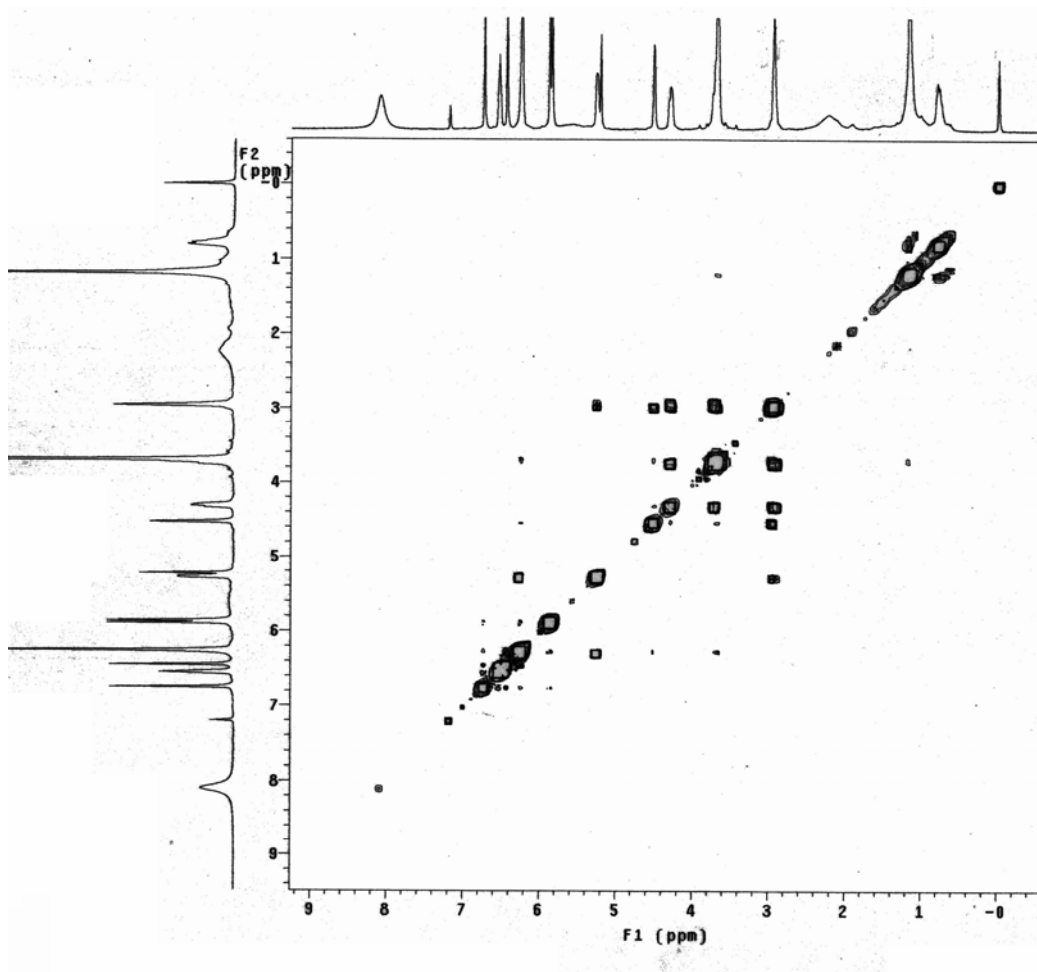

727

728

18.4. HMBC diagram of compound 4'N

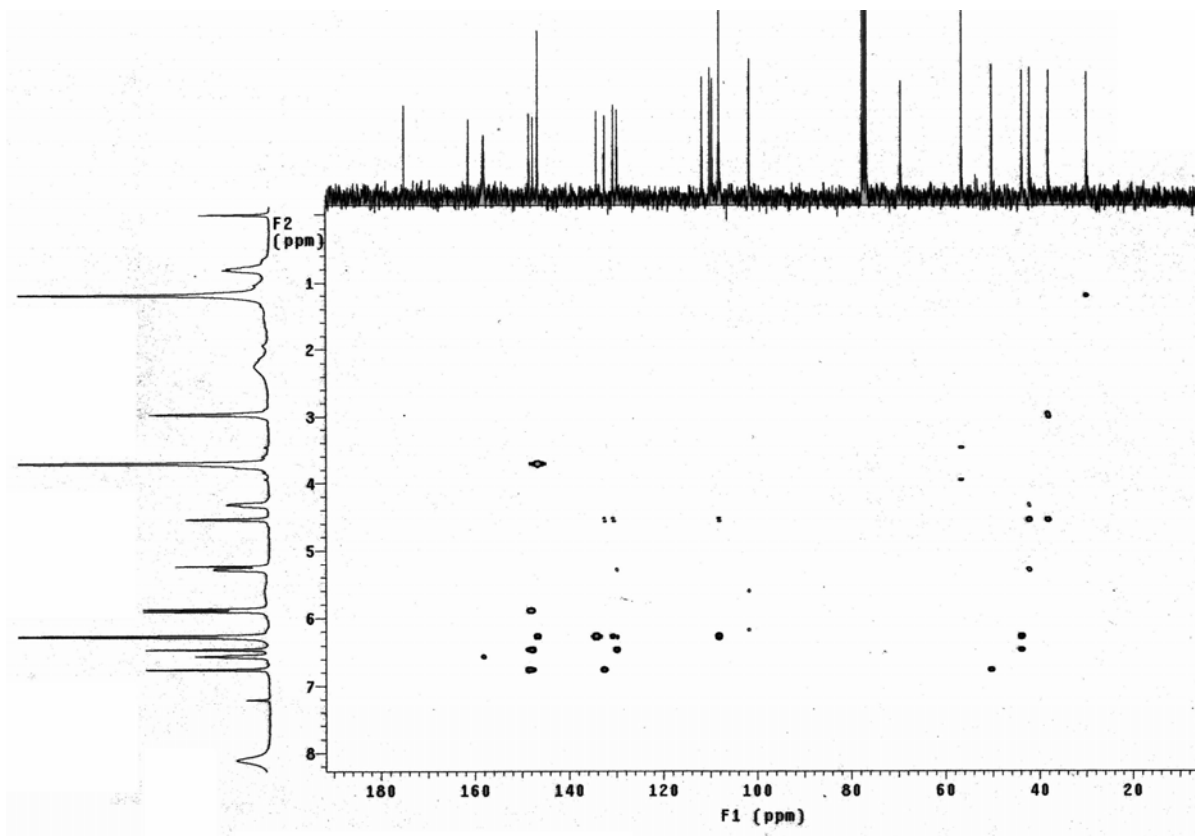

729

730

## 18.5. HSQC spectrums for compound 4'N.

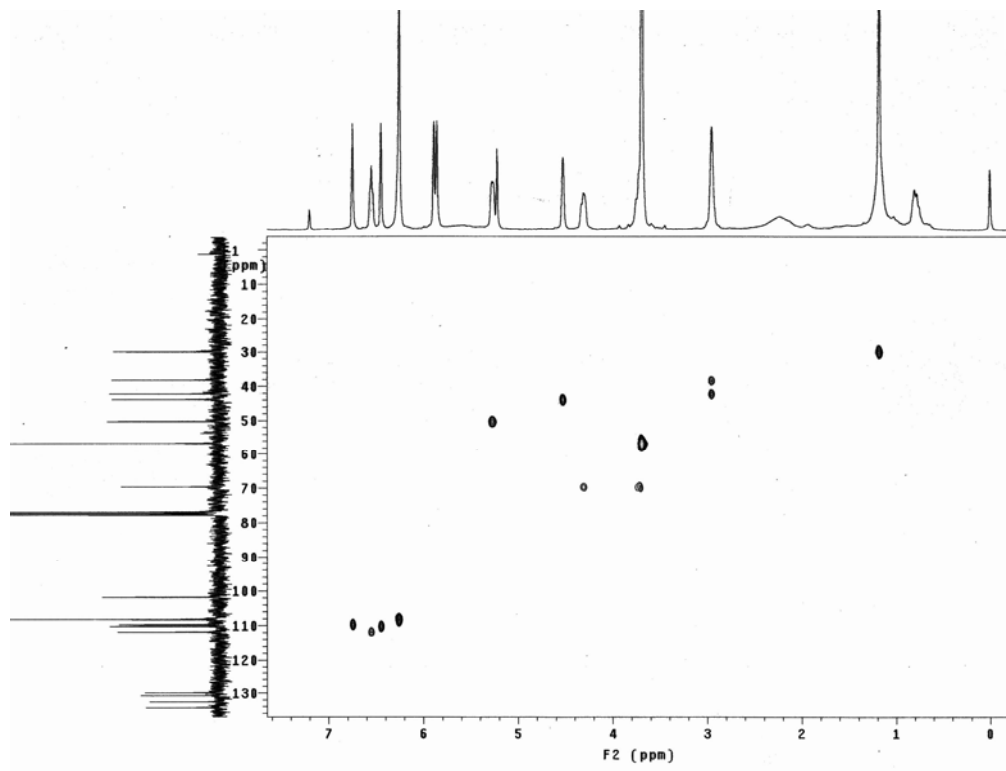

731

732

733

## 18.6. MS spectrum of compound 4'N

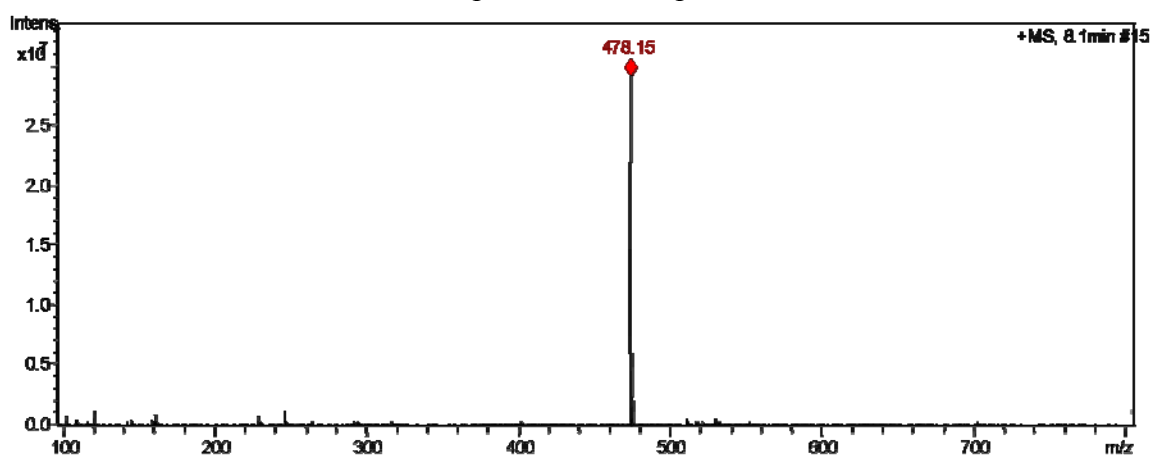

734

735 4 $\beta$ -N-(pyrimidine-2)-4-deoxy-4'-demethyl-podophyllotoxin (4'N)736  $^1\text{H}$  NMR (300 MHz,  $\text{CDCl}_3$ ):  $\delta$  8.099 (s, 2H), 6.747 (s, 1H), 6.551 (s, 1H), 6.449 (s, 1H), 6.259 (s, 2H), 5.893 (d,737  $J = 9.6$  Hz, 2H), 5.279 (d,  $J = 2.7$  Hz, 1H), 5.226 (s, 1H), 4.289 (t,  $J = 7.8$  Hz, 1H), 4.531 (s, 1H), 4.311 (s, 1H),738 3.756 (t,  $J = 5.4$  Hz, 1H), 3.698 (s, 6H), 2.960 (s, 2H);  $^{13}\text{C}$  NMR (75 MHz,  $\text{CDCl}_3$ ):  $\delta$  174.985, 161.401,

739 158.166, 148.501, 147.734, 146.716 (2C), 134.303, 132.560, 130.733, 129.896, 111.822, 110.162, 109.646,

740 108.182 (2C), 101.752, 69.578, 56.650 (2C), 50.248, 43.805, 42.187, 38.171, 29.914.

741 ESI-MS: calc'd for  $\text{C}_{25}\text{H}_{23}\text{N}_3\text{O}_7$   $[\text{M}+\text{H}]^+$ : 478.16, found 478.15  $[\text{M}+\text{H}]^+$ .

742

743

744

745

746

747

19.1.  $^1\text{H}$  NMR spectrum of compound 5'N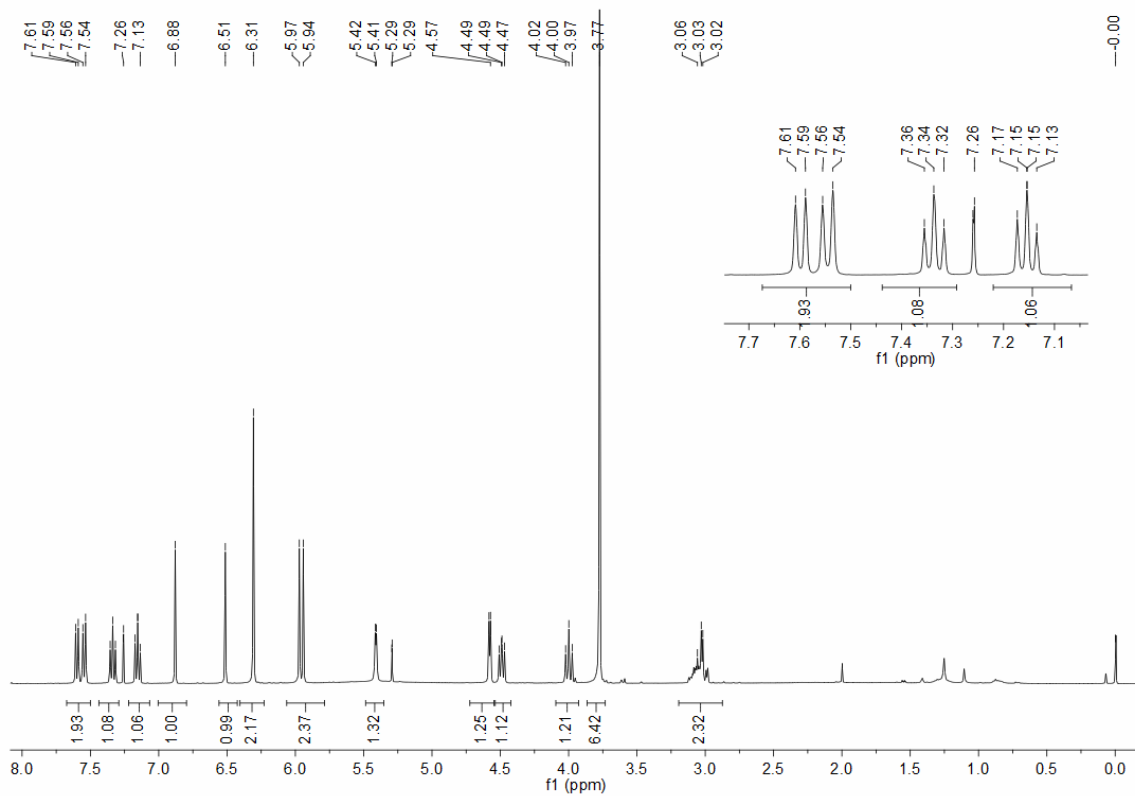

748

749

750

751

19.2.  $^{13}\text{C}$  NMR spectrum of compound 5'N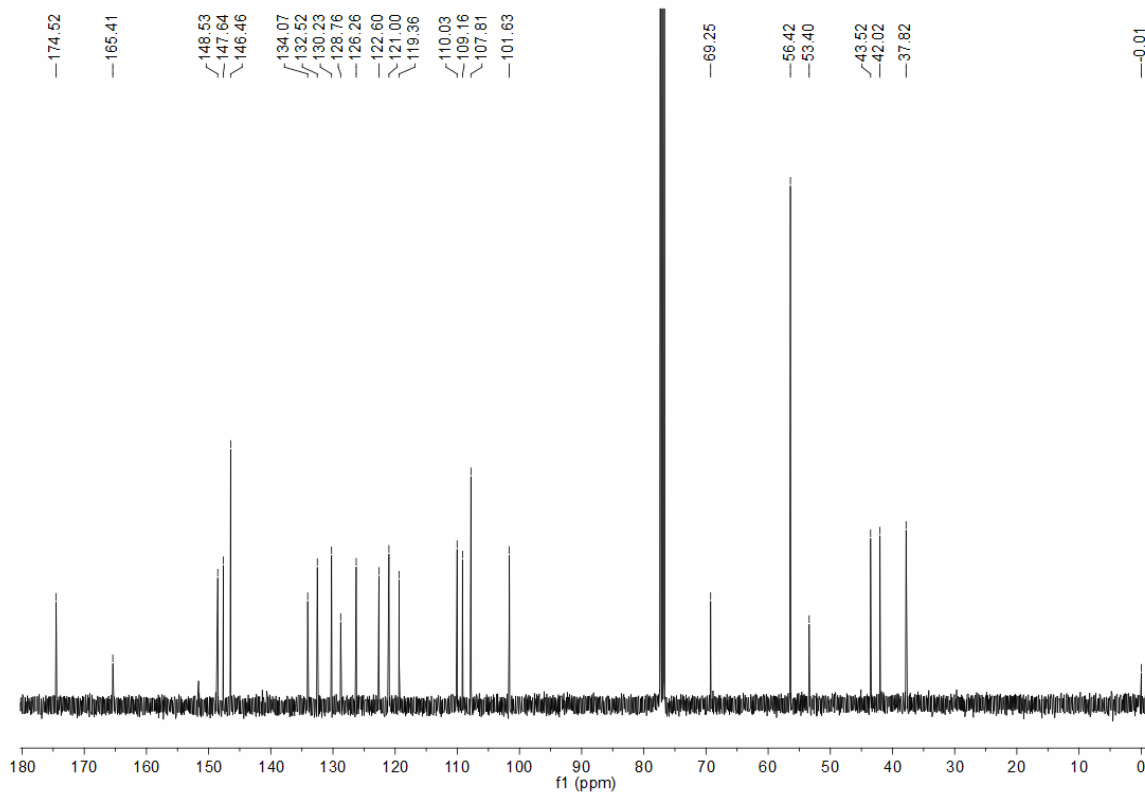

752

753

754



755

### 19.3. $^1\text{H}$ - $^1\text{H}$ COSY diagram of compound 5'N

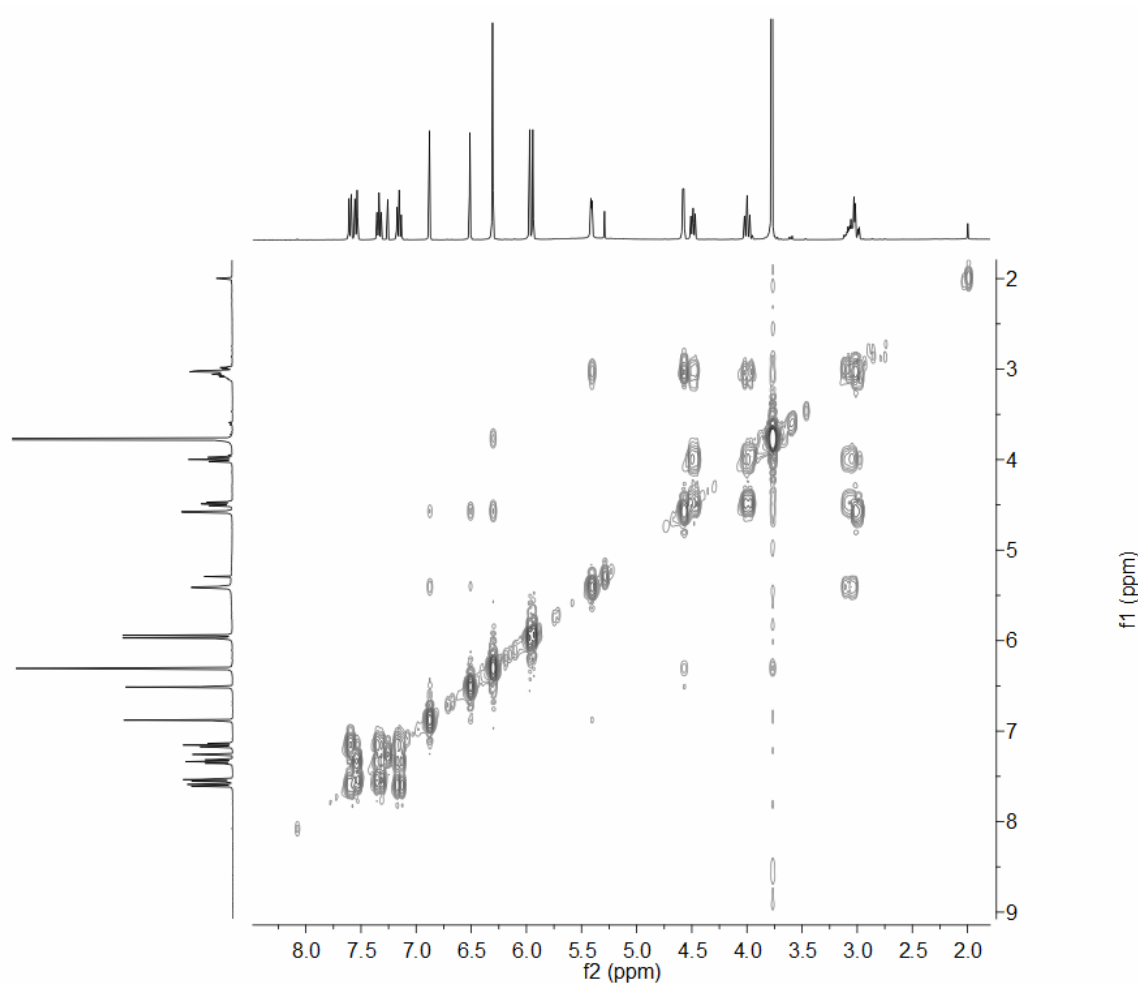

756

757

### 19.4. HMBC diagram of compound 5'N

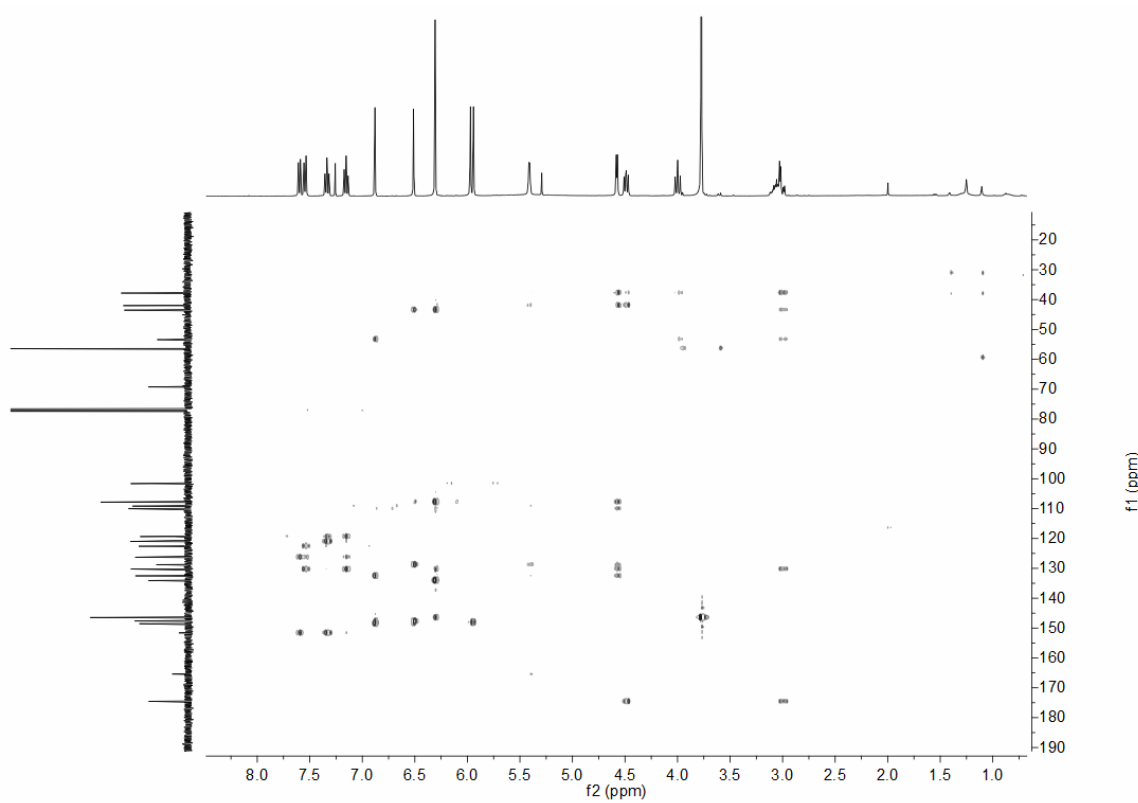

758

759

## 19.5. HSQC diagram of compound 5'N

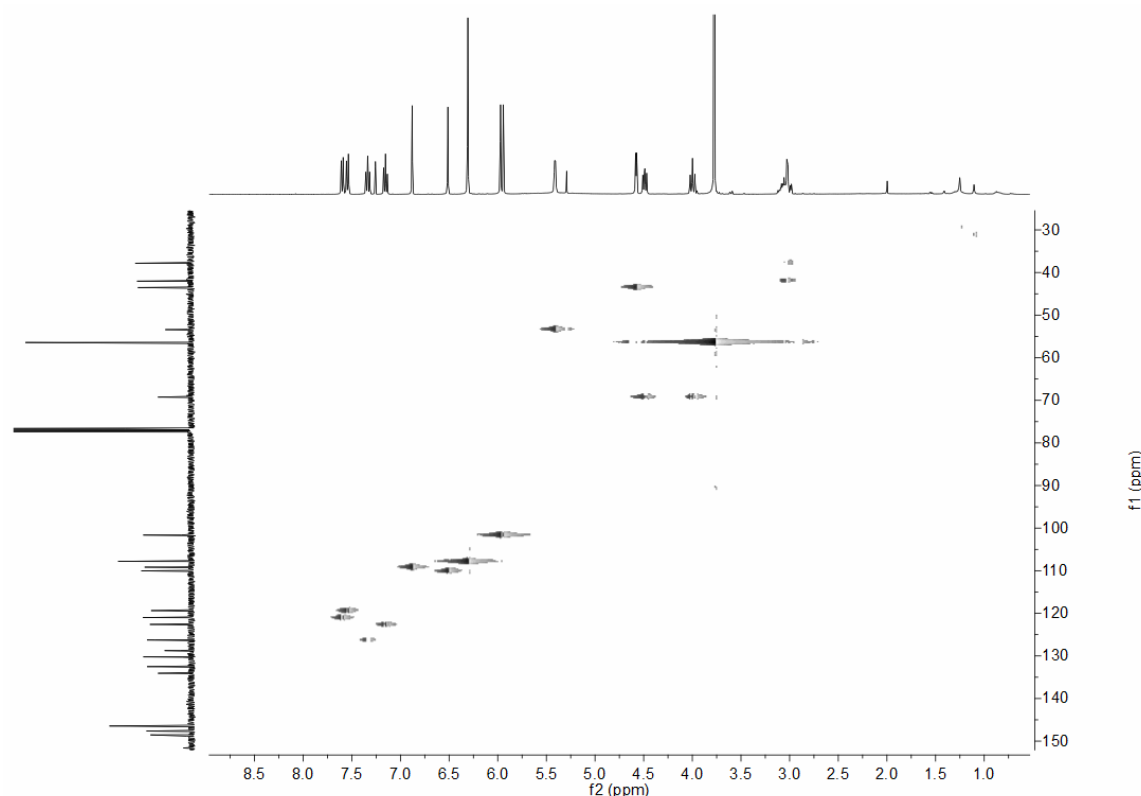

760

761

762

## 19.6. MS spectrum of compound 5'N

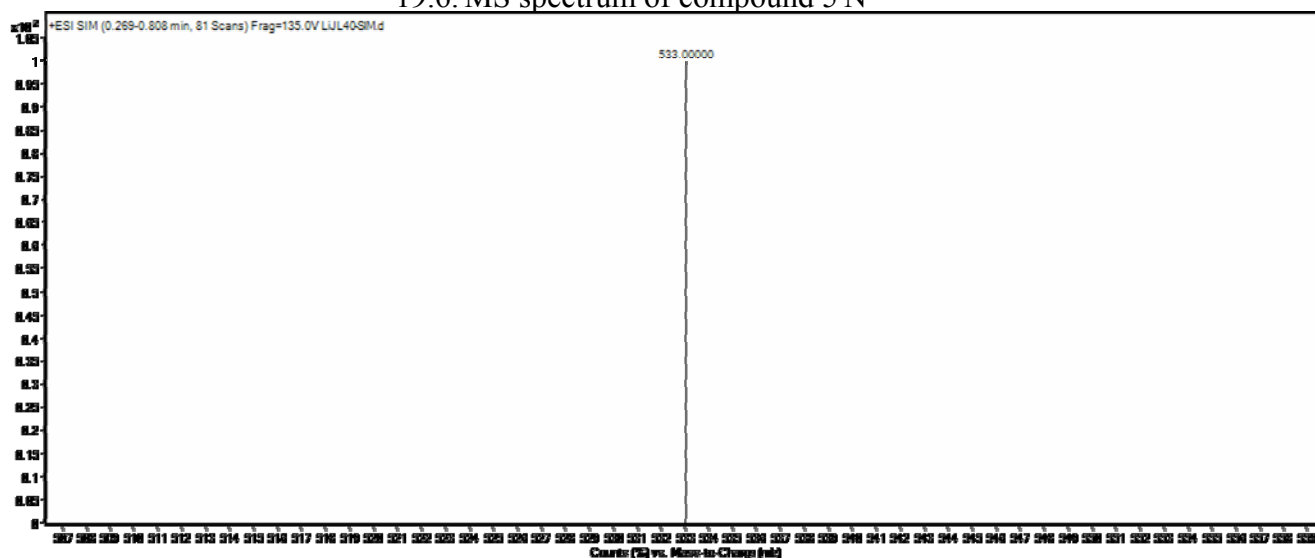

763

764

765 4 $\beta$ -N-(benzothiazole-2)-4-deoxy-4'-demethyl-podophyllotoxin (5'N)

766  $^1\text{H}$  NMR (400 MHz,  $\text{CDCl}_3$ ):  $\delta$  7.61 (d,  $J$  = 8.0 Hz, 1H), 7.56 (d,  $J$  = 8.0 Hz, 1H), 7.34 (t,  $J$  = 8.0 Hz, 1H), 7.15  
 767 (t,  $J$  = 8.0 Hz, 1H), 6.88 (s, 1H), 6.51 (s, 1H), 6.31 (s, 2H), 5.97 (d,  $J$  = 12.0 Hz, 2H), 5.42 (d,  $J$  = 4.0 Hz, 1H),  
 768 4.58 (d,  $J$  = 4.0 Hz, 1H), 4.49 (t,  $J$  = 8.0 Hz, 1H), 4.00 (t,  $J$  = 8.0 Hz, 1H), 3.77 (s, 6H), 3.12-2.98 (m, 2H);  $^{13}\text{C}$   
 769 NMR (101 MHz,  $\text{CDCl}_3$ ):  $\delta$  174.52 (2C), 165.41, 151.61, 148.53, 147.64, 146.46 (2C), 134.07, 132.52, 130.23,  
 770 128.76, 126.26, 122.60 (2C), 121.00, 119.36, 110.03, 109.16, 107.81 (2C), 101.63, 69.25, 56.42 (2C), 53.40,  
 771 43.52, 42.02, 37.82.

772 ESI-MS: calc'd for  $\text{C}_{28}\text{H}_{24}\text{N}_2\text{O}_7\text{S}$   $[\text{M}+\text{H}]^+$ : 533.13, found 533.00  $[\text{M}+\text{H}]^+$ .

773

20.1.  $^1\text{H}$  NMR spectrum of compound 6'N.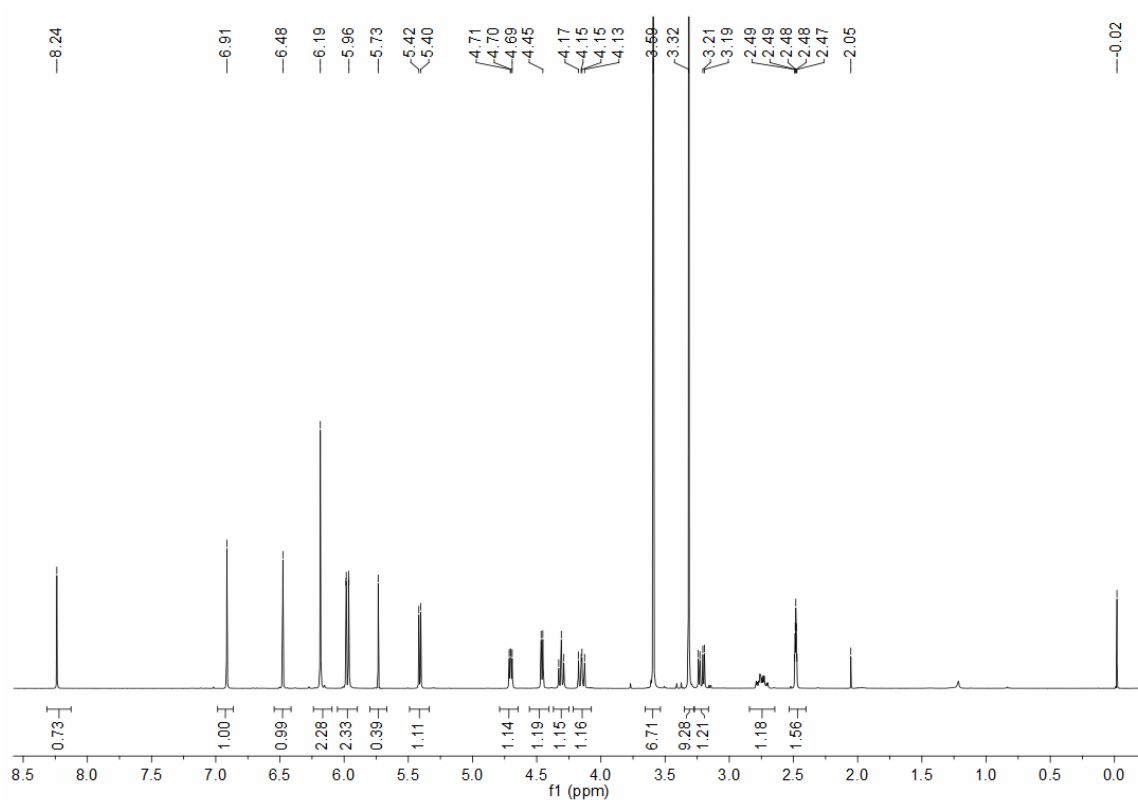

774

775

776

20.2.  $^{13}\text{C}$  NMR spectrum of compound 6'N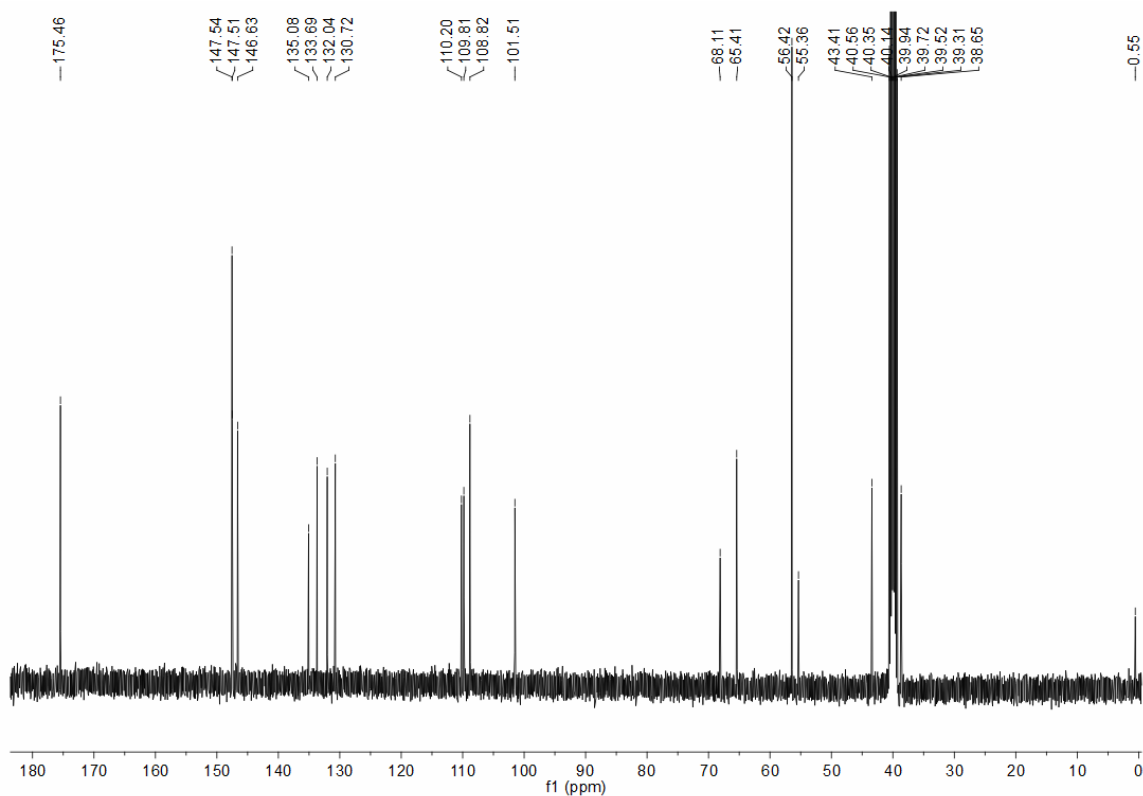

777

778

779

780

781

20.3.  $^1\text{H}$ - $^1\text{H}$  COSY diagram of compound 6'N

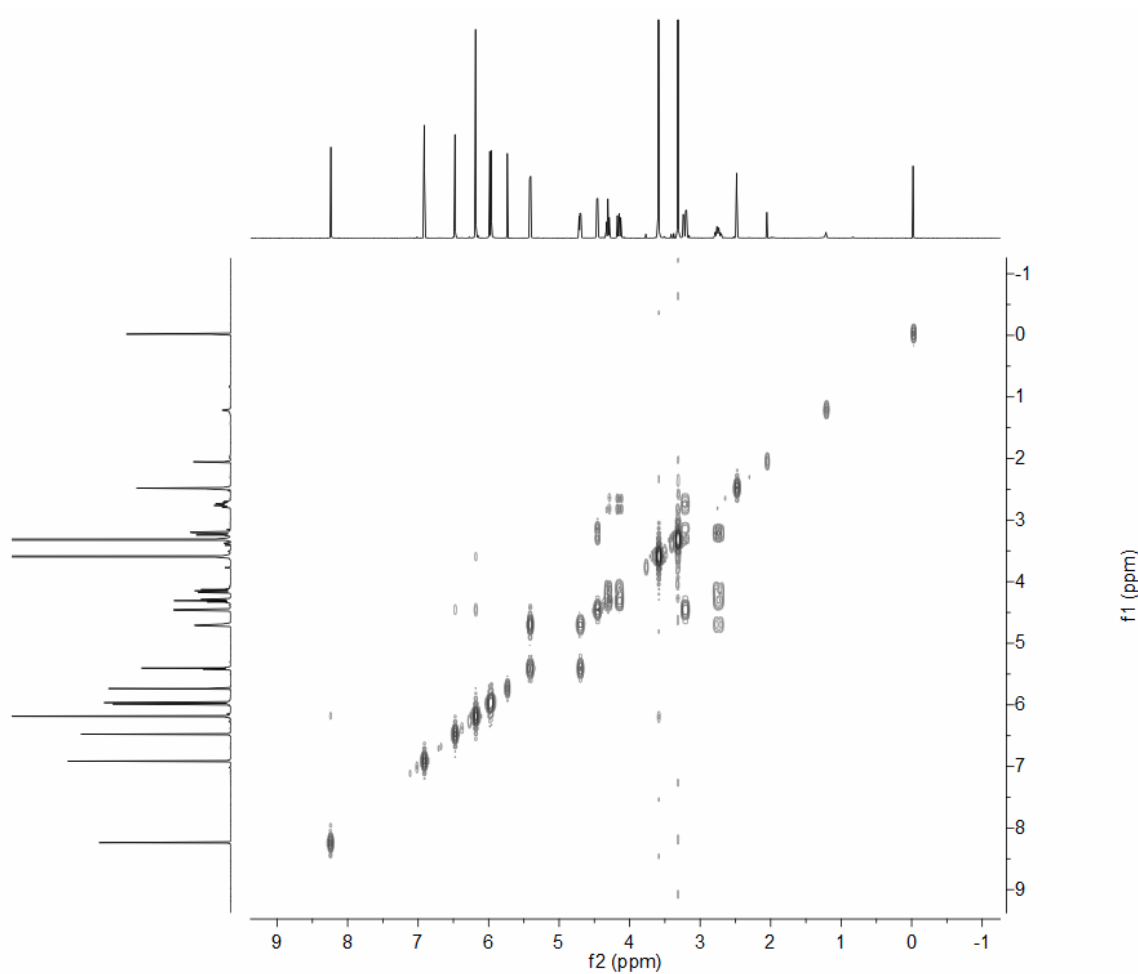

782

783

20.4. HMBC diagram of compound 6'N

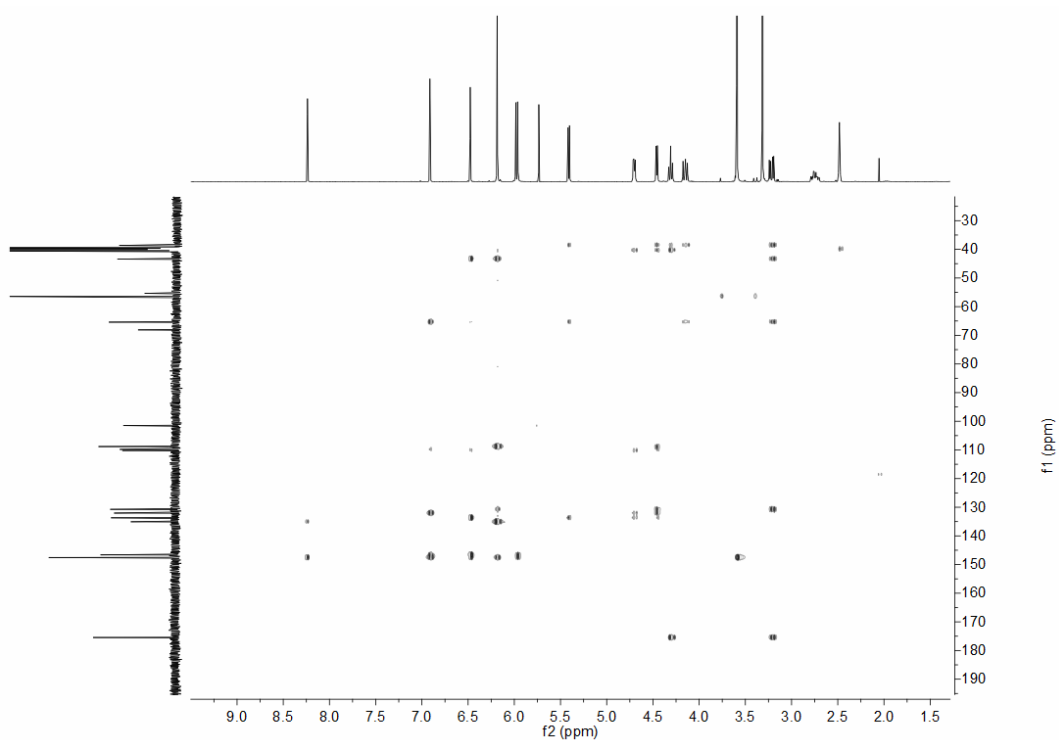

784

785

786

## 20.5. HSQC diagram of compound 6'N

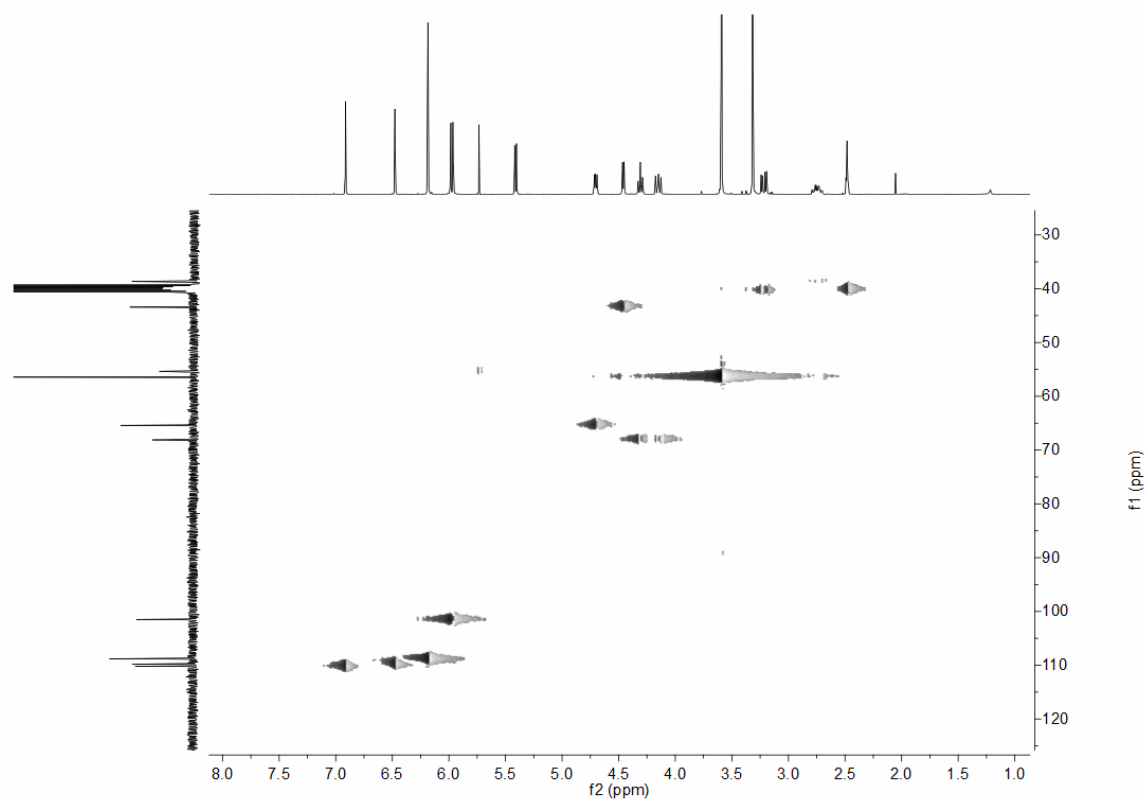

787

788

789

790

## 20.6. MS spectrum of compound 6'N

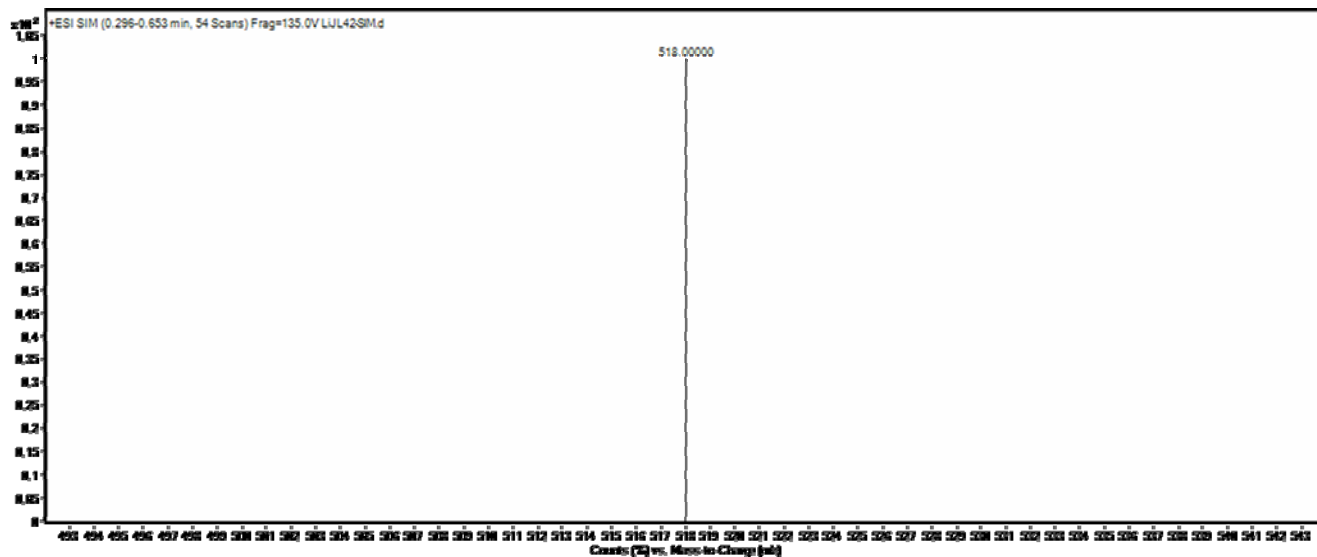

791

792

793  $^1\text{H}$  NMR (400 MHz, DMSO):  $\delta$  8.24 (s, 1H), 6.91 (s, 1H), 6.48 (s, 1H), 6.19 (s, 2H), 5.98 (d,  $J = 8.0$   
 794 Hz, 2H), 5.42 (d,  $J = 8.0$  Hz, 1H), 4.71 (dd,  $J = 4.0$  Hz, 1H), 4.47 (d,  $J = 8.0$  Hz, 1H), 4.31 (t,  $J =$   
 795 8.0 Hz, 1H), 4.15 (t,  $J = 8.0$  Hz, 1H), 3.59 (s, 6H), 3.24-3.19 (m, 1H), 2.79 - 2.70 (m, 1H);  $^{13}\text{C}$   
 796 NMR (101 MHz, DMSO):  $\delta$  175.46 (2C), 147.54, 147.51 (2C), 146.63 (2C), 135.08, 133.69 (2C),  
 797 132.04, 130.72 (2C), 110.20, 109.81, 108.82 (2C), 101.51, 68.11, 65.41, 56.42 (2C), 55.36, 43.41,  
 798 38.65.

799 ESI-MS: calc'd for  $\text{C}_{26}\text{H}_{23}\text{N}_5\text{O}_7$   $[\text{M}+\text{H}]^+$ : 518.16, found 518.00  $[\text{M}+\text{H}]^+$
